# Supplementary material for: A Supramolecular Approach to Structure-Based Design with A Focus on Synthons Hierarchy in Ornithine-Derived Ligands: Review, Synthesis, Experimental and in Silico Studies
Source: PubMed Central journal article supplement (PMC7179192; doi:10.3390/molecules25051135), 2020-03-03
Supplement: molecules-25-01135-s001.pdf [file molecules-25-01135-s001.pdf]

# SUPPLEMENTARY MATERIALS

## A Supramolecular Approach to Structure-based Design with a Focus on Synthons Hierarchy in Ornithine-derived Ligands: Review, Synthesis, Experimental and *in silico* Studies

Joanna Bojarska <sup>1\*</sup>, Milan Remko <sup>2</sup>, Martin Breza <sup>3</sup>, Izabela D. Madura <sup>4</sup>, Krzysztof Kaczmarek <sup>5</sup>, Janusz Zabrocki <sup>5</sup>, and Wojciech M. Wolf <sup>1</sup>

<sup>1</sup> Institute of General and Ecological Chemistry, Lodz University of Technology, Faculty of Chemistry, Żeromskiego 116, Lodz, 90-924, Poland; wojciech.wolf@p.lodz.pl (W.M.W.); joanna.bojarska@p.lodz.pl (J.B.)

<sup>2</sup> Remedika, Sustekova 1, 85104, Bratislava, Slovakia; milan.remko@gmail.com (M.R.)

<sup>3</sup> Department of Physical Chemistry, Slovak Technical University, Radlinskeho 9, SK-81237 Bratislava, Slovakia; martin.breza@stuba.sk (M.B.)

<sup>4</sup> Warsaw University of Technology, Faculty of Chemistry, Noakowskiego 3, 00-664, Warszawa, Poland; izabela@ch.pw.edu.pl (I.D.M.)

<sup>5</sup> Institute of Organic Chemistry, Lodz University of Technology, Faculty of Chemistry, Żeromskiego 116, Lodz, 90-924, Poland; janusz.zabrocki@p.lodz.pl (J.Z.); krzysztof.kaczmarek@p.lodz.pl (K.K.)

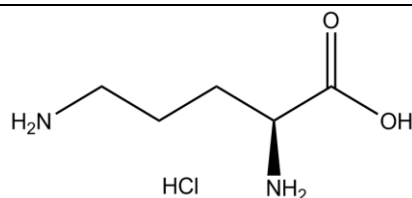

**Ornithine**

(2)

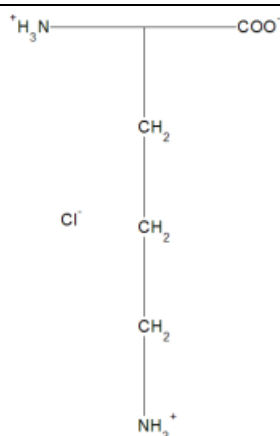

JADGED

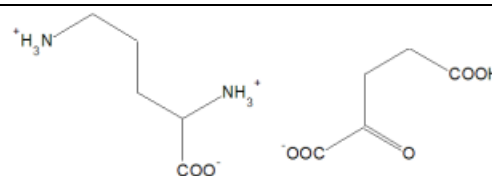

**BAPKIP**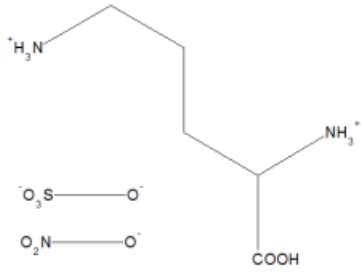**NAGLYC**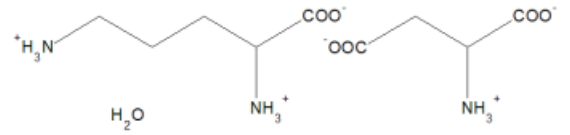**BAPKOV**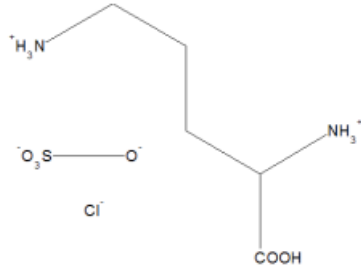**ORNBDL10**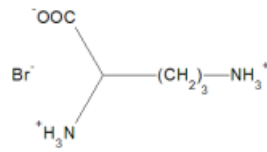**BAPKUB**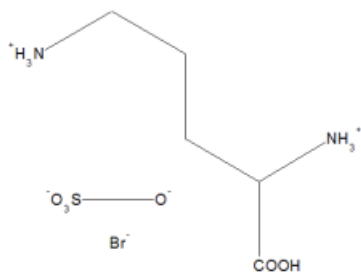**ORNSEB**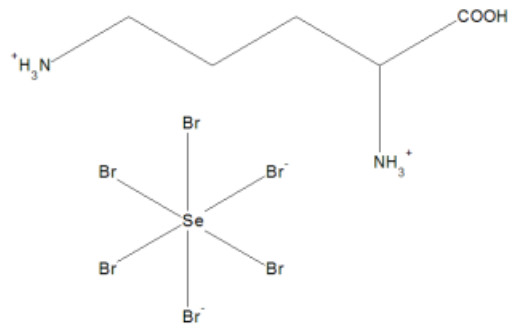**BEZQOO**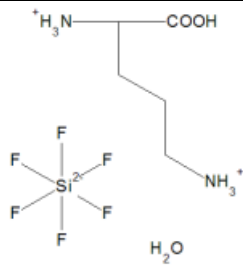**PUYVUA**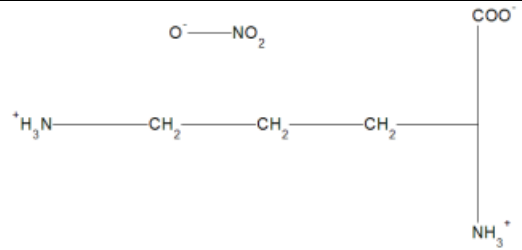**BIHYEX**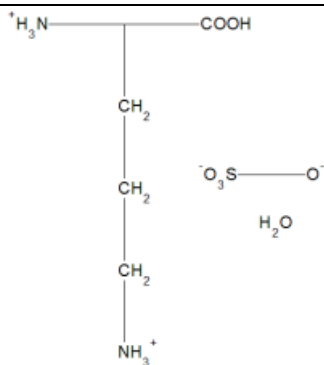**QQQAOJ**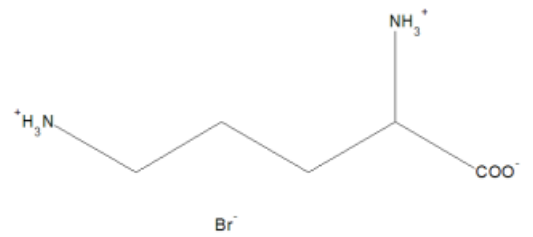**CAPRAM**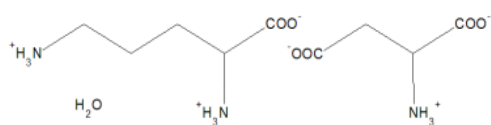**TEFMIA**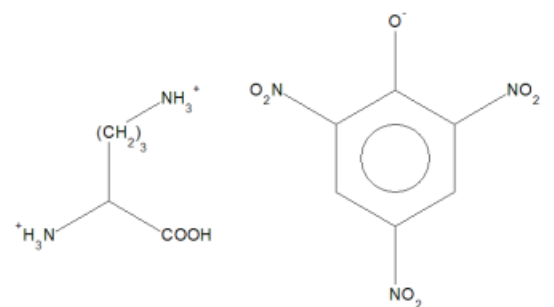

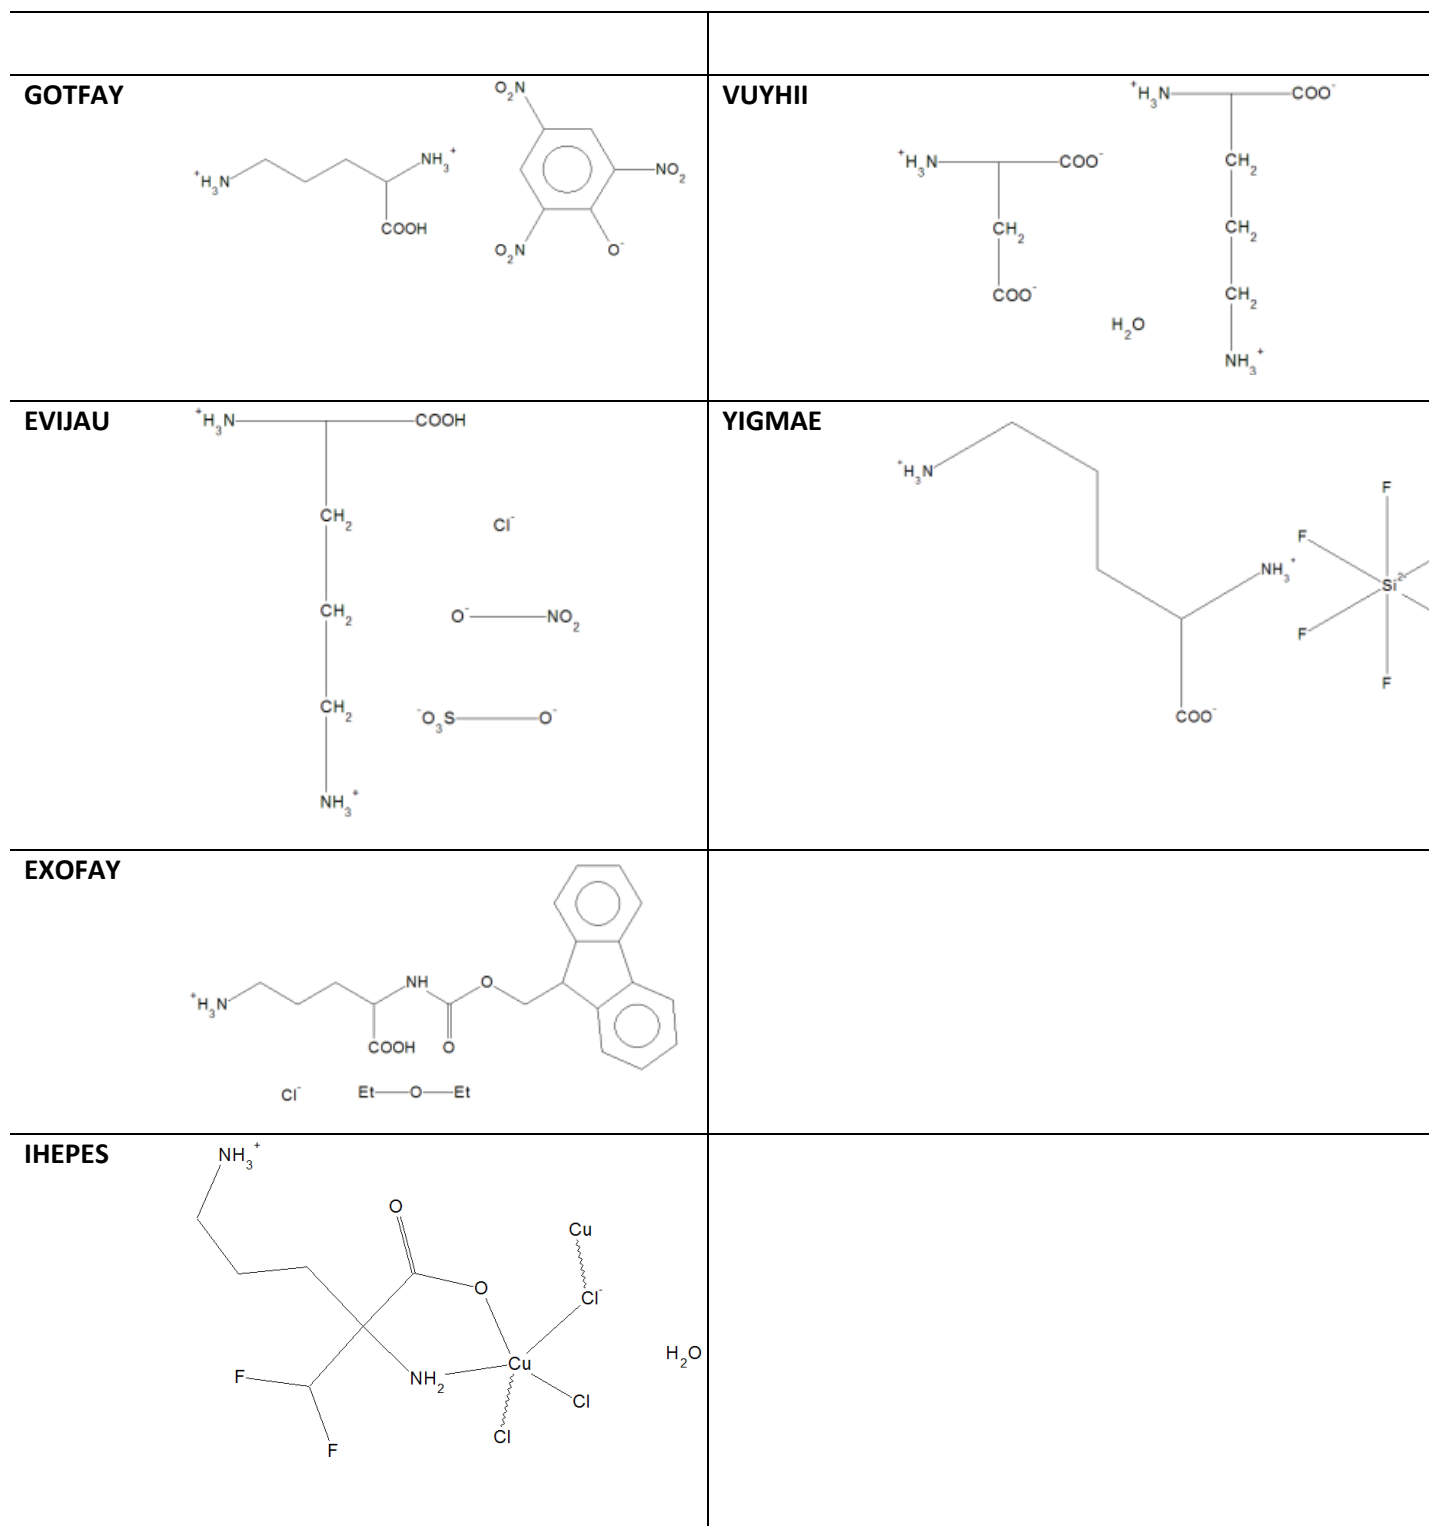

**Scheme S1.** Scheme of query used in CSD database search containing ornithine moiety.

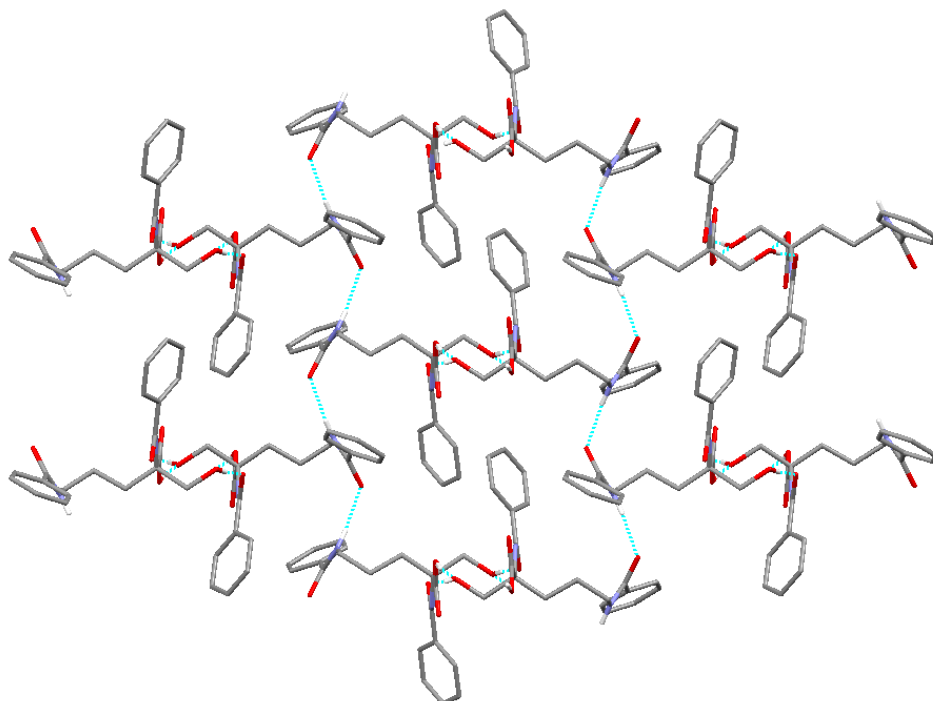

**Figure S1.** Molecules arrangement in the crystal of (1).

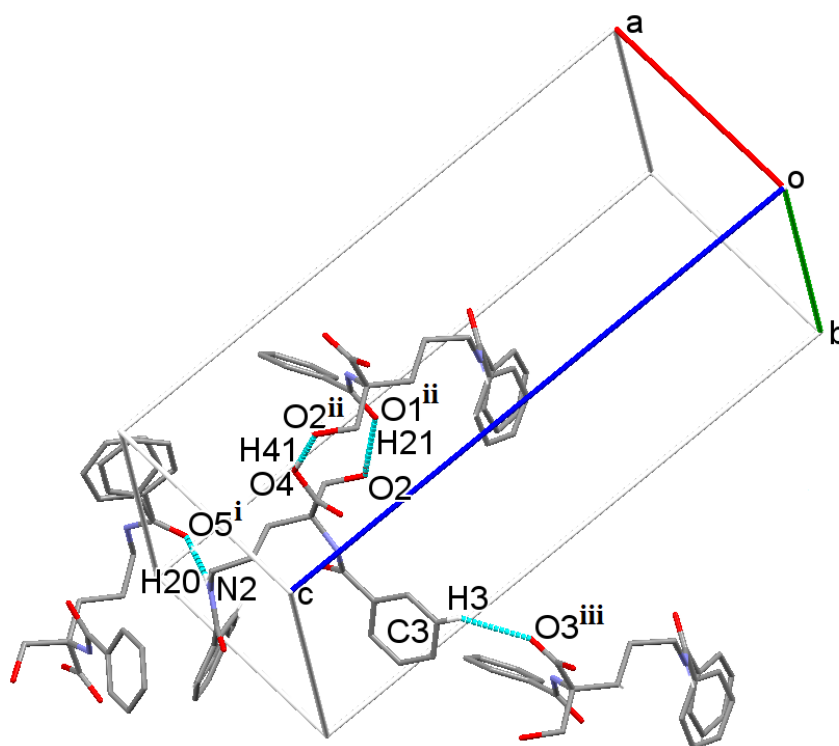

**Figure S2.** The intermolecular hydrogen bonds in the asymmetric unit of (1) [symmetry codes: (i)  $\frac{1}{2}+x, \frac{3}{2}-y, 2-z$ ; (ii)  $1-x, -1/2+y, 3/2-z$ ; (iii)  $-x, \frac{1}{2}+y, 3/2-z$ ].

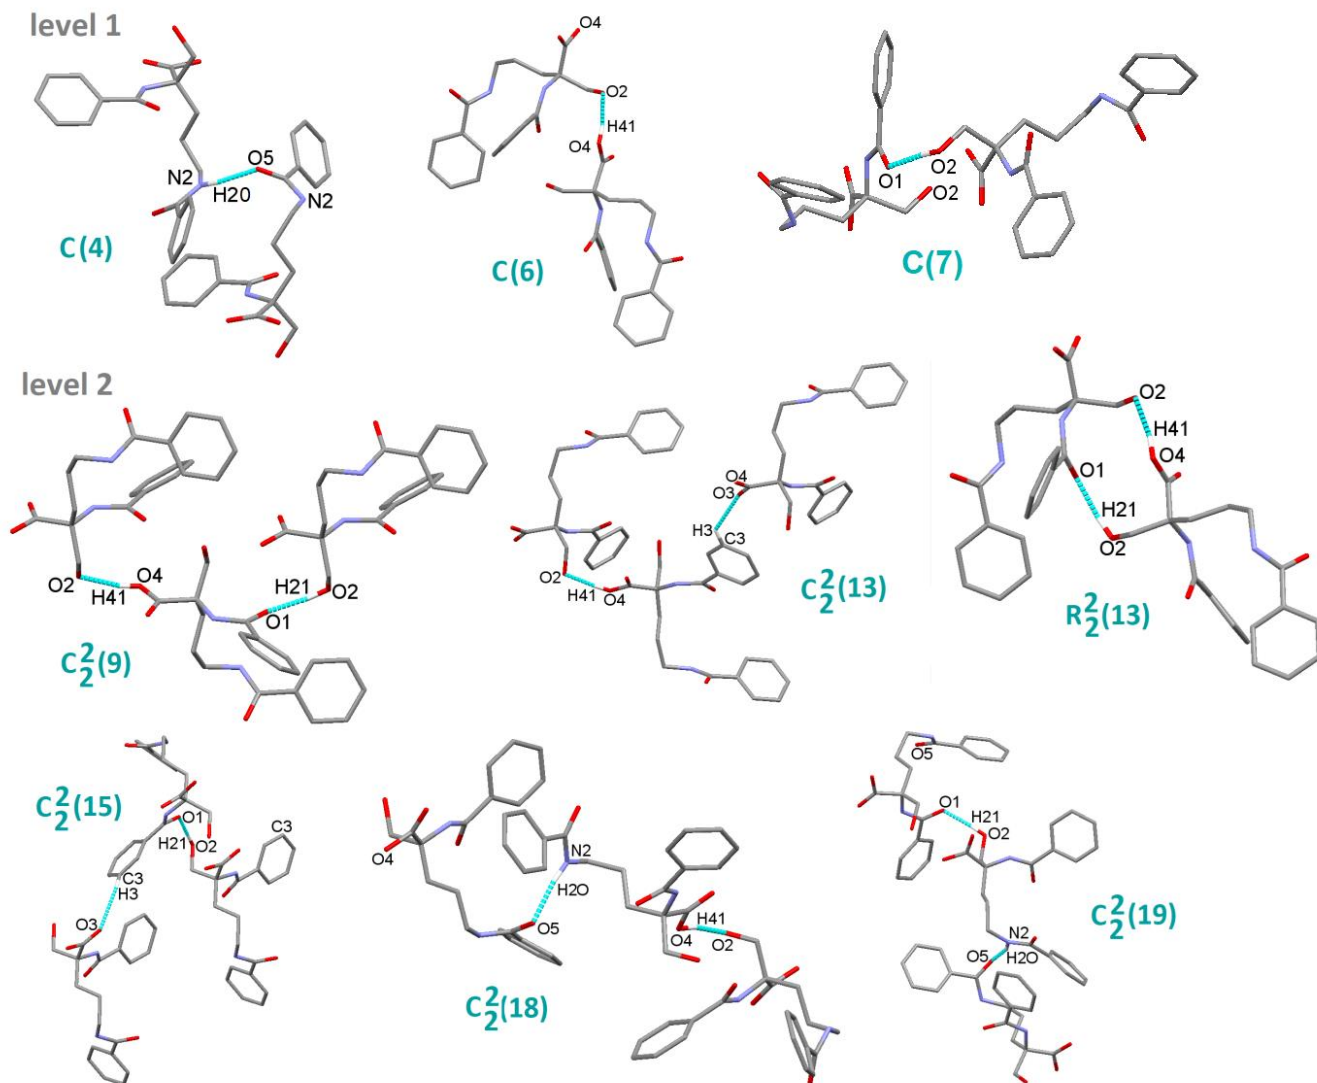

**Figure S3.** Supramolecular synthons in the assembly of (1). For clarity, hydrogen atoms not involved in the inter-contacts were omitted.

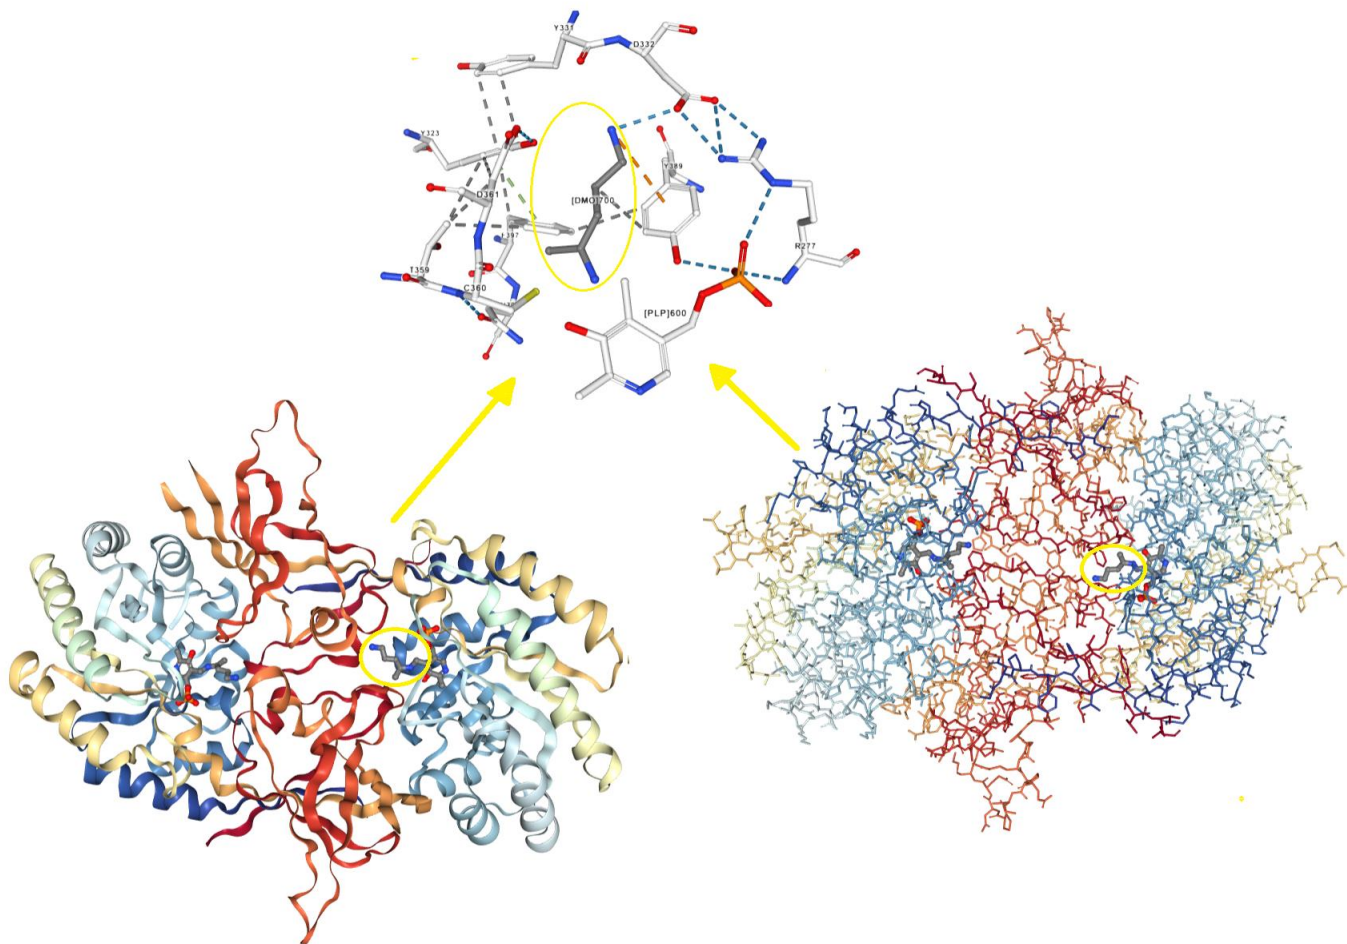

**Figure S4.** Ligand (difluoromethylornithine) interactions in the complex of ornithine decarboxylase with alpha-difluoromethylornithine (2TOD.pdb) (Grishin, 1999).

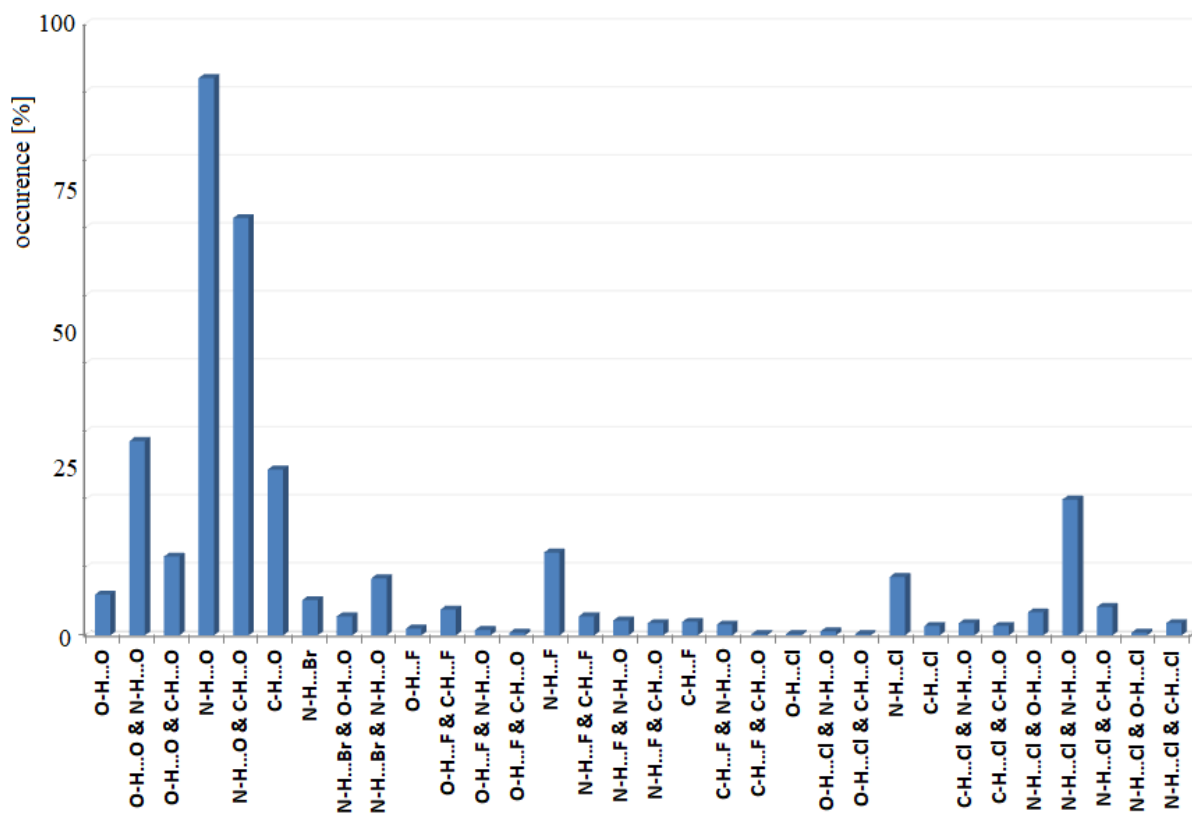

**Figure S5.** Frequency of occurrence concerning synthons.

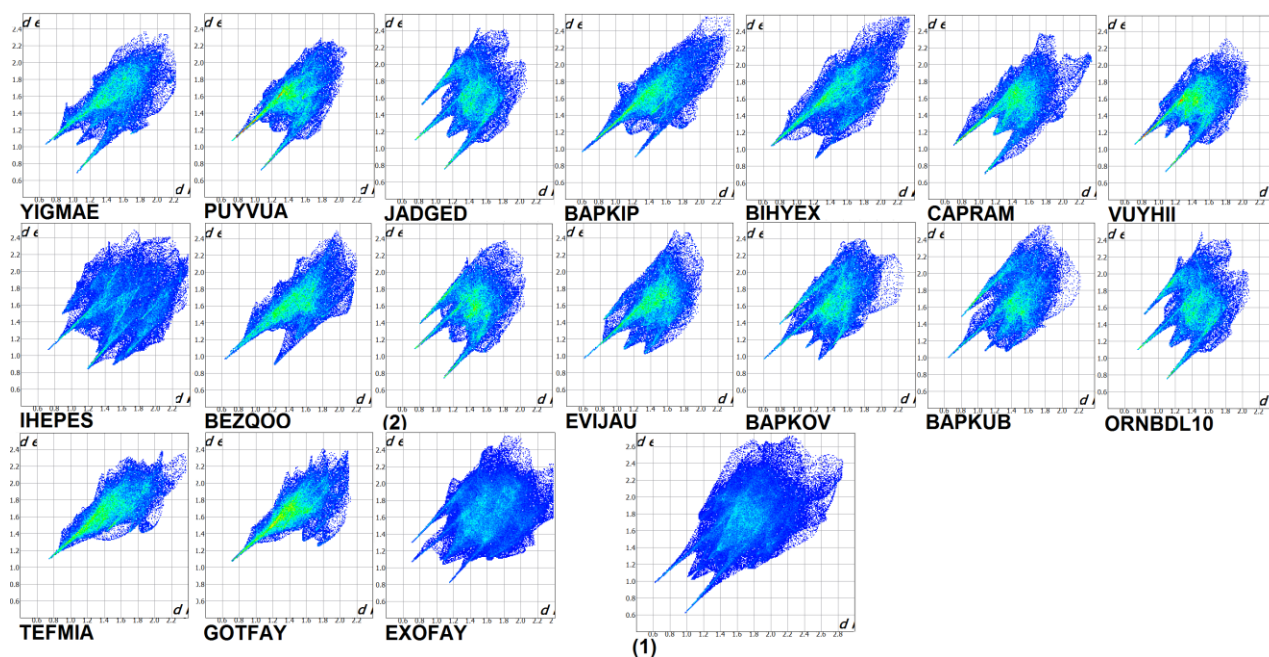

Figure S6. Full FP plots of all studied crystals.

Table S1. Basic information concerning ornithine derivatives retrieved from the CSD.

| <i>CSD ref. code</i> | <i>formula</i>                                                                                             | <i>Crystal system</i> | <i>Space group</i> | <i>Unit cel parameters[Å; °]</i>                                                                     | <i>Z</i> | <i>R1</i> | <i>T</i> |
|----------------------|------------------------------------------------------------------------------------------------------------|-----------------------|--------------------|------------------------------------------------------------------------------------------------------|----------|-----------|----------|
| <b>BAPKIP</b>        | <i>tris(1-carboxybutane-1,4-diaminium) dinitrate bis(sulfate) [tris(ornithine) dinitrate bis(sulfate)]</i> |                       |                    |                                                                                                      |          |           |          |
|                      | $C_{15}H_{42}N_8O_{20}S_2$                                                                                 | hexagonal             | $P6_3$             | $a = 10.0952(8)$<br>$b = 10.0952(8)$<br>$c = 17.7907(16)$<br>$\alpha = 90, \beta = 90, \gamma = 120$ | 2        | 4.84      | room     |
| <b>BAPKOV</b>        | <i>bis(1-carboxybutane-1,4-diaminium) dichloride sulfat [bis(ornithine) dichloride sulfat]</i>             |                       |                    |                                                                                                      |          |           |          |
|                      | $C_{10}H_{28}Cl_2N_4O_8S_1$                                                                                | monoclinic            | $C2$               | $a = 13.9500(6)$<br>$b = 9.2300(4)$<br>$c = 9.3169(7)$<br>$\alpha = \gamma = 90, \beta = 127.260(1)$ | 2        | 2.48      | room     |
| <b>BAPKUB</b>        | <i>bis(1-carboxybutane-1,4-diaminium) dibromide sulfat [bis(ornithine) dibromide bis(sulfate)]</i>         |                       |                    |                                                                                                      |          |           |          |
|                      | $C_{10}H_{28}Br_2N_4O_8S_1$                                                                                | monoclinic            | $C2$               | $a = 14.129(2)$<br>$b = 9.389(1)$<br>$c = 9.437(3)$<br>$\alpha = \gamma = 90, \beta = 127.628(5)$    | 2        | 7.36      | room     |
| <b>BEZQOO</b>        | <i>L-Ornithinium hexafluorosilicate monohydrate</i>                                                        |                       |                    |                                                                                                      |          |           |          |
|                      | $C_5H_{16}F_6N_2O_3Si_1$                                                                                   | orthorhombic          | $P2_12_12_1$       | $a = 6.1310(1)$<br>$b = 9.8651(2)$<br>$c = 19.4339(3)$<br>$\alpha = \beta = \gamma = 90$             | 4        | 3.28      | room     |
| <b>BIHYEX</b>        | <i>L-Ornithinium sulfat monohydrate</i>                                                                    |                       |                    |                                                                                                      |          |           |          |
|                      | $C_5H_{16}N_2O_7S_1$                                                                                       | orthorhombic          | $P2_12_12_1$       | $a = 6.1589(2)$<br>$b = 9.682(6)$<br>$c = 18.714(6)$<br>$\alpha = \beta = \gamma = 90$               | 4        | 5.87      | room     |
| <b>CAPRAM</b>        | <i>L-Ornithine L-aspartate hemihydrate</i>                                                                 |                       |                    |                                                                                                      |          |           |          |
|                      | $C_9H_{20}N_3O_{6.499}$                                                                                    | monoclinic            | $C2$               | $a = 21.858(2)$<br>$b = 4.718(1)$                                                                    | 4        | 4.1       | room     |

---

$c = 18.046(2)$   
 $\alpha = \gamma = 90, \beta = 137.4(1)$

|                 |                                                                                                                                                                           |            |          |                                                                                                                         |   |      |      |  |
|-----------------|---------------------------------------------------------------------------------------------------------------------------------------------------------------------------|------------|----------|-------------------------------------------------------------------------------------------------------------------------|---|------|------|--|
| <b>EVIJAU</b>   | <i>bis(L-Ornithinium) chloride nitrate sulfate</i>                                                                                                                        |            |          |                                                                                                                         |   |      |      |  |
|                 | $C_{10}H_{28}Cl_1N_5O_{11}S_1$                                                                                                                                            | monoclinic | $C2$     | $a = 13.872(5)$<br>$b = 9.578(6)$<br>$c = 9.178(1)$<br>$\alpha = \gamma = 90, \beta = 125.350(14)$                      | 2 | 3.83 | room |  |
| <b>EXOFAY</b>   | <i>N-(9-Fluorenyl)methoxycarbonyl-L-ornithine hydrochloride diethyl ether clathrate</i>                                                                                   |            |          |                                                                                                                         |   |      |      |  |
|                 | $C_{20}H_{23}N_2O_4^+, Cl^-, C_4H_{10}O$                                                                                                                                  | monoclinic | $P2_1$   | $a = 5.094(1)$<br>$b = 15.499(3)$<br>$c = 15.575(3)$<br>$\alpha = \gamma = 90, \beta = 96.74(3)$                        | 2 | 5.43 | room |  |
| <b>GOTFAY</b>   | <i>1-carboxybutane-1,4-diaminium bis(2,4,6-trinitrophenolate) [L-ornithinium dipicrate]</i>                                                                               |            |          |                                                                                                                         |   |      |      |  |
|                 | $C_{17}H_{18}N_8O_{16}$                                                                                                                                                   | monoclinic | $P2_1$   | $a = 7.3909(4)$<br>$b = 14.0725(7)$<br>$c = 11.7089(6)$<br>$\alpha = \gamma = 90, \beta = 104.655(3)$                   | 2 | 3.49 | room |  |
| <b>IHEPES</b>   | <i>catena-[(5-ammonio-2-(difluoromethyl)norvalinato)-(m-chloro)-dichloro-copper monohydrate]<br/>[catena-[(m-efflornithine)-(m-chloro)-chloro-copper(ii) monohydrate]</i> |            |          |                                                                                                                         |   |      |      |  |
|                 | $(C_6H_{12}Cl_2CuF_2N_2O_2)_n \cdot H_2O$                                                                                                                                 | monoclinic | $Cc$     | $a = 13.130(1)$<br>$b = 12.186(1)$<br>$c = 8.193(<1)$<br>$\alpha = \gamma = 90, \beta = 118.36(<1)$                     | 4 | 1.58 | 100  |  |
| <b>JADGED</b>   | <i>2,5-diammoniopentanoate 4-carboxy-2-oxobutanoate</i>                                                                                                                   |            |          |                                                                                                                         |   |      |      |  |
|                 | $C_{10}H_{18}N_2O_7$                                                                                                                                                      | monoclinic | $P2_1$   | $a = 15.4326(3)$<br>$b = 5.2015(1)$<br>$c = 16.2067(3)$<br>$\alpha = \gamma = 90, \beta = 91.986(1)$                    | 4 | 4.7  | room |  |
| <b>*NAGLYC</b>  | <i>L-Ornithine L-aspartate monohydrate</i>                                                                                                                                |            |          |                                                                                                                         |   |      |      |  |
|                 | $C_9H_{21}N_3O_7$                                                                                                                                                         | triclinic  | $P-1$    | $a = 4.718(1)$<br>$b = 11.181(2)$<br>$c = 12.653(2)$<br>$\alpha = 102.8(1)$<br>$\beta = 100.7(1)$<br>$\gamma = 77.8(1)$ | 2 | -    | room |  |
| <b>ORNBDL01</b> | <i>DL-Ornithine hydrobromide</i>                                                                                                                                          |            |          |                                                                                                                         |   |      |      |  |
|                 | $C_5H_{13}N_2O_2^+ Br^-$                                                                                                                                                  | monoclinic | $P2_1/c$ | $a = 12.180(20)$<br>$b = 7.880(20)$<br>$c = 11/610(20)$<br>$\alpha = \gamma = 90, \beta = 133.65(33)$                   | 4 | 13   | room |  |
| <b>ORNBDL10</b> | <i>DL-Ornithine hydrobromide</i>                                                                                                                                          |            |          |                                                                                                                         |   |      |      |  |
|                 |                                                                                                                                                                           | monoclinic | $P2_1/c$ | $a = 9.388(9)$<br>$b = 7.901(8)$<br>$c = 11.663(13)$<br>$\alpha = \gamma = 90, \beta = 109.83(25)$                      | 4 | 7.3  | room |  |
| <b>ORNHCL</b>   | <i>L-Ornithine hydrochloride</i>                                                                                                                                          |            |          |                                                                                                                         |   |      |      |  |
|                 | $C_5H_{13}N_2O_2^+ Cl^-$                                                                                                                                                  | monoclinic | $P2_1$   | $a = 10.005(10)$<br>$b = 7.992(6)$<br>$c = 5.000(10)$<br>$\alpha = \gamma = 90, \beta = 96.98(5)$                       | 2 | 4.0  | room |  |
| <b>ORNHCL11</b> | <i>L-Ornithine hydrochloride</i>                                                                                                                                          |            |          |                                                                                                                         |   |      |      |  |
|                 | $C_5H_{13}N_2O_2^+, Cl^-$                                                                                                                                                 | monoclinic | $P2_1$   | $a = 4.990$<br>$b = 8.00$<br>$c = 10.00$<br>$\alpha = \gamma = 90, \beta = 97.00$                                       | 2 | 6.4  | room |  |
| <b>ORNHCL12</b> |                                                                                                                                                                           | monoclinic | $P2_1$   | $a = 9.948(1)$<br>$b = 7.964(1)$<br>$c = 4.983(1)$                                                                      | 2 | 0.89 | 100  |  |

---



|                 |                                                                                                                             |            |        |                                                                                                                       |   |       |      |
|-----------------|-----------------------------------------------------------------------------------------------------------------------------|------------|--------|-----------------------------------------------------------------------------------------------------------------------|---|-------|------|
|                 |                                                                                                                             |            |        | $\alpha = \gamma = 90, \beta = 83.13(1)$                                                                              |   |       |      |
| <b>ORNHCL13</b> |                                                                                                                             | monoclinic | $P2_1$ | $a = 9.948(1)$<br>$b = 7.964(1)$<br>$c = 4.983(1)$<br>$\alpha = \gamma = 90, \beta = 83.13(1)$                        | 2 | 1.15  | 100  |
| <b>ORNSEB</b>   | <i>DL-Ornithinium hexabromo-selenium</i><br>$C_5H_{14}Br_6N_2O_2Se$                                                         | triclinic  | $P^*$  | $a = 10.89(2)$<br>$b = 7.45(1)$<br>$c = 11.84(2)$<br>$\alpha = 101.8(3)$<br>$\beta = 100.5(3)$<br>$\gamma = 103.3(3)$ | 2 | -     | room |
| <b>PUYVUA</b>   | <i>L-Ornithine nitrate</i><br>$C_5H_{13}N_3O_5$                                                                             | monoclinic | $P2_1$ | $a = 5.1944(6)$<br>$b = 7.803(1)$<br>$c = 11.050(1)$<br>$\alpha = \gamma = 90, \beta = 98.75(1)$                      | 2 | 3.7   | room |
| <b>*QQAOJ</b>   | <i>L-Ornithine hydrobromide</i><br>$C_5H_{13}BrN_2O_2$                                                                      | monoclinic | $P2_1$ | $a = 10.21$<br>$b = 8.04$<br>$c = 4.98$<br>$\alpha = 90$<br>$\beta = 97.0$<br>$\gamma = 90$                           | 2 | -     | room |
| <b>TEFMIA</b>   | <i>L-Ornithine dipicrate</i><br>$C_{17}H_{18}N_8O_{16}$                                                                     | monoclinic | $P2_1$ | $a = 11.692(2)$<br>$b = 14.058(3)$<br>$c = 7.364(1)$<br>$\alpha = \gamma = 90, \beta = 104.65(2)$                     | 2 | 6.4   | room |
| <b>VUYHII</b>   | <i>L-Ornithine D-aspartate monohydrate</i><br>$C_9H_{21}N_3O_7$                                                             | monoclinic | $P2_1$ | $a = 5.118(1)$<br>$b = 7.881(2)$<br>$c = 16.025(2)$<br>$\alpha = \gamma = 90, \beta = 91.78(2)$                       | 2 | 5.5   | room |
| <b>YIGMAE</b>   | <i>bis(2,5-diammoniopentanoate) hexafluorosilicate [bis(L-ornithine) hexafluorosilicate]</i><br>$C_{10}H_{26}F_6N_4O_4Si_1$ | monoclinic | $P2_1$ | $a = 9.846(2)$<br>$b = 20.641(4)$<br>$c = 13.789(3)$<br>$\alpha = \gamma = 90, \beta = 110.67(3)$                     | 6 | 10.69 | room |

\*worse quality (or containing errors) structures

**Table S2.** Cartesian coordinates (Å) of ornithine derivative (**1**), optimized at the M06/6-311++G(d,p) level of theory.

| <b>The M06 optimized ornithine derivative (1) in gas phase</b> |          |          |           |
|----------------------------------------------------------------|----------|----------|-----------|
| 8                                                              | 4.728254 | 7.994915 | 18.870503 |
| 8                                                              | 4.723641 | 5.275528 | 16.032248 |
| 1                                                              | 4.807266 | 4.362551 | 15.748489 |
| 8                                                              | 2.814411 | 3.547106 | 18.486564 |
| 8                                                              | 4.897736 | 2.852706 | 18.078967 |
| 1                                                              | 4.432576 | 2.004487 | 18.053636 |
| 8                                                              | 3.352609 | 6.966873 | 22.929590 |
| 7                                                              | 3.505424 | 6.102550 | 18.593343 |

|   |           |           |           |
|---|-----------|-----------|-----------|
| 1 | 2.587087  | 5.680333  | 18.649001 |
| 7 | 5.509407  | 6.799240  | 22.286432 |
| 1 | 6.352573  | 7.291564  | 22.037719 |
| 6 | 2.362523  | 8.201552  | 18.946922 |
| 6 | 1.145640  | 7.759553  | 18.429754 |
| 1 | 1.091545  | 6.843551  | 17.847608 |
| 6 | -0.006732 | 8.507801  | 18.615582 |
| 1 | -0.947837 | 8.160951  | 18.200360 |
| 6 | 0.044898  | 9.699263  | 19.326386 |
| 1 | -0.860198 | 10.279673 | 19.478522 |
| 6 | 1.255835  | 10.150168 | 19.834656 |
| 1 | 1.305143  | 11.081084 | 20.391857 |
| 6 | 2.410703  | 9.411341  | 19.635625 |
| 1 | 3.365509  | 9.759367  | 20.018423 |
| 6 | 3.641563  | 7.441942  | 18.795109 |
| 6 | 4.612738  | 5.170460  | 18.476930 |
| 6 | 5.451855  | 5.458897  | 17.222391 |
| 1 | 6.352545  | 4.832395  | 17.248045 |
| 1 | 5.761284  | 6.505756  | 17.266837 |
| 6 | 3.980135  | 3.795612  | 18.352734 |
| 6 | 5.511347  | 5.188485  | 19.727871 |
| 1 | 6.362537  | 4.516662  | 19.559819 |
| 1 | 5.903040  | 6.208748  | 19.803728 |
| 6 | 4.785041  | 4.816184  | 21.010887 |
| 1 | 4.682851  | 3.725499  | 21.096320 |
| 1 | 3.767244  | 5.224566  | 21.007172 |
| 6 | 5.490880  | 5.349262  | 22.249637 |
| 1 | 6.529641  | 5.000652  | 22.287379 |
| 1 | 14.985577 | 4.985612  | 23.150145 |
| 6 | 4.386047  | 7.510251  | 22.583515 |
| 6 | 4.492652  | 8.997843  | 22.468934 |
| 6 | 5.441091  | 9.640104  | 21.675598 |
| 1 | 6.143289  | 9.068637  | 21.074777 |
| 6 | 5.448741  | 11.024148 | 21.577008 |
| 1 | 6.178612  | 11.514823 | 20.940940 |
| 6 | 4.510252  | 11.775823 | 22.271221 |
| 1 | 4.517235  | 12.858922 | 22.192292 |
| 6 | 3.557079  | 11.140135 | 23.057733 |
| 1 | 2.818489  | 11.725660 | 23.597040 |
| 6 | 3.544583  | 9.757976  | 23.149688 |
| 1 | 2.796141  | 9.236890  | 23.738366 |

**The M06 optimized ornithine derivative (1) in solvated state (CPCM method)**

|   |           |           |           |
|---|-----------|-----------|-----------|
| 8 | 0.166469  | 0.311465  | 1.669694  |
| 8 | 3.926055  | 1.184671  | 2.023178  |
| 1 | 4.860711  | 1.062531  | 1.833319  |
| 8 | 3.841272  | 0.685312  | -1.488838 |
| 8 | 4.858234  | 0.890765  | -0.271788 |
| 1 | 5.551262  | 0.771413  | -0.939300 |
| 8 | -1.352595 | -1.383301 | -2.146508 |
| 7 | 1.740567  | 0.799983  | 0.104828  |

|   |           |           |           |
|---|-----------|-----------|-----------|
| 1 | 1.945808  | 1.316936  | -0.742285 |
| 7 | -0.597009 | -2.750403 | -0.513749 |
| 1 | -0.790847 | 3.179100  | 0.378827  |
| 6 | -0.338843 | 2.025803  | 0.107317  |
| 6 | 0.156311  | 3.126275  | -0.591688 |
| 1 | 1.226602  | 3.281838  | -0.695086 |
| 6 | -0.715707 | 4.060572  | -1.132408 |
| 1 | -0.321500 | 4.920661  | -1.664202 |
| 6 | -2.087970 | 3.897672  | -0.989559 |
| 1 | -2.768354 | 4.625822  | -1.420222 |
| 6 | -2.587293 | 2.805903  | -0.289310 |
| 1 | -3.658889 | 2.671505  | -0.174988 |
| 6 | -1.716485 | 1.881427  | 0.266484  |
| 1 | -2.095601 | 1.026210  | 0.818821  |
| 6 | 0.538841  | 0.974101  | 0.709183  |
| 6 | 2.707861  | -0.234613 | 0.442967  |
| 6 | 3.253377  | -0.045096 | 1.865289  |
| 1 | 3.901578  | -0.893001 | 2.112639  |
| 1 | 2.404307  | -0.054326 | 2.552261  |
| 6 | 3.847160  | -0.073768 | -0.554447 |
| 6 | 2.107458  | -1.643759 | 0.289136  |
| 1 | 2.845212  | -2.381529 | 0.625757  |
| 1 | 1.257439  | -1.694877 | 0.978395  |
| 6 | 1.656897  | -1.954149 | -1.130530 |
| 1 | 2.518341  | -2.218919 | -1.757805 |
| 1 | 1.200673  | -1.065017 | -1.583331 |
| 6 | 0.642624  | -3.086355 | -1.193611 |
| 1 | 1.039673  | -3.990904 | -0.722492 |
| 1 | 0.419973  | -3.329277 | -2.237652 |
| 6 | -1.485438 | -1.870528 | -1.027988 |
| 6 | -2.642853 | -1.508446 | -0.154468 |
| 6 | -2.583970 | -1.567633 | 1.237538  |
| 1 | -1.672540 | -1.878250 | 1.741014  |
| 6 | -3.668475 | -1.157861 | 2.000753  |
| 1 | -3.608644 | -1.192348 | 3.083907  |
| 6 | -4.819377 | -0.688563 | 1.380428  |
| 1 | -5.665940 | -0.366918 | 1.979242  |
| 6 | -4.883231 | -0.625070 | -0.006939 |
| 1 | -5.781002 | -0.257289 | -0.493987 |
| 6 | -3.797632 | -1.027382 | -0.768811 |
| 1 | -3.828176 | -0.969633 | -1.852301 |

**Table S3**

Gemetrical parameters (in Å and in o) for the  $\pi$ -stacking moieties involved in the  $\pi$ - $\pi$  interactions for studied compounds.

| CgI-CgJ <sup>a,b</sup> | symmetry | Cg <sup>c</sup> ...Cg <sup>c</sup> | Cg(I)-perp <sup>d</sup> | Cg(J)-per <sup>pe</sup> | $\alpha^f$ | $\beta^g$ | $\gamma^f$ |
|------------------------|----------|------------------------------------|-------------------------|-------------------------|------------|-----------|------------|
| (1)                    |          |                                    |                         |                         |            |           |            |

|                      |                    |            |            |             |           |      |      |
|----------------------|--------------------|------------|------------|-------------|-----------|------|------|
| Cg1 <sup>⋯</sup> Cg1 | -x, 1/2+y, 3/2-z   | 5.8060(19) | 0.7192(13) | -4.4381(13) | 62.45(15) | 40.1 | 82.9 |
| Cg1 <sup>⋯</sup> Cg2 | -1/2+x, 3/2-y, 2-z | 5.744(9)   | 1.9329(13) | 5.054(10)   | 45        | 28.4 | 70.3 |
| Cg2 <sup>⋯</sup> Cg2 | -1/2+x, 5/2-y, 2-z | 5.843(14)  | 2.726(11)  | -5.293(11)  | 52        | 25.1 | 62.2 |
| <b>EXOFAY*</b>       |                    |            |            |             |           |      |      |
| Cg1 <sup>⋯</sup> Cg2 | 1+x, y, z          | 4.048(6)   | -3.480(4)  | 3.558(4)    | 2.3(5)    | 28.5 | 30.7 |
| Cg1 <sup>⋯</sup> Cg3 | -1+x, y, z         | 4.838(7)   | 3.516(4)   | -3.549(6)   | 1.1(6)    | 42.8 | 43.4 |
| Cg2 <sup>⋯</sup> Cg1 | -1+x, y, z         | 4.049(6)   | 3.559(4)   | -3.480(4)   | 2.3(5)    | 30.7 | 28.5 |
| Cg2 <sup>⋯</sup> Cg3 | -1+x, y, z         | 4.652(7)   | 3.549(4)   | -3.431(6)   | 2.2(6)    | 42.5 | 40.3 |
| Cg3 <sup>⋯</sup> Cg1 | 1+x, y, z          | 4.837(7)   | -3.549(6)  | 3.516(4)    | 1.1(6)    | 43.4 | 42.8 |
| Cg3 <sup>⋯</sup> Cg2 | 1+x, y, z          | 4.651(7)   | -3.431(6)  | 3.548(4)    | 2.2(6)    | 40.3 | 42.5 |
| <b>GOTFAY</b>        |                    |            |            |             |           |      |      |
| Cg1 <sup>⋯</sup> Cg2 | x, y, z            | 4.2034(10) | 3.4096(8)  | -3.7073(7)  | 9.91(8)   | 28.1 | 35.8 |
| Cg2 <sup>⋯</sup> Cg1 | -1+x, y, z         | 4.2121(10) | 3.6061(7)  | -3.6559(8)  | 9.91(8)   | 29.8 | 31.1 |
| <b>TEFMIA</b>        |                    |            |            |             |           |      |      |
| Cg1 <sup>⋯</sup> Cg2 | -x, -1/2+y, 2-z    | 4.191(3)   | 3.6832(17) | 3.3926(17)  | 9.78(19)  | 36   | 28.5 |

**Table S4**

Gemetrical parameters (in Å and in °) for the other  $\pi$ -stacking moieties for studied compounds.

| Y-X <sup>⋯</sup> Cg      | symmetry          | X(H) <sup>⋯</sup> Cg | Y-X <sup>⋯</sup> Cg | Y <sup>⋯</sup> Cg |
|--------------------------|-------------------|----------------------|---------------------|-------------------|
| <b>(1)</b>               |                   |                      |                     |                   |
| C14-O5 <sup>⋯</sup> Cg1  | 1/2+x, 3/2-y, 2-z | 3.545(3)             | 99.27(19)           | 3.941(3)          |
| <b>EXOFAY</b>            |                   |                      |                     |                   |
| C8-H15 <sup>⋯</sup> Cg2  | 1+x, y, z         | 2.82                 | 143                 | 3.649(9)          |
| C22-H27 <sup>⋯</sup> Cg3 | -x, -1/2+y, 2-z   | 2.99                 | 130                 | 3.69(4)           |
| <b>GOTFAY</b>            |                   |                      |                     |                   |
| N3-O6 <sup>⋯</sup> Cg2   | 1+x, y, z         | 3.769(3)             | 73.57(16)           | 3.618(2)          |
| <b>TEFMIA</b>            |                   |                      |                     |                   |
| N5-O11 <sup>⋯</sup> Cg1  | -x, 1/2+y, 1-z    | 3.763(6)             | 74.0(3)             | 3.621(5)          |
| N5-O12 <sup>⋯</sup> Cg1  | -x, 1/2+y, 2-z    | 3.996(7)             | 81.4(4)             | 4.002(5)          |

<sup>c</sup> distance between ring centroids [Å], <sup>d</sup> perpendicular distance of Cg(I) on ring J [Å], <sup>e</sup> perpendicular distance of Cg(J) on ring I [Å], <sup>f</sup> dihedral angle between planes I and J [°], <sup>g</sup> angle between the centroid vector Cg(I)-Cg(J) and normal to plane I [°], <sup>h</sup> angle between the centroid vector Cg(I)-Cg(J) and normal to plane J [°].

**Table S5.** Galley of ornithine-based synthons (selected, below 20-membered). Synthons without participation of ornithine moiety are grey.

| <i>name</i> | <i>synthon</i>                   | <i>interactions</i>                                                                                                                                        |                                                                                                                                             |
|-------------|----------------------------------|------------------------------------------------------------------------------------------------------------------------------------------------------------|---------------------------------------------------------------------------------------------------------------------------------------------|
| <b>(1)</b>  | C(4)                             | <b>N2</b> <sub>ornithine-H20</sub> (-NH)···O5(-C=O)                                                                                                        |                                                                                                                                             |
|             | C(6)                             | <b>O4</b> <sub>ornithine-H41</sub> (-COOH)···O2(-OH)                                                                                                       |                                                                                                                                             |
|             | C(7)                             | O2-H21(-OH)···O1(-C=O)                                                                                                                                     |                                                                                                                                             |
|             | C(9)                             | C3-H3(-Carom.)···O3(-COOH)                                                                                                                                 |                                                                                                                                             |
|             | level 2                          | C <sub>2</sub> <sup>2</sup> (9)                                                                                                                            | O2-H21(-OH)···O1(-C=O) & <b>O4</b> <sub>ornithine-H41</sub> (-COOH)···O2(-OH)                                                               |
|             | C <sub>2</sub> <sup>2</sup> (12) | O2-H21(-OH)···O1(-C=O) & C3-H3(-Carom.)···O3(-COOH)                                                                                                        |                                                                                                                                             |
|             | C <sub>2</sub> <sup>2</sup> (13) | <b>O4</b> <sub>ornithine-H41</sub> (-COOH)···O2(-OH) & C3-H3(-Carom.)···O3(-COOH)                                                                          |                                                                                                                                             |
|             | C <sub>2</sub> <sup>2</sup> (15) | <b>O4</b> <sub>ornithine-H41</sub> (-COOH)···O2(-OH) & C3-H3(-Carom.)···O3(-COOH)                                                                          |                                                                                                                                             |
|             | C <sub>2</sub> <sup>2</sup> (16) | O2-H21(-OH)···O1(-C=O) & C3-H3(-Carom.)···O3(-COOH)                                                                                                        |                                                                                                                                             |
|             | C <sub>2</sub> <sup>2</sup> (18) | <b>O4</b> <sub>ornithine-H41</sub> (-COOH)···O2(-OH) & <b>N2</b> <sub>ornithine-H20</sub> (-NH)···O5(-C=O)                                                 |                                                                                                                                             |
|             | C <sub>2</sub> <sup>2</sup> (19) | O2-H21(-OH)···O1(-C=O) & <b>N2</b> <sub>ornithine-H20</sub> (-NH)···O5(-C=O)                                                                               |                                                                                                                                             |
|             | R <sub>2</sub> <sup>2</sup> (13) | O2-H21(-OH)···O1(-C=O) & <b>O4</b> <sub>ornithine-H41</sub> (-COOH)···O2(-OH)                                                                              |                                                                                                                                             |
| <b>(2)</b>  | S(6)                             | C6-H6A···O2                                                                                                                                                |                                                                                                                                             |
|             | C(5)                             | *N9-H9B···O2                                                                                                                                               |                                                                                                                                             |
|             |                                  | *N9-H9C···O2                                                                                                                                               |                                                                                                                                             |
|             | C(6)                             | C6-H6A···O10                                                                                                                                               |                                                                                                                                             |
|             | C(8)                             | N8-H8B···O10                                                                                                                                               |                                                                                                                                             |
|             | D(2)                             | *N9-H9A···C11                                                                                                                                              |                                                                                                                                             |
|             |                                  | *N8-H8A···C11                                                                                                                                              |                                                                                                                                             |
|             |                                  | *N8-H8C···C11                                                                                                                                              |                                                                                                                                             |
|             |                                  | *C7-H7A···C11                                                                                                                                              |                                                                                                                                             |
|             |                                  | *C6-H6B···C11                                                                                                                                              |                                                                                                                                             |
|             |                                  | *C5-H5A···C11                                                                                                                                              |                                                                                                                                             |
|             | Level 2                          | C <sub>2</sub> <sup>1</sup> (4)                                                                                                                            | *N9-H9B···O2 & N9-H9C···O2<br>*N8-H8A···C11 & N8-H8C···C11                                                                                  |
|             |                                  | C <sub>2</sub> <sup>1</sup> (5)                                                                                                                            | *N8-H8A···C11 & C7-H7A···C11<br>*N8-H8C···C11 & C7-H7A···C11<br>*C6-H6B···C11 & (C7-H7A···C11) <sub>2</sub><br>*C5-H5A···C11 & C6-H6B···C11 |
|             | C <sub>2</sub> <sup>1</sup> (6)  | *N8-H8C···C11 & C6-H6B···C11<br>*C5-H5A···C11 & C7-H7A···C11                                                                                               |                                                                                                                                             |
|             | C <sub>2</sub> <sup>1</sup> (7)  | *N9-H9A···C11 & C6-H6B···C11<br>*N8-H8A···C11 & C5-H5A···C11<br>*N8-H8C···C11 & C5-H5A···C11                                                               |                                                                                                                                             |
|             | C <sub>2</sub> <sup>1</sup> (8)  | N9-H9A···C11 & C7-H7A···C11                                                                                                                                |                                                                                                                                             |
|             | C <sub>2</sub> <sup>1</sup> (9)  | *N9-H9A···C11 & N8-H8A···C11<br>*N8-H8C···C11 & N9-H9A···C11                                                                                               |                                                                                                                                             |
|             | C <sub>2</sub> <sup>2</sup> (9)  | *N9-H9B···O2 & C6-H6A···O10<br>*C7-H7A···C11 & C6-H6A···O10                                                                                                |                                                                                                                                             |
|             | C <sub>2</sub> <sup>2</sup> (10) | N9-H9B···O2 & N9-H9C···O2                                                                                                                                  |                                                                                                                                             |
|             | C <sub>2</sub> <sup>2</sup> (11) | *N8-H8B···O10 & N9-H9B···O2<br>*N9-H9B···O2 & C6-H6A···O10<br>*N8-H8B···C11 & N9-H9C···O2                                                                  |                                                                                                                                             |
|             | C <sub>2</sub> <sup>2</sup> (13) | N8-H8B···O10 & N9-H9B···O2                                                                                                                                 |                                                                                                                                             |
|             | C <sub>2</sub> <sup>2</sup> (14) | N8-H8B···O10 & C6-H6A···O10                                                                                                                                |                                                                                                                                             |
|             | C <sub>4</sub> <sup>3</sup> (14) | (N9-H9C···O2) <sub>2</sub> & (N9-H9B···O2) <sub>2</sub>                                                                                                    |                                                                                                                                             |
|             | C <sub>4</sub> <sup>4</sup> (20) | (C6-H6A···O10) <sub>2</sub> & (N9-H9B···O2) <sub>2</sub>                                                                                                   |                                                                                                                                             |
|             | R <sub>2</sub> <sup>1</sup> (6)  | *(N9-H9A···C11) <sub>2</sub> & C5-H5A···C11<br>*N8-H8A···C11 & C6-H6B···C11<br>*N8-H8B···O10 & C6-H6A···O10                                                |                                                                                                                                             |
|             | R <sub>2</sub> <sup>2</sup> (11) | N9-H9C···O2 & C6-H6A···O10                                                                                                                                 |                                                                                                                                             |
|             | R <sub>2</sub> <sup>2</sup> (13) | N8-H8B···O10 & N9-H9C···O2                                                                                                                                 |                                                                                                                                             |
|             | R <sub>4</sub> <sup>3</sup> (14) | (N9-H9B···O2) <sub>2</sub> & N9-H9C···O2                                                                                                                   |                                                                                                                                             |
|             | R <sub>4</sub> <sup>4</sup> (20) | (N9-H9B···O2) <sub>2</sub> & (C6-H6A···O10) <sub>2</sub>                                                                                                   |                                                                                                                                             |
|             | D <sub>3</sub> <sup>3</sup> (10) | *(N9-H9A···C11) <sub>2</sub> & N9-H9B···O2<br>*(N9-H9A···C11) <sub>2</sub> & N9-H9C···O2                                                                   |                                                                                                                                             |
|             | D <sub>3</sub> <sup>3</sup> (11) | *C6-H6A···O10 & (C6-H6B···C11) <sub>2</sub><br>*(C5-H5A···C11) <sub>2</sub> & C6-H6A···O10                                                                 |                                                                                                                                             |
|             | D <sub>3</sub> <sup>3</sup> (12) | *N9-H9B···O2 & (C5-H5A···C11) <sub>2</sub><br>*N9-H9C···O2 & (C5-H5A···C11) <sub>2</sub>                                                                   |                                                                                                                                             |
|             | D <sub>3</sub> <sup>3</sup> (13) | *N9-H9A···C11 & C6-H6A···O10<br>*N8-H8A···C11 & N8-H8B···O10<br>*N8-H8B···O10 & (N8-H8C···C11) <sub>2</sub><br>*N8-H8B···O10 & (C7-H7A···C11) <sub>2</sub> |                                                                                                                                             |

|               |                                  |                                                                                                                                                                                                                                                                                                                                                                                                                                                         |
|---------------|----------------------------------|---------------------------------------------------------------------------------------------------------------------------------------------------------------------------------------------------------------------------------------------------------------------------------------------------------------------------------------------------------------------------------------------------------------------------------------------------------|
|               |                                  | *N8-H8B...O10 & C6-H6A...O10 & C6-H6B...C11<br>*N8-H8B...O10 & (C5-H5A...C11) <sub>2</sub><br>*C6-H6A...O10 & (C7-H7A...C11) <sub>2</sub>                                                                                                                                                                                                                                                                                                               |
|               | D <sub>3</sub> <sup>3</sup> (14) | *N9-H9B...O2 & (C6-H6B...C11) <sub>2</sub><br>*N9-H9C...O2 & (C6-H6B...C11) <sub>2</sub>                                                                                                                                                                                                                                                                                                                                                                |
|               | D <sub>3</sub> <sup>3</sup> (15) | *(N9-H9A...C11) <sub>2</sub> & N8-H8B...O10<br>*(N8-H8A...C11) <sub>2</sub> & C6-H6A...O10<br>*(N8-H8C...C11) <sub>2</sub> & C6-H6A...O10                                                                                                                                                                                                                                                                                                               |
|               | D <sub>3</sub> <sup>3</sup> (16) | *N9-H9B...O2 & (C7-H7A...C11) <sub>2</sub><br>*(N8-H8C...C11 & N9-H9C...O2 & C7-H7A...C11                                                                                                                                                                                                                                                                                                                                                               |
|               | D <sub>3</sub> <sup>3</sup> (18) | *(N8-H8A...C11) <sub>2</sub> & N9-H9B...O2<br>*(N8-H8C...C11) <sub>2</sub> & N9-H9B...O2<br>*(N8-H8A...C11) <sub>2</sub> & N9-H9C...O2                                                                                                                                                                                                                                                                                                                  |
| <b>BAPKIB</b> | D(2)                             | *O1-H1(-COOH)...O8(SO4)<br>*N1-H3(-NH3+)...O6A(SO4)<br>*N1-H4(-NH3+)...O8A(SO4)<br>*N2-H12(-NH3+)...O6A(SO4)<br>*N2-H13(-NH3+)...O3(-NO3-)<br>*N2-H14(-NH3+)...O4(-NO3-)<br>*C2-H5(-CH)...O5(SO4)<br>*C5-H10(-CH2)...O7(SO4)                                                                                                                                                                                                                            |
|               | D <sub>2</sub> <sup>1</sup> (3)  | *(C2-H2(-CH)...O5(SO4)) <sub>2</sub><br>*(C5-H10(-CH2)...O7(SO4)) <sub>2</sub>                                                                                                                                                                                                                                                                                                                                                                          |
|               | D <sub>2</sub> <sup>2</sup> (5)  | *O1-H1(-COOH)...O8(SO4) & O1-H1(-COOH)...O8A(SO4)<br>*N1-H3(-NH3+)...O6A(SO4) & N1-H3(-NH3+)...O6(SO4)<br>*N1-H4(-NH3+)...O8A(SO4) & N1-H4(-NH3+)...O8(SO4)<br>*N2-H12(-NH3+)...O6(SO4) & N2-H12(-NH3+)...O6A(SO4)<br>*N2-H13(-NH3+)...O3A(-NO3-) & N2-H13(-NH3+)...O3(-NO3-)<br>*N2-H14(-NH3+)...O4(-NO3-) & N2-H14(-NH3+)...O4A(-NO3-)                                                                                                                |
|               | R <sub>3</sub> <sup>3</sup> (15) | (N1-H5(-NH3+)...O2(-COOH) ornithine) <sub>2</sub>                                                                                                                                                                                                                                                                                                                                                                                                       |
| level 2       | C <sub>2</sub> <sup>1</sup> (9)  | N1-H3(-NH3+)...O6A(SO4) & N2-H12(-NH3+)...O6A(SO4)                                                                                                                                                                                                                                                                                                                                                                                                      |
|               | C <sub>2</sub> <sup>2</sup> (9)  | O1-H1(-COOH)...O8(SO4) & N1-H4(-NH3+)...O8A(SO4)                                                                                                                                                                                                                                                                                                                                                                                                        |
|               | C <sub>2</sub> <sup>2</sup> (10) | N2-H12(-NH3+)...O6(SO4) & C2-H2(-CH)...O5(SO4)                                                                                                                                                                                                                                                                                                                                                                                                          |
|               | C <sub>2</sub> <sup>2</sup> (11) | *O1-H1(-COOH)...O8(SO4) & C5-H10(-CH2)...O7(SO4)<br>*N1-H3(-NH3+)...O6A(SO4) & N2-H12(-NH3+)...O6(SO4)                                                                                                                                                                                                                                                                                                                                                  |
|               | C <sub>2</sub> <sup>2</sup> (14) | (C2-H2(-CH)...O5(SO4)) <sub>2</sub> & (C5-H10(-CH2)...O7(SO4)) <sub>2</sub>                                                                                                                                                                                                                                                                                                                                                                             |
|               | C <sub>3</sub> <sup>2</sup> (9)  | N1-H5(-NH3+)...O2(-COOH) ornithine & (C2-H2(-CH)...O5(SO4)) <sub>2</sub>                                                                                                                                                                                                                                                                                                                                                                                |
|               | C <sub>3</sub> <sup>2</sup> (15) | N1-H5(-NH3+)...O2(-COOH) ornithine & (C5-H10(-CH2)...O7(SO4)) <sub>2</sub>                                                                                                                                                                                                                                                                                                                                                                              |
|               | C <sub>3</sub> <sup>3</sup> (11) | *N1-H5(-NH3+)...O2(-COOH) ornithine & N1-H3(-NH3+)...O6(SO4) & N1-H3(-NH3+)...O6A(SO4)<br>*N1-H4(-NH3+)...O8(SO4) & N1-H4(-NH3+)...O8A(SO4) & N1-H5(-NH3+)...O2(-COOH) ornithine                                                                                                                                                                                                                                                                        |
|               | C <sub>3</sub> <sup>3</sup> (19) | *N1-H5(-NH3+)...O2(-COOH) ornithine & N2-H13(-NH3+)...O3(-NO3-) & N2-H13(-NH3+)...O3B(-NO3-)<br>*N2-H14(-NH3+)...O1(-COOH) ornithine & N2-H14(-NH3+)...O4B(-NO3-) & N1-H5(-NH3+)...O2(-COOH) ornithine                                                                                                                                                                                                                                                  |
|               | C <sub>3</sub> <sup>3</sup> (12) | *N1-H4(-NH3+)...O8A(SO4) & N1-H4(-NH3+)...O8B(SO4) & (C2-H2(-CH)...O5(SO4)) <sub>2</sub><br>*N2-H12(-NH3+)...O6B(SO4) & (C5-H10(-CH2)...O7(SO4)) <sub>2</sub><br>*N2-H14(-NH3+)...O4(-NO3-) & (C5-H10(-CH2)...O7(SO4)) <sub>2</sub>                                                                                                                                                                                                                     |
|               | C <sub>3</sub> <sup>3</sup> (14) | O1-H1(-COOH)...O8(SO4) & O1-H1(-COOH)...O8A(SO4) & (C2-H2(-CH)...O5(SO4)) <sub>2</sub>                                                                                                                                                                                                                                                                                                                                                                  |
|               | C <sub>3</sub> <sup>3</sup> (18) | *N2-H13(-NH3+)...O3(-NO3-) & N2-H13(-NH3+)...O3A(-NO3-) & (C2-H2(-CH)...O5(SO4)) <sub>2</sub><br>*N1-H3(-NH3+)...O6(SO4) & N1-H3(-NH3+)...O6A(SO4) & (C5-H10(-CH2)...O7(SO4)) <sub>2</sub>                                                                                                                                                                                                                                                              |
|               | C <sub>3</sub> <sup>3</sup> (20) | O1-H1(-COOH)...O8(SO4) & (C5-H10(-CH2)...O7(SO4)) <sub>2</sub>                                                                                                                                                                                                                                                                                                                                                                                          |
|               | C <sub>4</sub> <sup>4</sup> (12) | *N1-H3(-NH3+)...O6(SO4) & N1-H3(-NH3+)...O6A(SO4) & N1-H4(-NH3+)...O8(SO4) & N1-H4(-NH3+)...O8A(SO4)<br>*N2-H12(-NH3+)...O6(SO4) & N2-H12(-NH3+)...O6A(SO4) & N2-H13(-NH3+)...O3(-NO3-) & N2-H13(-NH3+)...O3(-NO3-)<br>*N2-H12(-NH3+)...O6(SO4) & N2-H12(-NH3+)...O6A(SO4) & N2-H14(-NH3+)...O4(-NO3-) & N2-H14(-NH3+)...O4B(-NO3-)<br>*N2-H13(-NH3+)...O3(-NO3-) & N2-H13(-NH3+)...O3A(-NO3-) & N2-H14(-NH3+)...O4(-NO3-) & N2-H14(-NH3+)...O4A(-NO3-) |
|               | C <sub>4</sub> <sup>4</sup> (18) | *N1-H3(-NH3+)...O6A(SO4) & N1-H3(-NH3+)...O6B(SO4) & O1-H1(-COOH)...O8(SO4) & O1-H1(-COOH)...O8A(SO4)<br>*O1-H1(-COOH)...O8(SO4) & O1-H1(-COOH)...O8A(SO4) & N1-H5(-NH3+)...O2(-COOH)<br>*N2-H12(-NH3+)...O6B(SO4) & (C2-H2(-CH)...O5(SO4)) <sub>2</sub> & N2-H12(-NH3+)...O6A(SO4)                                                                                                                                                                     |
|               | R <sub>2</sub> <sup>2</sup> (7)  | N1-H3(-NH3+)...O6A(SO4) & C2-H5(-CH)...O5(SO4)                                                                                                                                                                                                                                                                                                                                                                                                          |
|               | R <sub>2</sub> <sup>2</sup> (10) | N1-H4(-NH3+)...O8A(SO4) & C5-H10(-CH2)...O7(SO4)                                                                                                                                                                                                                                                                                                                                                                                                        |
|               | R <sub>3</sub> <sup>3</sup> (19) | N1-H5(-NH3+)...O2(-COOH) ornithine & N2-H12(-NH3+)...O6(SO4) & N2-H12(-NH3+)...O6A(SO4)                                                                                                                                                                                                                                                                                                                                                                 |
|               | R <sub>3</sub> <sup>3</sup> (12) | N2-H13(-NH3+)...O3A(-NO3-) & (C5-H10(-CH2)...O7(SO4)) <sub>2</sub>                                                                                                                                                                                                                                                                                                                                                                                      |
|               | R <sub>3</sub> <sup>3</sup> (18) | N2-H14(-NH3+)...O4(-NO3-) & N2-H14(-NH3+)...O4A(-NO3-) & (C2-H5(-CH)...O5(SO4)) <sub>2</sub>                                                                                                                                                                                                                                                                                                                                                            |
|               | D <sub>2</sub> <sup>2</sup> (5)  | *N1-H4(-NH3+)...O8A(SO4) & N1-H3(-NH3+)...O6A(SO4)<br>*N2-H12(-NH3+)...O6A(SO4) & N2-H13(-NH3+)...O3(-NO3-)<br>*N2-H12(-NH3+)...O6A(SO4) & N2-H14(-NH3+)...O4(-NO3-)<br>*N2-H13(-NH3+)...O3(-NO3-) & N2-H14(-NH3+)...O4(-NO3-)                                                                                                                                                                                                                          |

|               |             |                                                                                                                                                                                                                                                                                                                                                                                                                                                                                                                                                                                                                                                                                                                                                                                                                                                                                                                                                                                                                                                                                                                                                                                                                                                                                                                                                                                                                                                                                                    |
|---------------|-------------|----------------------------------------------------------------------------------------------------------------------------------------------------------------------------------------------------------------------------------------------------------------------------------------------------------------------------------------------------------------------------------------------------------------------------------------------------------------------------------------------------------------------------------------------------------------------------------------------------------------------------------------------------------------------------------------------------------------------------------------------------------------------------------------------------------------------------------------------------------------------------------------------------------------------------------------------------------------------------------------------------------------------------------------------------------------------------------------------------------------------------------------------------------------------------------------------------------------------------------------------------------------------------------------------------------------------------------------------------------------------------------------------------------------------------------------------------------------------------------------------------|
|               | $D_2^2(6)$  | *N1-H4 <sub>(-NH3+)</sub> ... O8A <sub>(SO4)</sub> & C2-H5 <sub>(-CH)</sub> ... O5 <sub>(SO4)</sub><br>*N2-H12 <sub>(-NH3+)</sub> ... O6A <sub>(SO4)</sub> & C5-H10 <sub>(-CH2)</sub> ... O7 <sub>(SO4)</sub><br>*N2-H13 <sub>(-NH3+)</sub> ... O3 <sub>(-NO3-)</sub> & (C5-H10 <sub>(-CH2)</sub> ... O7 <sub>(SO4)</sub> ) <sub>2</sub><br>*N2-H14 <sub>(-NH3+)</sub> ... O4 <sub>(-NO3-)</sub> & (C5-H10 <sub>(-CH2)</sub> ... O7 <sub>(SO4)</sub> ) <sub>2</sub>                                                                                                                                                                                                                                                                                                                                                                                                                                                                                                                                                                                                                                                                                                                                                                                                                                                                                                                                                                                                                                |
|               | $D_2^2(7)$  | O1-H1 <sub>(-COOH)</sub> ... O8 <sub>(SO4)</sub> & C2-H2 <sub>(-CH)</sub> ... O5 <sub>(SO4)</sub>                                                                                                                                                                                                                                                                                                                                                                                                                                                                                                                                                                                                                                                                                                                                                                                                                                                                                                                                                                                                                                                                                                                                                                                                                                                                                                                                                                                                  |
|               | $D_2^2(8)$  | *O1-H1 <sub>(-COOH)</sub> ... O8 <sub>(SO4)</sub> & N1-H3 <sub>(-NH3+)</sub> ... O6A <sub>(SO4)</sub><br>*C2-H2 <sub>(-CH)</sub> ... O5 <sub>(SO4)</sub> & C5-H10 <sub>(-CH2)</sub> ... O7 <sub>(SO4)</sub>                                                                                                                                                                                                                                                                                                                                                                                                                                                                                                                                                                                                                                                                                                                                                                                                                                                                                                                                                                                                                                                                                                                                                                                                                                                                                        |
|               | $D_2^2(9)$  | *N2-H13 <sub>(-NH3+)</sub> ... O3 <sub>(-NO3-)</sub> & C2-H2 <sub>(-CH)</sub> ... O5 <sub>(SO4)</sub><br>*N2-H14 <sub>(-NH3+)</sub> ... O4 <sub>(-NO3-)</sub> & C2-H2 <sub>(-CH)</sub> ... O5 <sub>(SO4)</sub>                                                                                                                                                                                                                                                                                                                                                                                                                                                                                                                                                                                                                                                                                                                                                                                                                                                                                                                                                                                                                                                                                                                                                                                                                                                                                     |
|               | $D_2^2(10)$ | *N1-H3 <sub>(-NH3+)</sub> ... O6A <sub>(SO4)</sub> & N2-H13 <sub>(-NH3+)</sub> ... O3 <sub>(-NO3-)</sub><br>*N1-H3 <sub>(-NH3+)</sub> ... O6A <sub>(SO4)</sub> & N2-H14 <sub>(-NH3+)</sub> ... O4 <sub>(-NO3-)</sub><br>*N1-H4 <sub>(-NH3+)</sub> ... O8A <sub>(SO4)</sub> & N2-H12 <sub>(-NH3+)</sub> ... O6A <sub>(SO4)</sub><br>*N1-H4 <sub>(-NH3+)</sub> ... O8A <sub>(SO4)</sub> & N2-H13 <sub>(-NH3+)</sub> ... O3 <sub>(-NO3-)</sub><br>*N1-H4 <sub>(-NH3+)</sub> ... O8A <sub>(SO4)</sub> & N2-H14 <sub>(-NH3+)</sub> ... O4 <sub>(-NO3-)</sub>                                                                                                                                                                                                                                                                                                                                                                                                                                                                                                                                                                                                                                                                                                                                                                                                                                                                                                                                            |
|               | $D_2^2(11)$ | *O1-H1 <sub>(-COOH)</sub> ... O8 <sub>(SO4)</sub> & N2-H12 <sub>(-NH3+)</sub> ... O6A <sub>(SO4)</sub><br>*O1-H1 <sub>(-COOH)</sub> ... O8 <sub>(SO4)</sub> & N2-H13 <sub>(-NH3+)</sub> ... O3 <sub>(-NO3-)</sub><br>*O1-H1 <sub>(-COOH)</sub> ... O8 <sub>(SO4)</sub> & N2-H14 <sub>(-NH3+)</sub> ... O4 <sub>(-NO3-)</sub><br>*O1-H1 <sub>(-COOH)</sub> ... O8 <sub>(SO4)</sub> & N2-H14 <sub>(-NH3+)</sub> ... O4 <sub>(-NO3-)</sub>                                                                                                                                                                                                                                                                                                                                                                                                                                                                                                                                                                                                                                                                                                                                                                                                                                                                                                                                                                                                                                                            |
|               | $D_3^2(7)$  | *N1-H4 <sub>(-NH3+)</sub> ... O8B <sub>(SO4)</sub> & (C2-H5 <sub>(-CH)</sub> ... O5 <sub>(SO4)</sub> ) <sub>2</sub><br>*N2-H12 <sub>(-NH3+)</sub> ... O6B <sub>(SO4)</sub> & (C5-H10 <sub>(-CH2)</sub> ... O7 <sub>(SO4)</sub> ) <sub>2</sub><br>*N2-H13 <sub>(-NH3+)</sub> ... O3A <sub>(-NO3-)</sub> & (C5-H10 <sub>(-CH2)</sub> ... O7 <sub>(SO4)</sub> ) <sub>2</sub><br>*N2-H14 <sub>(-NH3+)</sub> ... O4A <sub>(-NO3-)</sub> & (C5-H10 <sub>(-CH2)</sub> ... O7 <sub>(SO4)</sub> ) <sub>2</sub>                                                                                                                                                                                                                                                                                                                                                                                                                                                                                                                                                                                                                                                                                                                                                                                                                                                                                                                                                                                              |
|               | $D_3^2(8)$  | O1-H1 <sub>(-COOH)</sub> ... O8A <sub>(SO4)</sub> & (C2-H2 <sub>(-CH)</sub> ... O5 <sub>(SO4)</sub> ) <sub>2</sub>                                                                                                                                                                                                                                                                                                                                                                                                                                                                                                                                                                                                                                                                                                                                                                                                                                                                                                                                                                                                                                                                                                                                                                                                                                                                                                                                                                                 |
|               | $D_3^2(9)$  | *(C2-H2 <sub>(-CH)</sub> ... O5 <sub>(SO4)</sub> ) <sub>2</sub> & C5-H10 <sub>(-CH2)</sub> ... O7 <sub>(SO4)</sub><br>*N2-H13 <sub>(-NH3+)</sub> ... O3 <sub>(-NO3-)</sub> & N2-H13 <sub>(-NH3+)</sub> ... O3A <sub>(-NO3-)</sub> & C5-H10 <sub>(-CH2)</sub> ... O7 <sub>(SO4)</sub>                                                                                                                                                                                                                                                                                                                                                                                                                                                                                                                                                                                                                                                                                                                                                                                                                                                                                                                                                                                                                                                                                                                                                                                                               |
|               | $D_3^2(10)$ | *O1-H1 <sub>(-COOH)</sub> ... O8 <sub>(SO4)</sub> & O1-H1 <sub>(-COOH)</sub> ... O8A <sub>(SO4)</sub> & C2-H2 <sub>(-CH)</sub> ... O5 <sub>(SO4)</sub><br>*N2-H13 <sub>(-NH3+)</sub> ... O3A <sub>(-NO3-)</sub> & (C2-H2 <sub>(-CH)</sub> ... O5 <sub>(SO4)</sub> ) <sub>2</sub><br>*N2-H14 <sub>(-NH3+)</sub> ... O4A <sub>(-NO3-)</sub> & (C2-H2 <sub>(-CH)</sub> ... O5 <sub>(SO4)</sub> ) <sub>2</sub><br>*N1-H3 <sub>(-NH3+)</sub> ... O6B <sub>(SO4)</sub> & (C5-H10 <sub>(-CH2)</sub> ... O7 <sub>(SO4)</sub> ) <sub>2</sub>                                                                                                                                                                                                                                                                                                                                                                                                                                                                                                                                                                                                                                                                                                                                                                                                                                                                                                                                                                |
|               | $D_3^3(8)$  | *N1-H3 <sub>(-NH3+)</sub> ... O6A <sub>(SO4)</sub> & N4-H3 <sub>(-NO3-)</sub> ... O6 <sub>(SO4)</sub> & N1-H4 <sub>(-NH3+)</sub> ... O8 <sub>(SO4)</sub><br>*N1-H3 <sub>(-NH3+)</sub> ... O6 <sub>(SO4)</sub> & N1-H4 <sub>(-NH3+)</sub> ... O8 <sub>(SO4)</sub> & N1-H4 <sub>(-NH3+)</sub> ... O8A <sub>(SO4)</sub><br>*N2-H12 <sub>(-NH3+)</sub> ... O6A <sub>(SO4)</sub> & N2-H12 <sub>(-NH3+)</sub> ... O6 & N2-H13 <sub>(-NH3+)</sub> ... O3B <sub>(-NO3-)</sub><br>*N2-H13 <sub>(-NH3+)</sub> ... O3 <sub>(-NO3-)</sub> & N2-H13 <sub>(-NH3+)</sub> ... O3A <sub>(-NO3-)</sub> & N2-H12 <sub>(-NH3+)</sub> ... O6B <sub>(SO4)</sub><br>*N2-H12 <sub>(-NH3+)</sub> ... O6 <sub>(SO4)</sub> & N2-H12 <sub>(-NH3+)</sub> ... O6A <sub>(SO4)</sub> & N2-H14 <sub>(-NH3+)</sub> ... O4B <sub>(-NO3-)</sub><br>*N2-H14 <sub>(-NH3+)</sub> ... O4 <sub>(-NO3-)</sub> & N2-H14 <sub>(-NH3+)</sub> ... O4A <sub>(-NO3-)</sub> & N2-H12 <sub>(-NH3+)</sub> ... O6B <sub>(SO4)</sub><br>*N2-H13 <sub>(-NH3+)</sub> ... O3 <sub>(-NO3-)</sub> & N2-H13 <sub>(-NH3+)</sub> ... O3A <sub>(-NO3-)</sub> & N2-H14 <sub>(-NH3+)</sub> ... O4A <sub>(-NO3-)</sub><br>*N2-H14 <sub>(-NH3+)</sub> ... O4 <sub>(-NO3-)</sub> & N2-H14 <sub>(-NH3+)</sub> ... O4A <sub>(-NO3-)</sub> & N2-H13 <sub>(-NH3+)</sub> ... O3A <sub>(-NO3-)</sub>                                                                                                                                                                        |
|               | $D_3^3(9)$  | *N1-H4 <sub>(-NH3+)</sub> ... O8A <sub>(SO4)</sub> & N1-H4 <sub>(-NH3+)</sub> ... O8 <sub>(SO4)</sub> & C2-H2 <sub>(-CH)</sub> ... O5 <sub>(SO4)</sub><br>*N2-H12 <sub>(-NH3+)</sub> ... O6 <sub>(SO4)</sub> & N2-H12 <sub>(-NH3+)</sub> ... O6A <sub>(SO4)</sub> & (C5-H10 <sub>(-CH2)</sub> ... O7 <sub>(SO4)</sub> ) <sub>2</sub><br>*N2-H14 <sub>(-NH3+)</sub> ... O4 <sub>(-NO3-)</sub> & N2-H14 <sub>(-NH3+)</sub> ... O4A <sub>(-NO3-)</sub> & C5-H10 <sub>(-CH2)</sub> ... O7 <sub>(SO4)</sub>                                                                                                                                                                                                                                                                                                                                                                                                                                                                                                                                                                                                                                                                                                                                                                                                                                                                                                                                                                                             |
|               | $D_3^3(11)$ | *O1-H1 <sub>(-COOH)</sub> ... O8 <sub>(SO4)</sub> & O1-H1 <sub>(-COOH)</sub> ... O8A <sub>(SO4)</sub> & N1-H3 <sub>(-NH3+)</sub> ... O6B <sub>(SO4)</sub><br>*N1-H3 <sub>(-NH3+)</sub> ... O6 <sub>(SO4)</sub> & N1-H3 <sub>(-NH3+)</sub> ... O6 <sub>(SO4)</sub> & O1-H1 <sub>(-COOH)</sub> ... O8B <sub>(SO4)</sub>                                                                                                                                                                                                                                                                                                                                                                                                                                                                                                                                                                                                                                                                                                                                                                                                                                                                                                                                                                                                                                                                                                                                                                              |
|               | $D_3^3(12)$ | *N2-H13 <sub>(-NH3+)</sub> ... O3 <sub>(-NO3-)</sub> & N2-H13A <sub>(-NH3+)</sub> ... O3A <sub>(-NO3-)</sub> & C2-H2 <sub>(-CH)</sub> ... O5 <sub>(SO4)</sub><br>*N2-H14 <sub>(-NH3+)</sub> ... O4 <sub>(-NO3-)</sub> & N2-H14 <sub>(-NH3+)</sub> ... O4A <sub>(-NO3-)</sub> & (C2-H2 <sub>(-CH)</sub> ... O5 <sub>(SO4)</sub> ) <sub>2</sub><br>*N1-H3 <sub>(-NH3+)</sub> ... O6 <sub>(SO4)</sub> & N1-H3 <sub>(-NH3+)</sub> ... O6A <sub>(SO4)</sub> & C5-H10 <sub>(-CH2)</sub> ... O7 <sub>(SO4)</sub>                                                                                                                                                                                                                                                                                                                                                                                                                                                                                                                                                                                                                                                                                                                                                                                                                                                                                                                                                                                          |
|               | $D_3^3(13)$ | *N1-H3 <sub>(-NH3+)</sub> ... O6 <sub>(SO4)</sub> & N1-H3 <sub>(-NH3+)</sub> ... O6A <sub>(SO4)</sub> & N2-H13 <sub>(-NH3+)</sub> ... O3B <sub>(-NO3-)</sub><br>*N1-H3 <sub>(-NH3+)</sub> ... O6B <sub>(SO4)</sub> & N2-H13 <sub>(-NH3+)</sub> ... O3 <sub>(-NO3-)</sub> & N2-H13 <sub>(-NH3+)</sub> ... O3A <sub>(-NO3-)</sub><br>*N1-H3 <sub>(-NH3+)</sub> ... O6 <sub>(SO4)</sub> & N1-H3 <sub>(-NH3+)</sub> ... O6A <sub>(SO4)</sub> & N2-H14 <sub>(-NH3+)</sub> ... O4B <sub>(-NO3-)</sub><br>*N1-H3 <sub>(-NH3+)</sub> ... O6B <sub>(SO4)</sub> & N2-H14 <sub>(-NH3+)</sub> ... O4A <sub>(-NO3-)</sub> & N2-H14 <sub>(-NH3+)</sub> ... O4 <sub>(-NO3-)</sub><br>*N1-H4 <sub>(-NH3+)</sub> ... O8 <sub>(SO4)</sub> & N1-H4 <sub>(-NH3+)</sub> ... O8A <sub>(SO4)</sub> & N2-H12 <sub>(-NH3+)</sub> ... O6 <sub>(SO4)</sub><br>*N1-H4 <sub>(-NH3+)</sub> ... O8 <sub>(SO4)</sub> & N2-H12 <sub>(-NH3+)</sub> ... O6 <sub>(SO4)</sub> & N2-H12 <sub>(-NH3+)</sub> ... O6A <sub>(SO4)</sub><br>*N1-H4 <sub>(-NH3+)</sub> ... O8B <sub>(SO4)</sub> & N2-H13 <sub>(-NH3+)</sub> ... O3A <sub>(-NO3-)</sub> & N2-H13 <sub>(-NH3+)</sub> ... O3 <sub>(-NO3-)</sub><br>*N1-H4 <sub>(-NH3+)</sub> ... O8A <sub>(SO4)</sub> & N2-H14 <sub>(-NH3+)</sub> ... O4B <sub>(-NO3-)</sub> & N1-H4 <sub>(-NH3+)</sub> ... O8 <sub>(SO4)</sub><br>*N1-H4 <sub>(-NH3+)</sub> ... O8B <sub>(SO4)</sub> & N2-H14 <sub>(-NH3+)</sub> ... O4A <sub>(-NO3-)</sub> & N2-H4 <sub>(-NH3+)</sub> ... O4 <sub>(-NO3-)</sub> |
|               | $D_3^3(14)$ | *O1-H1 <sub>(-COOH)</sub> ... O8 <sub>(SO4)</sub> & O1-H1 <sub>(-COOH)</sub> ... O8A <sub>(SO4)</sub> & N2-H12 <sub>(-NH3+)</sub> ... O6B <sub>(SO4)</sub><br>*O1-H1 <sub>(-COOH)</sub> ... O8 <sub>(SO4)</sub> & O1-H1 <sub>(-COOH)</sub> ... O8A <sub>(SO4)</sub> & N2-H13 <sub>(-NH3+)</sub> ... O3A <sub>(-NO3-)</sub><br>*O1-H1 <sub>(-COOH)</sub> ... O8B <sub>(SO4)</sub> & N2-H12 <sub>(-NH3+)</sub> ... O6A <sub>(SO4)</sub> & N2-H12 <sub>(-NH3+)</sub> ... O6 <sub>(SO4)</sub><br>*O1-H1 <sub>(-COOH)</sub> ... O8 <sub>(SO4)</sub> & O1-H1 <sub>(-COOH)</sub> ... O8A <sub>(SO4)</sub> & N2-H13 <sub>(-NH3+)</sub> ... O3A <sub>(-NO3-)</sub><br>*O1-H1 <sub>(-COOH)</sub> ... O8A <sub>(SO4)</sub> & N2-H13 <sub>(-NH3+)</sub> ... O3 <sub>(-NO3-)</sub> & N2-H13 <sub>(-NH3+)</sub> ... O3A <sub>(-NO3-)</sub><br>*O1-H1 <sub>(-COOH)</sub> ... O8 <sub>(SO4)</sub> & O1-H1 <sub>(-COOH)</sub> ... O8A <sub>(SO4)</sub> & N2-H14 <sub>(-NH3+)</sub> ... O4A <sub>(-NO3-)</sub><br>*O1-H1 <sub>(-COOH)</sub> ... O4 <sub>(-NO3-)</sub> & N2-H14 <sub>(-NH3+)</sub> ... O4 <sub>(-NO3-)</sub> & N2-H14 <sub>(-NH3+)</sub> ... O4A <sub>(-NO3-)</sub>                                                                                                                                                                                                                                                                                                                                   |
| <b>BAPKOV</b> | C(4)        | C2-H8 <sub>(-CH)</sub> ... O2 <sub>(-COOH)</sub> ornithine                                                                                                                                                                                                                                                                                                                                                                                                                                                                                                                                                                                                                                                                                                                                                                                                                                                                                                                                                                                                                                                                                                                                                                                                                                                                                                                                                                                                                                         |
|               | C(8)        | N2-H6 <sub>(-NH3+)</sub> ... O2 <sub>(-COOH)</sub> ornithine                                                                                                                                                                                                                                                                                                                                                                                                                                                                                                                                                                                                                                                                                                                                                                                                                                                                                                                                                                                                                                                                                                                                                                                                                                                                                                                                                                                                                                       |
|               | $R_2^2(12)$ | (C4-H12 <sub>(-CH2)</sub> ... O1 <sub>(-COOH)</sub> ) <sub>2</sub> ornithine                                                                                                                                                                                                                                                                                                                                                                                                                                                                                                                                                                                                                                                                                                                                                                                                                                                                                                                                                                                                                                                                                                                                                                                                                                                                                                                                                                                                                       |
|               | D(2)        | *O1-H1 <sub>(-COOH)</sub> ... O4A <sub>(-SO4)</sub><br>*N1-H2 <sub>(-NH3+)</sub> ... Cl1                                                                                                                                                                                                                                                                                                                                                                                                                                                                                                                                                                                                                                                                                                                                                                                                                                                                                                                                                                                                                                                                                                                                                                                                                                                                                                                                                                                                           |

|         |             |                                                                                                                                                                                                                                                                                                                                                                                                                                                                                                                                                                                                                                                                                                                                                                                                                                                                                                                                                                                       |
|---------|-------------|---------------------------------------------------------------------------------------------------------------------------------------------------------------------------------------------------------------------------------------------------------------------------------------------------------------------------------------------------------------------------------------------------------------------------------------------------------------------------------------------------------------------------------------------------------------------------------------------------------------------------------------------------------------------------------------------------------------------------------------------------------------------------------------------------------------------------------------------------------------------------------------------------------------------------------------------------------------------------------------|
|         |             | <p>*N1-H3<sub>(-NH3+)</sub> ...O3<sub>(-SO4)</sub><br/> *N1-H4<sub>(-NH3+)</sub> ...Cl2<br/> *N2-H5<sub>(-NH3+)</sub> ...O3<sub>(-SO4)</sub><br/> *N2-H5<sub>(-NH3+)</sub> ...O4A<sub>(-SO4)</sub><br/> *N2-H6<sub>(-NH3+)</sub> ...Cl1<br/> *N2-H7<sub>(-NH3+)</sub> ...Cl2<br/> *C3-H10<sub>(-CH2)</sub> ...O3A<sub>(-SO4)</sub></p>                                                                                                                                                                                                                                                                                                                                                                                                                                                                                                                                                                                                                                                |
|         | $D^1_2(3)$  | <p>*(N1-H2<sub>(-NH3+)</sub> ...Cl1)<sub>2</sub><br/> *(N1-H4<sub>(-NH3+)</sub> ...Cl2)<sub>2</sub><br/> *(N2-H6<sub>(-NH3+)</sub> ...Cl1)<sub>2</sub><br/> *(N2-H7<sub>(-NH3+)</sub> ...Cl2)<sub>2</sub></p>                                                                                                                                                                                                                                                                                                                                                                                                                                                                                                                                                                                                                                                                                                                                                                         |
|         | $D^2_2(5)$  | <p>*O1-H1<sub>(-COOH)</sub> ...O4A<sub>(-SO4)</sub> &amp; O1-H1<sub>(-COOH)</sub> ...O4<sub>(-SO4)</sub><br/> *N1-H3<sub>(-NH3+)</sub> ...O3<sub>(-SO4)</sub> &amp; N1-H3<sub>(-NH3+)</sub> ...O3A<sub>(-SO4)</sub><br/> *N2-H5<sub>(-NH3+)</sub> ...O3<sub>(-SO4)</sub> &amp; N2-H5<sub>(-NH3+)</sub> ...O3A<sub>(-SO4)</sub><br/> *N2-H5<sub>(-NH3+)</sub> ...O4A<sub>(-SO4)</sub> &amp; N2-H5<sub>(-NH3+)</sub> ...O4<sub>(-SO4)</sub><br/> *C3-H10<sub>(-CH2)</sub> ...O3A<sub>(-SO4)</sub> &amp; C3-H10<sub>(-CH2)</sub> ...O3<sub>(-SO4)</sub></p>                                                                                                                                                                                                                                                                                                                                                                                                                              |
| level 2 | $C^1_2(9)$  | <p>*N1-H2<sub>(-NH3+)</sub> ...Cl1 &amp; N2-H6<sub>(-NH3+)</sub> ...Cl1<br/> *N1-H3<sub>(-NH3+)</sub> ...O3<sub>(-SO4)</sub> &amp; N2-H5<sub>(-NH3+)</sub> ...O3<sub>(-SO4)</sub><br/> *N1-H4<sub>(-NH3+)</sub> ...Cl2 &amp; N2-H7<sub>(-NH3+)</sub> ...Cl2</p>                                                                                                                                                                                                                                                                                                                                                                                                                                                                                                                                                                                                                                                                                                                       |
|         | $C^1_2(10)$ | O1-H1 <sub>(-COOH)</sub> ...O4A <sub>(-SO4)</sub> & N2-H5 <sub>(-NH3+)</sub> ...O4A <sub>(-SO4)</sub>                                                                                                                                                                                                                                                                                                                                                                                                                                                                                                                                                                                                                                                                                                                                                                                                                                                                                 |
|         | $C^2_2(9)$  | <p>*O1-H1<sub>(-COOH)</sub> ...O4A<sub>(-SO4)</sub> &amp; N1-H3<sub>(-NH3+)</sub> ...O3<sub>(-SO4)</sub><br/> *O1-H1<sub>(-COOH)</sub> ...O4<sub>(-SO4)</sub> &amp; O1-H1<sub>(-COOH)</sub> ...O4A<sub>(-SO4)</sub> &amp; C3-H10<sub>(-CH2)</sub> ...O3<sub>(-SO4)</sub></p>                                                                                                                                                                                                                                                                                                                                                                                                                                                                                                                                                                                                                                                                                                          |
|         | $C^2_2(10)$ | N2-H6 <sub>(-NH3+)</sub> ...O2 <sub>(-COOH)</sub> <b>ornithine</b> & (N2-H6 <sub>(-NH3+)</sub> ...Cl1) <sub>2</sub>                                                                                                                                                                                                                                                                                                                                                                                                                                                                                                                                                                                                                                                                                                                                                                                                                                                                   |
|         | $C^2_2(11)$ | N1-H3 <sub>(-NH3+)</sub> ...O3 <sub>(-SO4)</sub> & N2-H5 <sub>(-NH3+)</sub> ...O4A <sub>(-SO4)</sub>                                                                                                                                                                                                                                                                                                                                                                                                                                                                                                                                                                                                                                                                                                                                                                                                                                                                                  |
|         | $C^2_2(12)$ | <p>*O1-H1<sub>(-COOH)</sub> ...O4A<sub>(-SO4)</sub> &amp; N2-H5<sub>(-NH3+)</sub> ...O3<sub>(-SO4)</sub><br/> *O1-H1<sub>(-COOH)</sub> ...O4A<sub>(-SO4)</sub> &amp; N2-H5<sub>(-NH3+)</sub> ...O4<sub>(-SO4)</sub></p>                                                                                                                                                                                                                                                                                                                                                                                                                                                                                                                                                                                                                                                                                                                                                               |
|         | $C^2_3(12)$ | N2-H6 <sub>(-NH3+)</sub> ...O2 <sub>(-COOH)</sub> <b>ornithine</b> & (N2-H7 <sub>(-NH3+)</sub> ...Cl2) <sub>2</sub>                                                                                                                                                                                                                                                                                                                                                                                                                                                                                                                                                                                                                                                                                                                                                                                                                                                                   |
|         | $C^2_3(14)$ | <p>*N2-H6<sub>(-NH3+)</sub> ...O2<sub>(-COOH)</sub> <b>ornithine</b> &amp; (N1-H2<sub>(-NH3+)</sub> ...Cl1)<sub>2</sub><br/> *(N1-H4<sub>(-NH3+)</sub> ...Cl2)<sub>2</sub> &amp; N2-H6<sub>(-NH3+)</sub> ...O2<sub>(-COOH)</sub> <b>ornithine</b></p>                                                                                                                                                                                                                                                                                                                                                                                                                                                                                                                                                                                                                                                                                                                                 |
|         | $C^2_4(18)$ | <p>*(N2-H6<sub>(-NH3+)</sub> ...Cl1)<sub>2</sub> &amp; (N1-H2<sub>(-NH3+)</sub> ...Cl1)<sub>2</sub><br/> *(N1-H2<sub>(-NH3+)</sub> ...Cl1)<sub>2</sub> &amp; (N2-H7<sub>(-NH3+)</sub> ...Cl2)<sub>2</sub><br/> *(N1-H4<sub>(-NH3+)</sub> ...Cl2) &amp; (N2-H6<sub>(-NH3+)</sub> ...Cl1)<sub>2</sub><br/> *(N1-H4<sub>(-NH3+)</sub> ...Cl2)<sub>2</sub> &amp; (N2-H7<sub>(-NH3+)</sub> ...Cl2)<sub>2</sub></p>                                                                                                                                                                                                                                                                                                                                                                                                                                                                                                                                                                         |
|         | $C^3_3(12)$ | O1-H1 <sub>(-COOH)</sub> ...O4 <sub>(-SO4)</sub> & O1-H1 <sub>(-COOH)</sub> ...O4A <sub>(-SO4)</sub> & C2-H8 <sub>(-CH)</sub> ...O2 <sub>(-COOH)</sub> <b>ornithine</b>                                                                                                                                                                                                                                                                                                                                                                                                                                                                                                                                                                                                                                                                                                                                                                                                               |
|         | $C^3_3(14)$ | <p>*N2-H5<sub>(-NH3+)</sub> ...O3<sub>(-SO4)</sub> &amp; N2-H5<sub>(-NH3+)</sub> ...O3A<sub>(-SO4)</sub> &amp; N2-H6<sub>(-NH3+)</sub> ...O2<sub>(-COOH)</sub><b>ornithine</b><br/> *N2-H5<sub>(-NH3+)</sub> ...O4A<sub>(-SO4)</sub> &amp; N2-H5<sub>(-NH3+)</sub> ...O4<sub>(-SO4)</sub> &amp; N2-H6<sub>(-NH3+)</sub> ...O2<sub>(-COOH)</sub><b>ornithine</b></p>                                                                                                                                                                                                                                                                                                                                                                                                                                                                                                                                                                                                                   |
|         | $C^3_3(16)$ | <p>*O1-H1<sub>(-COOH)</sub> ...O4<sub>(-SO4)</sub> &amp; O1-H1<sub>(-COOH)</sub> ...O4A<sub>(-SO4)</sub> &amp; N2-H6<sub>(-NH3+)</sub> ...O2<sub>(-COOH)</sub><b>ornithine</b><br/> *N1-H3<sub>(-NH3+)</sub> ...O3<sub>(-SO4)</sub> &amp; N2-H6<sub>(-NH3+)</sub> ...O2<sub>(-COOH)</sub> <b>ornithine</b></p>                                                                                                                                                                                                                                                                                                                                                                                                                                                                                                                                                                                                                                                                        |
|         | $C^3_4(10)$ | <p>*(N1-H2<sub>(-NH3+)</sub> ...Cl1)<sub>2</sub> &amp; N1-H3<sub>(-NH3+)</sub> ...O3<sub>(-SO4)</sub> &amp; N1-H3<sub>(-NH3+)</sub> ...O3A<sub>(-SO4)</sub><br/> *(N1-H4<sub>(-NH3+)</sub> ...Cl2)<sub>2</sub> &amp; N1-H3<sub>(-NH3+)</sub> ...O3<sub>(-SO4)</sub> &amp; N1-H3<sub>(-NH3+)</sub> ...O3A<sub>(-SO4)</sub><br/> *N2-H5<sub>(-NH3+)</sub> ...O3<sub>(-SO4)</sub> &amp; N2-H5<sub>(-NH3+)</sub> ...O3A<sub>(-SO4)</sub> &amp; (N2-H6<sub>(-NH3+)</sub> ...Cl1)<sub>2</sub><br/> *N2-H5<sub>(-NH3+)</sub> ...O3<sub>(-SO4)</sub> &amp; N2-H5<sub>(-NH3+)</sub> ...O3A<sub>(-SO4)</sub> &amp; (N2-H7<sub>(-NH3+)</sub> ...Cl2)<sub>2</sub><br/> *N2-H5<sub>(-NH3+)</sub> ...O4<sub>(-SO4)</sub> &amp; N2-H5<sub>(-NH3+)</sub> ...O4A<sub>(-SO4)</sub> &amp; (N2-H6<sub>(-NH3+)</sub> ...Cl1)<sub>2</sub><br/> *N2-H5<sub>(-NH3+)</sub> ...O4<sub>(-SO4)</sub> &amp; N2-H5<sub>(-NH3+)</sub> ...O4A<sub>(-SO4)</sub> &amp; (N2-H7<sub>(-NH3+)</sub> ...Cl2)<sub>2</sub></p> |
|         | $C^3_4(16)$ | <p>*O1-H1<sub>(-COOH)</sub> ...O4<sub>(-SO4)</sub> &amp; O1-H1<sub>(-COOH)</sub> ...O4A<sub>(-SO4)</sub> &amp; (N1-H2<sub>(-NH3+)</sub> ...Cl1)<sub>2</sub><br/> *O1-H1<sub>(-COOH)</sub> ...O4<sub>(-SO4)</sub> &amp; O1-H1<sub>(-COOH)</sub> ...O4A<sub>(-SO4)</sub> &amp; (N1-H4<sub>(-NH3+)</sub> ...Cl2)<sub>2</sub></p>                                                                                                                                                                                                                                                                                                                                                                                                                                                                                                                                                                                                                                                         |
|         | $C^3_4(20)$ | <p>*N1-H2<sub>(-NH3+)</sub> ...Cl1 &amp; N2-H5<sub>(-NH3+)</sub> ...O3<sub>(-SO4)</sub> &amp; N2-H5<sub>(-NH3+)</sub> ...O3A<sub>(-SO4)</sub><br/> *N2-H5<sub>(-NH3+)</sub> ...O4<sub>(-SO4)</sub> &amp; (N1-H2<sub>(-NH3+)</sub> ...Cl1)<sub>2</sub> &amp; N2-H5<sub>(-NH3+)</sub> ...O4A<sub>(-SO4)</sub><br/> *N1-H3<sub>(-NH3+)</sub> ...O3<sub>(-SO4)</sub> &amp; N1-H3<sub>(-NH3+)</sub> ...O3A<sub>(-SO4)</sub> &amp; N2-H6<sub>(-NH3+)</sub> ...Cl1<br/> *N1-H3<sub>(-NH3+)</sub> ...O3<sub>(-SO4)</sub> &amp; N1-H3<sub>(-NH3+)</sub> ...O3A<sub>(-SO4)</sub> &amp; (N2-H7<sub>(-NH3+)</sub> ...Cl2)<sub>2</sub><br/> *(N1-H4<sub>(-NH3+)</sub> ...Cl2)<sub>2</sub> &amp; N2-H5<sub>(-NH3+)</sub> ...O4<sub>(-SO4)</sub> &amp; N2-H5<sub>(-NH3+)</sub> ...O4A<sub>(-SO4)</sub></p>                                                                                                                                                                                           |
|         | $C^4_4(18)$ | O1-H1 <sub>(-COOH)</sub> ...O4 <sub>(-SO4)</sub> & O1-H1 ...O4A <sub>(-SO4)</sub> & (N1-H3 <sub>(-NH3+)</sub> ...O3 <sub>(-SO4)</sub> ) <sub>2</sub>                                                                                                                                                                                                                                                                                                                                                                                                                                                                                                                                                                                                                                                                                                                                                                                                                                  |
|         | $R^2_1(4)$  | N2-H5 <sub>(-NH3+)</sub> ...O3 <sub>(-SO4)</sub> & N2-H5 <sub>(-NH3+)</sub> ...O4A <sub>(-SO4)</sub>                                                                                                                                                                                                                                                                                                                                                                                                                                                                                                                                                                                                                                                                                                                                                                                                                                                                                  |
|         | $R^2_4(8)$  | <p>*N1-H2<sub>(-NH3+)</sub> ...Cl1 &amp; (N1-H4<sub>(-NH3+)</sub> ...Cl2)<sub>2</sub><br/> *(N2-H6<sub>(-NH3+)</sub> ...Cl1)<sub>2</sub> &amp; (N2-H7<sub>(-NH3+)</sub> ...Cl2)<sub>2</sub></p>                                                                                                                                                                                                                                                                                                                                                                                                                                                                                                                                                                                                                                                                                                                                                                                       |
|         | $R^3_3(12)$ | O1-H1 <sub>(-COOH)</sub> ...O4 <sub>(-SO4)</sub> & O1-H1 <sub>(-COOH)</sub> ...O4A <sub>(-SO4)</sub> & C4-H12 <sub>(-CH2)</sub> ...O1 <sub>(-COOH)</sub> <b>ornithine</b>                                                                                                                                                                                                                                                                                                                                                                                                                                                                                                                                                                                                                                                                                                                                                                                                             |
|         | $R^4_4(18)$ | O1-H1 <sub>(-COOH)</sub> ...O4 <sub>(-SO4)</sub> & O1-H1 <sub>(-COOH)</sub> ...O4A <sub>(-SO4)</sub> & C3-H10 <sub>(-CH2)</sub> ...O3 <sub>(-SO4)</sub> & C3-H10 <sub>(-CH2)</sub> ...O3A <sub>(-SO4)</sub>                                                                                                                                                                                                                                                                                                                                                                                                                                                                                                                                                                                                                                                                                                                                                                           |
|         | $D^2_2(5)$  | <p>*N1-H2<sub>(-NH3+)</sub> ...Cl1 &amp; N1-H3<sub>(-NH3+)</sub> ...O3<sub>(-SO4)</sub><br/> *(N1-H2<sub>(-NH3+)</sub> ...Cl1)<sub>2</sub> &amp; N1-H4<sub>(-NH3+)</sub> ...Cl2<br/> *N1-H3<sub>(-NH3+)</sub> ...O3<sub>(-SO4)</sub> &amp; N2-H7<sub>(-NH3+)</sub> ...Cl2<br/> *N2-H6<sub>(-NH3+)</sub> ...Cl1 &amp; N2-H5<sub>(-NH3+)</sub> ...O3<sub>(-SO4)</sub><br/> *N2-H7<sub>(-NH3+)</sub> ...Cl2 &amp; N2-H5<sub>(-NH3+)</sub> ...O3<sub>(-SO4)</sub><br/> *N2-H6<sub>(-NH3+)</sub> ...Cl1 &amp; N2-H5<sub>(-NH3+)</sub> ...O4A<sub>(-SO4)</sub><br/> *N2-H7<sub>(-NH3+)</sub> ...Cl2 &amp; N2-H5<sub>(-NH3+)</sub> ...O4A<sub>(-SO4)</sub><br/> *N2-H6<sub>(-NH3+)</sub> ...Cl1 &amp; (N2-H7<sub>(-NH3+)</sub> ...Cl2)<sub>2</sub></p>                                                                                                                                                                                                                                       |



|               |             |                                                                                                                                                                                                                                                                                                                                                                                                                                                                                                                                                                                                                                                                                                                                                                                                                                                                                                                   |
|---------------|-------------|-------------------------------------------------------------------------------------------------------------------------------------------------------------------------------------------------------------------------------------------------------------------------------------------------------------------------------------------------------------------------------------------------------------------------------------------------------------------------------------------------------------------------------------------------------------------------------------------------------------------------------------------------------------------------------------------------------------------------------------------------------------------------------------------------------------------------------------------------------------------------------------------------------------------|
|               | $D_2^2(8)$  | *O1-H1 <sub>(-COOH)</sub> ...O4A <sub>(-SO4)</sub> & N1-H2 <sub>(-NH3+)</sub> ...C11<br>*O1-H1 <sub>(-COOH)</sub> ...O4A <sub>(-SO4)</sub> & N1-H4 <sub>(-NH3+)</sub> ...C12                                                                                                                                                                                                                                                                                                                                                                                                                                                                                                                                                                                                                                                                                                                                      |
|               | $D_2^2(10)$ | *N2-H5 <sub>(-NH3+)</sub> ...O3 <sub>(-SO4)</sub> & N1-H2 <sub>(-NH3+)</sub> ...C11<br>*N1-H2 <sub>(-NH3+)</sub> ...C11 & N2-H5 <sub>(-NH3+)</sub> ...O4A <sub>(-SO4)</sub><br>*N1-H2 <sub>(-NH3+)</sub> ...C11 & N2-H7 <sub>(-NH3+)</sub> ...C12<br>*N1-H3 <sub>(-NH3+)</sub> ...O3 <sub>(-SO4)</sub> & N2-H6 <sub>(-NH3+)</sub> ...C11<br>*N1-H3 <sub>(-NH3+)</sub> ...O3 <sub>(-SO4)</sub> & N2-H7 <sub>(-NH3+)</sub> ...C12<br>*N1-H4 <sub>(-NH3+)</sub> ...C12 & N2-H5 <sub>(-NH3+)</sub> ...O4A <sub>(-SO4)</sub><br>*N1-H4 <sub>(-NH3+)</sub> ...C12 & N2-H6 <sub>(-NH3+)</sub> ...C11                                                                                                                                                                                                                                                                                                                     |
|               | $D_2^2(11)$ | *O1-H1 <sub>(-COOH)</sub> ...O4A <sub>(-SO4)</sub> & N2-H6 <sub>(-NH3+)</sub> ...C11<br>*O1-H1 <sub>(-COOH)</sub> ...O4A <sub>(-SO4)</sub> & N2-H7 <sub>(-NH3+)</sub> ...C12                                                                                                                                                                                                                                                                                                                                                                                                                                                                                                                                                                                                                                                                                                                                      |
|               | $D_3^2(6)$  | *(N1-H2 <sub>(-NH3+)</sub> ...C11) <sub>2</sub> & N1-H3 <sub>(-NH3+)</sub> ...O3 <sub>(-SO4)</sub><br>*(N1-H2 <sub>(-NH3+)</sub> ...C11) <sub>2</sub> & N1-H4 <sub>(-NH3+)</sub> ...C12<br>*N1-H2 <sub>(-NH3+)</sub> ...C11 & (N1-H4 <sub>(-NH3+)</sub> ...C12) <sub>2</sub><br>*N1-H3 <sub>(-NH3+)</sub> ...O3A <sub>(-SO4)</sub> & (N1-H4 <sub>(-NH3+)</sub> ...C12) <sub>2</sub><br>*N2-H5 <sub>(-NH3+)</sub> ...O3A <sub>(-SO4)</sub> & (N2-H6 <sub>(-NH3+)</sub> ...C11) <sub>2</sub><br>*N2-H5 <sub>(-NH3+)</sub> ...O3A <sub>(-SO4)</sub> & (N2-H7 <sub>(-NH3+)</sub> ...C12) <sub>2</sub><br>*N2-H5 <sub>(-NH3+)</sub> ...O4 <sub>(-SO4)</sub> & (N2-H6 <sub>(-NH3+)</sub> ...C11) <sub>2</sub><br>*N2-H5 <sub>(-NH3+)</sub> ...O4 <sub>(-SO4)</sub> & (N2-H7 <sub>(-NH3+)</sub> ...C12) <sub>2</sub><br>*(N2-H6 <sub>(-NH3+)</sub> ...C11) <sub>2</sub> & (N2-H7 <sub>(-NH3+)</sub> ...C12) <sub>2</sub> |
|               | $D_3^2(8)$  | *N2-H5 <sub>(-NH3+)</sub> ...O3 <sub>(-SO4)</sub> & N2-H5 <sub>(-NH3+)</sub> ...O3A <sub>(-SO4)</sub> & (N2-H6 <sub>(-NH3+)</sub> ...C11) <sub>2</sub><br>*N2-H5 <sub>(-NH3+)</sub> ...O3 <sub>(-SO4)</sub> & N2-H5 <sub>(-NH3+)</sub> ...O3A <sub>(-SO4)</sub> & N2-H7 <sub>(-NH3+)</sub> ...C12                                                                                                                                                                                                                                                                                                                                                                                                                                                                                                                                                                                                                 |
|               | $D_3^2(9)$  | *(N1-H2 <sub>(-NH3+)</sub> ...C11) <sub>2</sub><br>*O1-H1 <sub>(-COOH)</sub> ...O4 <sub>(-SO4)</sub> & N1-H4 <sub>(-NH3+)</sub> ...C12                                                                                                                                                                                                                                                                                                                                                                                                                                                                                                                                                                                                                                                                                                                                                                            |
|               | $D_3^2(11)$ | *(N1-H2 <sub>(-NH3+)</sub> ...C11) <sub>2</sub> & N2-H5 <sub>(-NH3+)</sub> ...O3A <sub>(-SO4)</sub><br>*(N1-H2 <sub>(-NH3+)</sub> ...C11) <sub>2</sub> & N2-H5 <sub>(-NH3+)</sub> ...O4 <sub>(-SO4)</sub><br>*N2-H7 <sub>(-NH3+)</sub> ...C12 & (N1-H2 <sub>(-NH3+)</sub> ...C11) <sub>2</sub><br>*N1-H3 <sub>(-NH3+)</sub> ...O3A <sub>(-SO4)</sub> & (N2-H6 <sub>(-NH3+)</sub> ...C11) <sub>2</sub><br>*N1-H3 <sub>(-NH3+)</sub> ...O3A <sub>(-SO4)</sub> & (N2-H7 <sub>(-NH3+)</sub> ...C12) <sub>2</sub><br>*(N1-H4 <sub>(-NH3+)</sub> ...C12) <sub>2</sub> & N2-H5 <sub>(-NH3+)</sub> ...O4 <sub>(-SO4)</sub><br>*(N1-H4 <sub>(-NH3+)</sub> ...C12) <sub>2</sub> & N2-H6 <sub>(-NH3+)</sub> ...C11                                                                                                                                                                                                           |
|               | $D_3^2(12)$ | *(N2-H6 <sub>(-NH3+)</sub> ...C11) <sub>2</sub><br>*(N2-H7 <sub>(-NH3+)</sub> ...C12) <sub>2</sub>                                                                                                                                                                                                                                                                                                                                                                                                                                                                                                                                                                                                                                                                                                                                                                                                                |
|               | $D_3^3(8)$  | *N1-H2 <sub>(-NH3+)</sub> ...C11 & N1-H3 <sub>(-NH3+)</sub> ...O3 <sub>(-SO4)</sub> & N1-H3 <sub>(-NH3+)</sub> ...O3A <sub>(-SO4)</sub><br>*N1-H3 <sub>(-NH3+)</sub> ...O3 <sub>(-SO4)</sub> & N1-H3 <sub>(-NH3+)</sub> ...O3A <sub>(-SO4)</sub> & N1-H4 <sub>(-NH3+)</sub> ...C12<br>*N2-H5 <sub>(-NH3+)</sub> ...O4A <sub>(-SO4)</sub> & N2-H5 <sub>(-NH3+)</sub> ...O4 <sub>(-SO4)</sub> & N2-H6 <sub>(-NH3+)</sub> ...C11<br>*N2-H5 <sub>(-NH3+)</sub> ...O4 <sub>(-SO4)</sub> & N2-H5 <sub>(-NH3+)</sub> ...O4A <sub>(-SO4)</sub> & N2-H7 <sub>(-NH3+)</sub> ...C12                                                                                                                                                                                                                                                                                                                                          |
|               | $D_3^3(11)$ | *O1-H1 <sub>(-COOH)</sub> ...O4A <sub>(-SO4)</sub> & O1-H1 <sub>(-COOH)</sub> ...O4 <sub>(-SO4)</sub> & N1-H2 <sub>(-NH3+)</sub> ...C11<br>*O1-H1 <sub>(-COOH)</sub> ...O4 <sub>(-SO4)</sub> & O1-H1 <sub>(-COOH)</sub> ...O4A <sub>(-SO4)</sub> & N1-H4 <sub>(-NH3+)</sub> ...C12                                                                                                                                                                                                                                                                                                                                                                                                                                                                                                                                                                                                                                |
|               | $D_3^3(13)$ | *N1-H2 <sub>(-NH3+)</sub> ...C11 & N2-H5 <sub>(-NH3+)</sub> ...O3 <sub>(-SO4)</sub> & N2-H5 <sub>(-NH3+)</sub> ...O3A <sub>(-SO4)</sub><br>*N1-H2 <sub>(-NH3+)</sub> ...C11 & N2-H5 <sub>(-NH3+)</sub> ...O4 <sub>(-SO4)</sub> & N2-H5 <sub>(-NH3+)</sub> ...O4A <sub>(-SO4)</sub><br>*N1-H3 <sub>(-NH3+)</sub> ...O3 <sub>(-SO4)</sub> & N1-H3 <sub>(-NH3+)</sub> ...O3A <sub>(-SO4)</sub> & N2-H6 <sub>(-NH3+)</sub> ...C11<br>*N1-H3 <sub>(-NH3+)</sub> ...O3 <sub>(-SO4)</sub> & N1-H3 <sub>(-NH3+)</sub> ...O3A <sub>(-SO4)</sub> & N2-H7 <sub>(-NH3+)</sub> ...C12<br>*N2-H5 <sub>(-NH3+)</sub> ...O4 <sub>(-SO4)</sub> & N1-H4 <sub>(-NH3+)</sub> ...C12 & N2-H5 <sub>(-NH3+)</sub> ...O4A <sub>(-SO4)</sub>                                                                                                                                                                                               |
|               | $D_3^3(14)$ | *O1-H1 <sub>(-COOH)</sub> ...O4 <sub>(-SO4)</sub> & O1-H1 <sub>(-COOH)</sub> ...O4A <sub>(-SO4)</sub> & N1-H6 <sub>(-NH3+)</sub> ...C11<br>*O1-H1 <sub>(-COOH)</sub> ...O4 <sub>(-SO4)</sub> & O1-H1 <sub>(-COOH)</sub> ...O4A <sub>(-SO4)</sub> & (N2-H7 <sub>(-NH3+)</sub> ...C12) <sub>2</sub>                                                                                                                                                                                                                                                                                                                                                                                                                                                                                                                                                                                                                 |
| <b>BAPKUB</b> | $D(2)$      | *O1-H1 <sub>(-COOH)</sub> ...O4A <sub>(-SO4)</sub><br>*N1-H2 <sub>(-NH3+)</sub> ...Br1<br>*N1-H3 <sub>(-NH3+)</sub> ...O3 <sub>(-SO4)</sub><br>*N1-H4 <sub>(-NH3+)</sub> ...Br2<br>*N2-H5 <sub>(-NH3+)</sub> ...O3 <sub>(-SO4)</sub><br>*N2-H5 <sub>(-NH3+)</sub> ...O4A <sub>(-SO4)</sub><br>*N2-H6 <sub>(-NH3+)</sub> ...Br1<br>*N2-H7 <sub>(-NH3+)</sub> ...Br2                                                                                                                                                                                                                                                                                                                                                                                                                                                                                                                                                |
|               | $D_1^1(3)$  | *(N1-H2 <sub>(-NH3+)</sub> ...Br1) <sub>2</sub><br>*(N1-H4 <sub>(-NH3+)</sub> ...Br2) <sub>2</sub><br>*(N2-H6 <sub>(-NH3+)</sub> ...Br1) <sub>2</sub><br>*(N2-H7 <sub>(-NH3+)</sub> ...Br2) <sub>2</sub>                                                                                                                                                                                                                                                                                                                                                                                                                                                                                                                                                                                                                                                                                                          |
|               | $D_2^2(5)$  | *O1-H1 <sub>(-COOH)</sub> ...O4A <sub>(-SO4)</sub> & O1-H3 <sub>(-COOH)</sub> ...O3 <sub>(-SO4)</sub><br>*N1-H3 <sub>(-NH3+)</sub> ...O3 <sub>(-SO4)</sub> & N1-H3 <sub>(-NH3+)</sub> ...O3A <sub>(-SO4)</sub><br>*N2-H5 <sub>(-NH3+)</sub> ...O3A <sub>(-SO4)</sub> & N2-H5 <sub>(-NH3+)</sub> ...O3 <sub>(-SO4)</sub><br>*N2-H5 <sub>(-NH3+)</sub> ...O4A <sub>(-SO4)</sub> & N2-H5 <sub>(-NH3+)</sub> ...O4 <sub>(-SO4)</sub>                                                                                                                                                                                                                                                                                                                                                                                                                                                                                  |
|               | $R_2^2(12)$ | (C4-H12...O1 <sub>(-COOH)</sub> ) <sub>2</sub> ornithine                                                                                                                                                                                                                                                                                                                                                                                                                                                                                                                                                                                                                                                                                                                                                                                                                                                          |
| level 2       | $D_2^2(8)$  | *O1-H1 <sub>(-COOH)</sub> ...O4A <sub>(-SO4)</sub> & N1-H2 <sub>(-NH3+)</sub> ...Br1<br>*O1-H1 <sub>(-COOH)</sub> ...O4A <sub>(-SO4)</sub> & N1-H4 <sub>(-NH3+)</sub> ...Br2                                                                                                                                                                                                                                                                                                                                                                                                                                                                                                                                                                                                                                                                                                                                      |

|             |                                                                                                                                                                                                                                                                                                                                                                                                                                                                                                                                                                                                                                                                                                                                                                                                                                                                                                                                                                                                                                            |
|-------------|--------------------------------------------------------------------------------------------------------------------------------------------------------------------------------------------------------------------------------------------------------------------------------------------------------------------------------------------------------------------------------------------------------------------------------------------------------------------------------------------------------------------------------------------------------------------------------------------------------------------------------------------------------------------------------------------------------------------------------------------------------------------------------------------------------------------------------------------------------------------------------------------------------------------------------------------------------------------------------------------------------------------------------------------|
| $D_3^2(9)$  | *O1-H1 <sub>(-COOH)</sub> ...O4A <sub>(-SO4)</sub> & N1-H2 <sub>(-NH3+)</sub> ...Br1<br>*O1-H1 <sub>(-COOH)</sub> ...O4 <sub>(-SO4)</sub> & (N1-H4 <sub>(-NH3+)</sub> ...Br) <sub>2</sub>                                                                                                                                                                                                                                                                                                                                                                                                                                                                                                                                                                                                                                                                                                                                                                                                                                                  |
| $D_3^3(11)$ | *O1-H1 <sub>(-COOH)</sub> ...O4A <sub>(-SO4)</sub> & (N1-H2 <sub>(-NH3+)</sub> ...Br) <sub>1</sub> <sub>2</sub><br>*O1-H1 <sub>(-COOH)</sub> ...O4 <sub>(-SO4)</sub> & O1-H1 <sub>(-COOH)</sub> ...O4A <sub>(-SO4)</sub> & N1-H4 <sub>(-NH3+)</sub> ...Br2                                                                                                                                                                                                                                                                                                                                                                                                                                                                                                                                                                                                                                                                                                                                                                                 |
| $C_4^3(16)$ | *O1-H1 <sub>(-COOH)</sub> ...O4 <sub>(-SO4)</sub> & O1-H1 <sub>(-COOH)</sub> ...O4A <sub>(-SO4)</sub> & (N1-H2 <sub>(-NH3+)</sub> ...Br) <sub>1</sub> <sub>2</sub><br>*O1-H1 <sub>(-COOH)</sub> ...O4 <sub>(-SO4)</sub> & O1-H1 <sub>(-COOH)</sub> ...O4A <sub>(-SO4)</sub> & (N1-H4 <sub>(-NH3+)</sub> ...Br) <sub>2</sub> <sub>2</sub>                                                                                                                                                                                                                                                                                                                                                                                                                                                                                                                                                                                                                                                                                                   |
| $C_2^2(9)$  | O1-H1 <sub>(-COOH)</sub> ...O4A <sub>(-SO4)</sub> & N1-H3 <sub>(-NH3+)</sub> ...O3 <sub>(-SO4)</sub>                                                                                                                                                                                                                                                                                                                                                                                                                                                                                                                                                                                                                                                                                                                                                                                                                                                                                                                                       |
| $C_4^4(18)$ | O1-H1 <sub>(-COOH)</sub> ...O4 <sub>(-SO4)</sub> & O1-H1 <sub>(-COOH)</sub> ...O4 <sub>(-SO4)</sub> & N1-H3 <sub>(-NH3+)</sub> ...O3 <sub>(-SO4)</sub> & N1-H3 <sub>(-NH3+)</sub> ...O3A <sub>(-SO4)</sub>                                                                                                                                                                                                                                                                                                                                                                                                                                                                                                                                                                                                                                                                                                                                                                                                                                 |
| $C_2^2(12)$ | O1-H1 <sub>(-COOH)</sub> ...O4A <sub>(-SO4)</sub> & N2-H5 <sub>(-NH3+)</sub> ...O3 <sub>(-SO4)</sub>                                                                                                                                                                                                                                                                                                                                                                                                                                                                                                                                                                                                                                                                                                                                                                                                                                                                                                                                       |
| $C_1^1(10)$ | O1-H1 <sub>(-COOH)</sub> ...O4A <sub>(-SO4)</sub> & N2-H5 <sub>(-NH3+)</sub> ...O4A <sub>(-SO4)</sub>                                                                                                                                                                                                                                                                                                                                                                                                                                                                                                                                                                                                                                                                                                                                                                                                                                                                                                                                      |
| $C_2^2(12)$ | O1-H1 <sub>(-COOH)</sub> ...O4A <sub>(-SO4)</sub> & N2-H5 <sub>(-NH3+)</sub> ...O4 <sub>(-SO4)</sub>                                                                                                                                                                                                                                                                                                                                                                                                                                                                                                                                                                                                                                                                                                                                                                                                                                                                                                                                       |
| $D_2^2(11)$ | *O1-H1 <sub>(-COOH)</sub> ...O4A <sub>(-SO4)</sub> & N2-H6 <sub>(-NH3+)</sub> ...Br1<br>*O1-H1 <sub>(-COOH)</sub> ...O4A <sub>(-SO4)</sub> & N2-H6 <sub>(-NH3+)</sub> ...Br1<br>*O1-H1 <sub>(-COOH)</sub> ...O4A <sub>(-SO4)</sub> & N2-H7 <sub>(-NH3+)</sub> ...Br2                                                                                                                                                                                                                                                                                                                                                                                                                                                                                                                                                                                                                                                                                                                                                                       |
| $D_3^2(12)$ | *O1-H1 <sub>(-COOH)</sub> ...O4 <sub>(-SO4)</sub> & (N2-H6 <sub>(-NH3+)</sub> ...Br) <sub>1</sub> <sub>2</sub><br>*(N2-H7 <sub>(-NH3+)</sub> ...Br) <sub>2</sub> <sub>2</sub>                                                                                                                                                                                                                                                                                                                                                                                                                                                                                                                                                                                                                                                                                                                                                                                                                                                              |
| $D_3^3(14)$ | O1-H1 <sub>(-COOH)</sub> ...O4 <sub>(-SO4)</sub> & O1-H1 <sub>(-COOH)</sub> ...O4A <sub>(-SO4)</sub> & N2-H6 <sub>(-NH3+)</sub> ...Br1                                                                                                                                                                                                                                                                                                                                                                                                                                                                                                                                                                                                                                                                                                                                                                                                                                                                                                     |
| $D_2^2(5)$  | *N1-H3 <sub>(-NH3+)</sub> ...O3 <sub>(-SO4)</sub> & N1-H2 <sub>(-NH3+)</sub> ...Br2<br>*N1-H2 <sub>(-NH3+)</sub> ...Br1 & N1-H4 <sub>(-NH3+)</sub> ...Br2<br>*N2-H5 <sub>(-NH3+)</sub> ...O3 <sub>(-SO4)</sub> & N2-H6 <sub>(-NH3+)</sub> ...Br1<br>*N2-H5 <sub>(-NH3+)</sub> ...O3 <sub>(-SO4)</sub> & N2-H7 <sub>(-NH3+)</sub> ...Br2<br>*N2-H5 <sub>(-NH3+)</sub> ...O4A <sub>(-SO4)</sub> & N2-H6 <sub>(-NH3+)</sub> ...Br1<br>*N1-H3 <sub>(-NH3+)</sub> ...O3 <sub>(-SO4)</sub> & N1-H4 <sub>(-NH3+)</sub> ...Br2<br>*N2-H5 <sub>(-NH3+)</sub> ...O4A <sub>(-SO4)</sub> & N2-H7 <sub>(-NH3+)</sub> ...Br2<br>*N2-H6 <sub>(-NH3+)</sub> ...Br1 & N2-H7 <sub>(-NH3+)</sub> ...Br2                                                                                                                                                                                                                                                                                                                                                       |
| $C_4^3(20)$ | *N1-H3 <sub>(-NH3+)</sub> ...O3A <sub>(-SO4)</sub> & (N2-H7 <sub>(-NH3+)</sub> ...Br) <sub>2</sub> <sub>2</sub><br>*N2-H5 <sub>(-NH3+)</sub> ...O4 <sub>(-SO4)</sub> & (N1-H4 <sub>(-NH3+)</sub> ...Br) <sub>2</sub> <sub>2</sub>                                                                                                                                                                                                                                                                                                                                                                                                                                                                                                                                                                                                                                                                                                                                                                                                          |
| $D_2^2(10)$ | *N1-H4 <sub>(-NH3+)</sub> ...Br2 & N2-H5 <sub>(-NH3+)</sub> ...O3 <sub>(-SO4)</sub><br>*N2-H5 <sub>(-NH3+)</sub> ...O4A <sub>(-SO4)</sub> & (N1-H4 <sub>(-NH3+)</sub> ...Br) <sub>2</sub> <sub>2</sub><br>*N2-H6 <sub>(-NH3+)</sub> ...Br1 & N1-H4 <sub>(-NH3+)</sub> ...Br2<br>*N1-H4 <sub>(-NH3+)</sub> ...Br2 & (N1-H2 <sub>(-NH3+)</sub> ...Br) <sub>1</sub> <sub>2</sub><br>*N2-H6 <sub>(-NH3+)</sub> ...Br1 & N2-H7 <sub>(-NH3+)</sub> ...Br2<br>*N1-H3 <sub>(-NH3+)</sub> ...O3 <sub>(-SO4)</sub> & N2-H6 <sub>(-NH3+)</sub> ...Br1<br>*N2-H7 <sub>(-NH3+)</sub> ...Br2 & (N2-H6 <sub>(-NH3+)</sub> ...Br) <sub>1</sub> <sub>2</sub> & N1-H3 <sub>(-NH3+)</sub> ...O3 <sub>(-SO4)</sub>                                                                                                                                                                                                                                                                                                                                             |
| $D_3^2(11)$ | *(N1-H4 <sub>(-NH3+)</sub> ...Br) <sub>2</sub> <sub>2</sub> & N2-H5 <sub>(-NH3+)</sub> ...O3A <sub>(-SO4)</sub><br>*(N1-H4 <sub>(-NH3+)</sub> ...Br) <sub>2</sub> <sub>2</sub> & N2-H6 <sub>(-NH3+)</sub> ...Br1<br>*(N1-H2 <sub>(-NH3+)</sub> ...Br) <sub>1</sub> <sub>2</sub> & N2-H5 <sub>(-NH3+)</sub> ...O3A <sub>(-SO4)</sub><br>*(N1-H2 <sub>(-NH3+)</sub> ...Br) <sub>1</sub> <sub>2</sub> & N2-H7 <sub>(-NH3+)</sub> ...Br2<br>*N1-H3 <sub>(-NH3+)</sub> ...O3 <sub>(-SO4)</sub> & (N2-H7 <sub>(-NH3+)</sub> ...Br) <sub>2</sub> <sub>2</sub>                                                                                                                                                                                                                                                                                                                                                                                                                                                                                     |
| $D_3^3(13)$ | *N2-H5 <sub>(-NH3+)</sub> ...O3 <sub>(-SO4)</sub> & N2-H5 <sub>(-NH3+)</sub> ...O3A <sub>(-SO4)</sub> & N1-H4 <sub>(-NH3+)</sub> ...Br2<br>*N2-H5 <sub>(-NH3+)</sub> ...O4 <sub>(-SO4)</sub> & N2-H5 <sub>(-NH3+)</sub> ...O4A <sub>(-SO4)</sub><br>*N1-H3 <sub>(-NH3+)</sub> ...O3A <sub>(-SO4)</sub> & N1-H3 <sub>(-NH3+)</sub> ...O3 <sub>(-SO4)</sub> & (N2-H6 <sub>(-NH3+)</sub> ...Br) <sub>1</sub> <sub>2</sub><br>*N1-H3 <sub>(-NH3+)</sub> ...O3 <sub>(-SO4)</sub> & N2-H7 <sub>(-NH3+)</sub> ...Br2 & N1-H3 <sub>(-NH3+)</sub> ...O3A <sub>(-SO4)</sub>                                                                                                                                                                                                                                                                                                                                                                                                                                                                          |
| $C_4^3(20)$ | *N2-H5 <sub>(-NH3+)</sub> ...O3 <sub>(-SO4)</sub> & N2-H5 <sub>(-NH3+)</sub> ...O3A <sub>(-SO4)</sub> & (N1-H4 <sub>(-NH3+)</sub> ...Br) <sub>2</sub> <sub>2</sub><br>*(N2-H5 <sub>(-NH3+)</sub> ...O3 <sub>(-SO4)</sub> ) <sub>2</sub> & (N1-H2 <sub>(-NH3+)</sub> ...Br) <sub>1</sub> <sub>2</sub><br>*N1-H3 <sub>(-NH3+)</sub> ...O3A <sub>(-SO4)</sub> & N1-H3 <sub>(-NH3+)</sub> ...O3 <sub>(-SO4)</sub> & (N2-H6 <sub>(-NH3+)</sub> ...Br) <sub>1</sub> <sub>2</sub>                                                                                                                                                                                                                                                                                                                                                                                                                                                                                                                                                                 |
| $D_3^2(11)$ | *(N1-H4 <sub>(-NH3+)</sub> ...Br) <sub>2</sub> <sub>2</sub> & N2-H5 <sub>(-NH3+)</sub> ...O4 <sub>(-SO4)</sub><br>*N1-H3 <sub>(-NH3+)</sub> ...O3A <sub>(-SO4)</sub> & (N2-H6 <sub>(-NH3+)</sub> ...Br) <sub>1</sub> <sub>2</sub>                                                                                                                                                                                                                                                                                                                                                                                                                                                                                                                                                                                                                                                                                                                                                                                                          |
| $C_4^2(18)$ | *(N1-H4 <sub>(-NH3+)</sub> ...Br) <sub>2</sub> <sub>2</sub> & (N2-H6 <sub>(-NH3+)</sub> ...Br) <sub>1</sub> <sub>2</sub><br>*(N1-H4 <sub>(-NH3+)</sub> ...Br) <sub>2</sub> <sub>2</sub> & (N2-H7 <sub>(-NH3+)</sub> ...Br) <sub>2</sub> <sub>2</sub>                                                                                                                                                                                                                                                                                                                                                                                                                                                                                                                                                                                                                                                                                                                                                                                       |
| $C_2^1(9)$  | *N1-H4 <sub>(-NH3+)</sub> ...Br2 & N2-H7 <sub>(-NH3+)</sub> ...Br2<br>*N1-H2 <sub>(-NH3+)</sub> ...Br1 & N2-H6 <sub>(-NH3+)</sub> ...Br1<br>*N1-H3 <sub>(-NH3+)</sub> ...O3 <sub>(-SO4)</sub> & N2-H5 <sub>(-NH3+)</sub> ...O3 <sub>(-SO4)</sub>                                                                                                                                                                                                                                                                                                                                                                                                                                                                                                                                                                                                                                                                                                                                                                                           |
| $R_1^2(4)$  | N2-H5 <sub>(-NH3+)</sub> ...O3 <sub>(-SO4)</sub> & N2-H5 <sub>(-NH3+)</sub> ...O4A <sub>(-SO4)</sub>                                                                                                                                                                                                                                                                                                                                                                                                                                                                                                                                                                                                                                                                                                                                                                                                                                                                                                                                       |
| $D_3^2(6)$  | *N2-H5 <sub>(-NH3+)</sub> ...O3A <sub>(-SO4)</sub> & (N2-H6 <sub>(-NH3+)</sub> ...Br) <sub>1</sub> <sub>2</sub><br>*(N2-H7 <sub>(-NH3+)</sub> ...Br) <sub>2</sub> <sub>2</sub> & N2-H5 <sub>(-NH3+)</sub> ...O3A <sub>(-SO4)</sub><br>*N2-H5 <sub>(-NH3+)</sub> ...O4 <sub>(-SO4)</sub> & (N2-H6 <sub>(-NH3+)</sub> ...Br) <sub>1</sub> <sub>2</sub><br>*N1-H3 <sub>(-NH3+)</sub> ...O3A <sub>(-SO4)</sub> & (N1-H2 <sub>(-NH3+)</sub> ...Br) <sub>1</sub> <sub>2</sub><br>*(N1-H2 <sub>(-NH3+)</sub> ...Br) <sub>1</sub> <sub>2</sub> & N1-H4 <sub>(-NH3+)</sub> ...Br2<br>*(N1-H2 <sub>(-NH3+)</sub> ...Br) <sub>1</sub> <sub>2</sub> & (N1-H4 <sub>(-NH3+)</sub> ...Br) <sub>2</sub> <sub>2</sub><br>*N1-H3 <sub>(-NH3+)</sub> ...O3A <sub>(-SO4)</sub> & (N1-H4 <sub>(-NH3+)</sub> ...Br) <sub>2</sub> <sub>2</sub><br>*N2-H5 <sub>(-NH3+)</sub> ...O4 <sub>(-SO4)</sub> & (N2-H7 <sub>(-NH3+)</sub> ...Br) <sub>2</sub> <sub>2</sub><br>*N2-H7 <sub>(-NH3+)</sub> ...Br2 & (N2-H6 <sub>(-NH3+)</sub> ...Br) <sub>1</sub> <sub>2</sub> |
| $D_3^2(8)$  | *N2-H5 <sub>(-NH3+)</sub> ...O3 <sub>(-SO4)</sub> & N2-H5 <sub>(-NH3+)</sub> ...O3A <sub>(-SO4)</sub> & N2-H6 <sub>(-NH3+)</sub> ...Br1<br>*N2-H5 <sub>(-NH3+)</sub> ...O3 <sub>(-SO4)</sub> & N2-H5 <sub>(-NH3+)</sub> ...O3A <sub>(-SO4)</sub> & N2-H7 <sub>(-NH3+)</sub> ...Br2                                                                                                                                                                                                                                                                                                                                                                                                                                                                                                                                                                                                                                                                                                                                                         |

|               |             |                                                                                                                                                                                                                                                                                                                                                                                                                                                                                                                                                                                                                                                                                                                                                                                                                                                                                                                                                                                                                                                                         |
|---------------|-------------|-------------------------------------------------------------------------------------------------------------------------------------------------------------------------------------------------------------------------------------------------------------------------------------------------------------------------------------------------------------------------------------------------------------------------------------------------------------------------------------------------------------------------------------------------------------------------------------------------------------------------------------------------------------------------------------------------------------------------------------------------------------------------------------------------------------------------------------------------------------------------------------------------------------------------------------------------------------------------------------------------------------------------------------------------------------------------|
|               | $C_4^3(10)$ | *N2-H5 <sub>(-NH3+)</sub> ...O3 <sub>(-SO4)</sub> & N2-H5 <sub>(-NH3+)</sub> ...O3A <sub>(-SO4)</sub> & (N2-H6 <sub>(-NH3+)</sub> ...Br1) <sub>2</sub><br>*N2-H5 <sub>(-NH3+)</sub> ...O3 <sub>(-SO4)</sub> & N2-H5 <sub>(-NH3+)</sub> ...O3A <sub>(-SO4)</sub> & (N2-H7 <sub>(-NH3+)</sub> ...Br2) <sub>2</sub><br>*N2-H5 <sub>(-NH3+)</sub> ...O4A <sub>(-SO4)</sub> & N2-H5 <sub>(-NH3+)</sub> ...O4 <sub>(-SO4)</sub> & (N2-H6 <sub>(-NH3+)</sub> ...Br1) <sub>2</sub><br>*N1-H3 <sub>(-NH3+)</sub> ...O3 <sub>(-SO4)</sub> & N1-H3 <sub>(-NH3+)</sub> ...O3A <sub>(-SO4)</sub> & (N1-H2 <sub>(-NH3+)</sub> ...Br1) <sub>2</sub><br>*N1-H3 <sub>(-NH3+)</sub> ...O3 <sub>(-SO4)</sub> & N1-H3 <sub>(-NH3+)</sub> ...O3A <sub>(-SO4)</sub> & (N1-H4 <sub>(-NH3+)</sub> ...Br2) <sub>2</sub>                                                                                                                                                                                                                                                                          |
|               | $D_3^3(8)$  | *N2-H5 <sub>(-NH3+)</sub> ...O4 <sub>(-SO4)</sub> & N2-H5 <sub>(-NH3+)</sub> ...O4A <sub>(-SO4)</sub> & N2-H6 <sub>(-NH3+)</sub> ...Br1<br>*N1-H3 <sub>(-NH3+)</sub> ...O3 <sub>(-SO4)</sub> & N1-H3 <sub>(-NH3+)</sub> ...O3A <sub>(-SO4)</sub> & N1-H2 <sub>(-NH3+)</sub> ...Br1<br>*N1-H3 <sub>(-NH3+)</sub> ...O3 <sub>(-SO4)</sub> & N1-H3 <sub>(-NH3+)</sub> ...O3A <sub>(-SO4)</sub> & N1-H4 <sub>(-NH3+)</sub> ...Br2<br>*N2-H5 <sub>(-NH3+)</sub> ...O4A <sub>(-SO4)</sub> & N2-H5 <sub>(-NH3+)</sub> ...O4 <sub>(-SO4)</sub> & (N2-H7 <sub>(-NH3+)</sub> ...Br2) <sub>2</sub>                                                                                                                                                                                                                                                                                                                                                                                                                                                                                 |
|               | $R_4^2(8)$  | *(N1-H2 <sub>(-NH3+)</sub> ...Br1) <sub>2</sub> & (N1-H4 <sub>(-NH3+)</sub> ...Br2) <sub>2</sub><br>*(N2-H6 <sub>(-NH3+)</sub> ...Br1) <sub>2</sub> & (N2-H7 <sub>(-NH3+)</sub> ...Br2) <sub>2</sub>                                                                                                                                                                                                                                                                                                                                                                                                                                                                                                                                                                                                                                                                                                                                                                                                                                                                    |
|               | $D_3^3(13)$ | N2-H5 <sub>(-NH3+)</sub> ...O3 <sub>(-SO4)</sub> & N2-H5 <sub>(-NH3+)</sub> ...O3A & N1-H2 <sub>(-NH3+)</sub> ...Br1                                                                                                                                                                                                                                                                                                                                                                                                                                                                                                                                                                                                                                                                                                                                                                                                                                                                                                                                                    |
|               | $C_4^2(18)$ | *N2-H5 <sub>(-NH3+)</sub> ...O3 <sub>(-SO4)</sub> & (N2-H6 <sub>(-NH3+)</sub> ...Br1) <sub>2</sub><br>*(N1-H2 <sub>(-NH3+)</sub> ...Br1) <sub>2</sub> & (N2-H7 <sub>(-NH3+)</sub> ...Br2) <sub>2</sub>                                                                                                                                                                                                                                                                                                                                                                                                                                                                                                                                                                                                                                                                                                                                                                                                                                                                  |
|               | $C_2^2(11)$ | N1-H3 <sub>(-NH3+)</sub> ...O3 <sub>(-SO4)</sub> & N2-H5 <sub>(-NH3+)</sub> ...O4A <sub>(-SO4)</sub>                                                                                                                                                                                                                                                                                                                                                                                                                                                                                                                                                                                                                                                                                                                                                                                                                                                                                                                                                                    |
|               | $C_4^3(10)$ | N2-H5 <sub>(-NH3+)</sub> ...O4A <sub>(-SO4)</sub> & N2-H5 <sub>(-NH3+)</sub> ...O4 <sub>(-SO4)</sub> & (N2-H7 <sub>(-NH3+)</sub> ...Br2) <sub>2</sub>                                                                                                                                                                                                                                                                                                                                                                                                                                                                                                                                                                                                                                                                                                                                                                                                                                                                                                                   |
| <b>BEZQOO</b> | $C(5)$      | N1-H4 <sub>(-NH3+)</sub> ...O2 <sub>(-COOH)</sub> <b>ornithine</b>                                                                                                                                                                                                                                                                                                                                                                                                                                                                                                                                                                                                                                                                                                                                                                                                                                                                                                                                                                                                      |
|               | $C_1^2(4)$  | *N2-H12 <sub>(-NH3+)</sub> ...F2 & N2-H13 <sub>(-NH3+)</sub> ...F2<br>*N2-H14 <sub>(-NH3+)</sub> ...F2 & N2-H12 <sub>(-NH3+)</sub> ...F2<br>*N2-H14 <sub>(-NH3+)</sub> ...F3 & N2-H12 <sub>(-NH3+)</sub> ...F3                                                                                                                                                                                                                                                                                                                                                                                                                                                                                                                                                                                                                                                                                                                                                                                                                                                          |
|               | $C_2^1(7)$  | N1-H3 <sub>(-NH3+)</sub> ...F1 & C4-H9 <sub>(-CH2)</sub> ...F1                                                                                                                                                                                                                                                                                                                                                                                                                                                                                                                                                                                                                                                                                                                                                                                                                                                                                                                                                                                                          |
|               | $C_1^2(9)$  | N1-H3 <sub>(-NH3+)</sub> ...F1 & N2-H14 <sub>(-NH3+)</sub> ...F1                                                                                                                                                                                                                                                                                                                                                                                                                                                                                                                                                                                                                                                                                                                                                                                                                                                                                                                                                                                                        |
|               | $C_1^2(10)$ | *O1-H1 <sub>(-COOH)</sub> ...F6 & N2-H12 <sub>(-NH3+)</sub> ...F6<br>*O1-H1 <sub>(-COOH)</sub> ...F6 & N2-H12 <sub>(-NH3+)</sub> ...F3                                                                                                                                                                                                                                                                                                                                                                                                                                                                                                                                                                                                                                                                                                                                                                                                                                                                                                                                  |
|               | $C_2^2(5)$  | N1-H5 <sub>(-NH3+)</sub> ...O3 <sub>(-OH2)</sub> & C2-H2 <sub>(-CH)</sub> ...O3 <sub>(-OH2)</sub>                                                                                                                                                                                                                                                                                                                                                                                                                                                                                                                                                                                                                                                                                                                                                                                                                                                                                                                                                                       |
|               | $C_2^2(6)$  | *N1-H3 <sub>(-NH3+)</sub> ...F1 & N1-H4 <sub>(-NH3+)</sub> ...F5<br>*N2-H13 <sub>(-NH3+)</sub> ...F4 & N2-H12 <sub>(-NH3+)</sub> ...F2<br>*N2-H14 <sub>(-NH3+)</sub> ...F3 & N2-H12 <sub>(-NH3+)</sub> ...F2<br>*N2-H14 <sub>(-NH3+)</sub> ...F1 & N2-H12 <sub>(-NH3+)</sub> ...F2<br>*N2-H12 <sub>(-NH3+)</sub> ...F3 & N2-H13 <sub>(-NH3+)</sub> ...F2<br>*N2-H13 <sub>(-NH3+)</sub> ...F2 & N2-H14 <sub>(-NH3+)</sub> ...F1                                                                                                                                                                                                                                                                                                                                                                                                                                                                                                                                                                                                                                          |
|               | $C_2^2(8)$  | N2-H12 <sub>(-NH3+)</sub> ...F2 & C4-H9 <sub>(-CH2)</sub> ...F1                                                                                                                                                                                                                                                                                                                                                                                                                                                                                                                                                                                                                                                                                                                                                                                                                                                                                                                                                                                                         |
|               | $C_2^2(9)$  | *N1-H3 <sub>(-NH3+)</sub> ...F1 & O1-H1 <sub>(-COOH)</sub> ...F6<br>*N1-H5 <sub>(-NH3+)</sub> ...F5 & O1-H1 <sub>(-COOH)</sub> ...F6<br>*N1-H4 <sub>(-NH3+)</sub> ...F5 & C4-H9 <sub>(-CH2)</sub> ...F1                                                                                                                                                                                                                                                                                                                                                                                                                                                                                                                                                                                                                                                                                                                                                                                                                                                                 |
|               | $C_2^2(10)$ | O1-H1 <sub>(-COOH)</sub> ...F6 & C4-H9 <sub>(-CH2)</sub> ...F1                                                                                                                                                                                                                                                                                                                                                                                                                                                                                                                                                                                                                                                                                                                                                                                                                                                                                                                                                                                                          |
|               | $C_2^2(11)$ | *N1-H3 <sub>(-NH3+)</sub> ...F1 & N2-H12 <sub>(-NH3+)</sub> ...F2<br>*N1-H3 <sub>(-NH3+)</sub> ...F1 & N2-H12 <sub>(-NH3+)</sub> ...F3<br>*N1-H3 <sub>(-NH3+)</sub> ...F1 & N2-H12 <sub>(-NH3+)</sub> ...F6<br>*N1-H3 <sub>(-NH3+)</sub> ...F1 & N2-H13 <sub>(-NH3+)</sub> ...F2<br>*N1-H3 <sub>(-NH3+)</sub> ...F1 & N2-H13 <sub>(-NH3+)</sub> ...F4<br>*N1-H3 <sub>(-NH3+)</sub> ...F1 & N2-H14 <sub>(-NH3+)</sub> ...F2<br>*N1-H3 <sub>(-NH3+)</sub> ...F1 & N2-H14 <sub>(-NH3+)</sub> ...F3<br>*N1-H4 <sub>(-NH3+)</sub> ...F5 & N2-H12 <sub>(-NH3+)</sub> ...F2<br>*N1-H4 <sub>(-NH3+)</sub> ...F5 & N2-H12 <sub>(-NH3+)</sub> ...F3<br>*N1-H4 <sub>(-NH3+)</sub> ...F5 & N2-H12 <sub>(-NH3+)</sub> ...F6<br>*N1-H4 <sub>(-NH3+)</sub> ...F5 & N2-H13 <sub>(-NH3+)</sub> ...F2<br>*N1-H4 <sub>(-NH3+)</sub> ...F5 & N2-H13 <sub>(-NH3+)</sub> ...F4<br>*N1-H4 <sub>(-NH3+)</sub> ...F5 & N2-H14 <sub>(-NH3+)</sub> ...F1<br>*N1-H4 <sub>(-NH3+)</sub> ...F5 & N2-H14 <sub>(-NH3+)</sub> ...F2<br>*N1-H4 <sub>(-NH3+)</sub> ...F5 & N2-H14 <sub>(-NH3+)</sub> ...F3 |
|               | $C_2^2(12)$ | *O1-H1 <sub>(-COOH)</sub> ...F6 & N2-H12 <sub>(-NH3+)</sub> ...F2<br>*O1-H1 <sub>(-COOH)</sub> ...F6 & N2-H12 <sub>(-NH3+)</sub> ...F3<br>*O1-H1 <sub>(-COOH)</sub> ...F6 & N2-H12 <sub>(-NH3+)</sub> ...F4<br>*O1-H1 <sub>(-COOH)</sub> ...F6 & N2-H14 <sub>(-NH3+)</sub> ...F1<br>*O1-H1 <sub>(-COOH)</sub> ...F6 & N2-H14 <sub>(-NH3+)</sub> ...F2<br>*O1-H1 <sub>(-COOH)</sub> ...F6 & N2-H14 <sub>(-NH3+)</sub> ...F3                                                                                                                                                                                                                                                                                                                                                                                                                                                                                                                                                                                                                                              |
|               | $R_2^1(6)$  | N2-H14 <sub>(-NH3+)</sub> ...F1 & C4-H9 <sub>(-CH2)</sub> ...F1                                                                                                                                                                                                                                                                                                                                                                                                                                                                                                                                                                                                                                                                                                                                                                                                                                                                                                                                                                                                         |
|               | $R_1^2(4)$  | *N2-H12 <sub>(-NH3+)</sub> ...F3 & N2-H12 <sub>(-NH3+)</sub> ...F2<br>*N2-H12 <sub>(-NH3+)</sub> ...F2 & N2-H12 <sub>(-NH3+)</sub> ...F6<br>*N2-H12 <sub>(-NH3+)</sub> ...O3 <sub>(-OH2)</sub> & N2-H12 <sub>(-NH3+)</sub> ...F6<br>*N2-H13 <sub>(-NH3+)</sub> ...F2 & N2-H13 <sub>(-NH3+)</sub> ...F4                                                                                                                                                                                                                                                                                                                                                                                                                                                                                                                                                                                                                                                                                                                                                                  |
|               | $R_2^2(8)$  | N2-H14 <sub>(-NH3+)</sub> ...F2 & C4-H9 <sub>(-CH2)</sub> ...F1                                                                                                                                                                                                                                                                                                                                                                                                                                                                                                                                                                                                                                                                                                                                                                                                                                                                                                                                                                                                         |
|               | $D(2)$      | *O1-H1 <sub>(-COOH)</sub> ...F6<br>*O3-H15 <sub>(-OH2)</sub> ...F5                                                                                                                                                                                                                                                                                                                                                                                                                                                                                                                                                                                                                                                                                                                                                                                                                                                                                                                                                                                                      |

|               |             |                                                                                                                                                                                                                                                                                                                                                                                                                                                                                                                                                                                                                                                                                                                                                                                                                                                                             |
|---------------|-------------|-----------------------------------------------------------------------------------------------------------------------------------------------------------------------------------------------------------------------------------------------------------------------------------------------------------------------------------------------------------------------------------------------------------------------------------------------------------------------------------------------------------------------------------------------------------------------------------------------------------------------------------------------------------------------------------------------------------------------------------------------------------------------------------------------------------------------------------------------------------------------------|
|               |             | <p>*O3-H16<sub>(-OH2)</sub> ...F1<br/>           *C2-H2<sub>(-CH)</sub> ...O3<sub>(-OH2)</sub><br/>           *N1-H3<sub>(-NH3+)</sub> ...F1<br/>           *N2-H12<sub>(-NH3+)</sub> ...F2<br/>           *N2-H12<sub>(-NH3+)</sub> ...F3<br/>           *N1-H4<sub>(-NH3+)</sub> ...F5<br/>           *N2-H13<sub>(-NH3+)</sub> ...F4<br/>           *N2-H12<sub>(-NH3+)</sub> ...F6<br/>           *C4-H9<sub>(-CH2)</sub> ...F1<br/>           *N2-H14<sub>(-NH3+)</sub> ...F1<br/>           *N2-H14<sub>(-NH3+)</sub> ...F2<br/>           *N2-H14<sub>(-NH3+)</sub> ...F3</p>                                                                                                                                                                                                                                                                                        |
|               | $D^1_2(3)$  | <p>*O3-H16<sub>(-OH2)</sub> ...F1 &amp; N1-H3<sub>(-NH3+)</sub> ...F1<br/>           *O3-H15<sub>(-OH2)</sub> ...F5 &amp; N1-H4<sub>(-NH3+)</sub> ...F5<br/>           *O3-H16<sub>(-OH2)</sub> ...F1 &amp; C4-H9<sub>(-CH2)</sub> ...F1<br/>           *O3-H16<sub>(-OH2)</sub> ...F1 &amp; N2-H14<sub>(-NH3+)</sub> ...F1</p>                                                                                                                                                                                                                                                                                                                                                                                                                                                                                                                                             |
|               | $D^2_2(4)$  | <p>*O3-H15<sub>(-OH2)</sub> ...F5 &amp; C2-H2<sub>(-CH)</sub> ...O3<sub>(-OH2)</sub><br/>           *O3-H16<sub>(-OH2)</sub> ...F1 &amp; C2-H2<sub>(-CH)</sub> ...O3<sub>(-OH2)</sub><br/>           *O3-H15<sub>(-OH2)</sub> ...F5 &amp; N1-H5<sub>(-NH3+)</sub> ...O3<sub>(-OH2)</sub></p>                                                                                                                                                                                                                                                                                                                                                                                                                                                                                                                                                                                |
|               | $D^2_2(5)$  | <p>*O1-H1<sub>(-COOH)</sub> ...F6 &amp; O3-H15<sub>(-OH2)</sub> ...F5<br/>           *O1-H1<sub>(-COOH)</sub> ...F6 &amp; O3-H16<sub>(-OH2)</sub> ...F1<br/>           *N1-H5<sub>(-NH3+)</sub> ...O3<sub>(-OH2)</sub> &amp; N1-H3<sub>(-NH3+)</sub> ...F1<br/>           *O3-H15<sub>(-OH2)</sub> ...F5 &amp; N1-H3<sub>(-NH3+)</sub> ...F1<br/>           *N1-H5<sub>(-NH3+)</sub> ...O3<sub>(-OH2)</sub> &amp; N1-H4<sub>(-NH3+)</sub> ...F5<br/>           *N1-H4<sub>(-NH3+)</sub> ...F5 &amp; O3-H16<sub>(-OH2)</sub> ...F1<br/>           *O3-H15<sub>(-OH2)</sub> ...F5 &amp; C4-H9<sub>(-CH2)</sub> ...F1<br/>           *O3-H15<sub>(-OH2)</sub> ...F5 &amp; N2-H12<sub>(-NH3+)</sub> ...F3</p>                                                                                                                                                                   |
|               | $D^2_2(6)$  | <p>*N1-H3<sub>(-NH3+)</sub> ...F1 &amp; C2-H2<sub>(-CH)</sub> ...O3<sub>(-OH2)</sub><br/>           *N1-H4<sub>(-NH3+)</sub> ...F5 &amp; C2-H2<sub>(-CH)</sub> ...O3<sub>(-OH2)</sub></p>                                                                                                                                                                                                                                                                                                                                                                                                                                                                                                                                                                                                                                                                                   |
|               | $D^2_2(7)$  | *C2-H2 <sub>(-CH)</sub> ...O3 <sub>(-OH2)</sub> & C4-H9 <sub>(-CH2)</sub> ...F1                                                                                                                                                                                                                                                                                                                                                                                                                                                                                                                                                                                                                                                                                                                                                                                             |
|               | $D^2_2(8)$  | O1-H1 <sub>(-COOH)</sub> ...F6 & N1-H5 <sub>(-NH3+)</sub> ...O3 <sub>(-OH2)</sub>                                                                                                                                                                                                                                                                                                                                                                                                                                                                                                                                                                                                                                                                                                                                                                                           |
|               | $D^2_2(9)$  | <p>*N2-H12<sub>(-NH3+)</sub> ...F2 &amp; C2-H2<sub>(-CH)</sub> ...O3<sub>(-OH2)</sub><br/>           *N2-H12<sub>(-NH3+)</sub> ...F3 &amp; C2-H2<sub>(-CH)</sub> ...O3<sub>(-OH2)</sub><br/>           *N2-H12<sub>(-NH3+)</sub> ...F6 &amp; C2-H2<sub>(-CH)</sub> ...O3<sub>(-OH2)</sub><br/>           *N2-H13<sub>(-NH3+)</sub> ...F2 &amp; C2-H2<sub>(-CH)</sub> ...O3<sub>(-OH2)</sub><br/>           *N2-H13<sub>(-NH3+)</sub> ...F4 &amp; C2-H2<sub>(-CH)</sub> ...O3<sub>(-OH2)</sub><br/>           *N2-H14<sub>(-NH3+)</sub> ...F1 &amp; C2-H2<sub>(-CH)</sub> ...O3<sub>(-OH2)</sub><br/>           *N2-H14<sub>(-NH3+)</sub> ...F2 &amp; C2-H2<sub>(-CH)</sub> ...O3<sub>(-OH2)</sub><br/>           *O3-H15<sub>(-OH2)</sub> ...F5 &amp; N2-H12<sub>(-NH3+)</sub> ...F2<br/>           *O3-H16<sub>(-OH2)</sub> ...F1 &amp; N2-H12<sub>(-NH3+)</sub> ...F2</p> |
|               | $D^2_2(10)$ | N1-H5 <sub>(-NH3+)</sub> ...O3 <sub>(-OH2)</sub> & N2-H12 <sub>(-NH3+)</sub> ...F2                                                                                                                                                                                                                                                                                                                                                                                                                                                                                                                                                                                                                                                                                                                                                                                          |
|               | $D^3_2(8)$  | *N1-H4 <sub>(-NH3+)</sub> ...O2 <sub>(-COOH)</sub> ornithine & (N1-H4 <sub>(-NH3+)</sub> ...F5) <sub>2</sub><br>*N1-H5 <sub>(-NH3+)</sub> ...O3 <sub>(-OH2)</sub> & C4-H9 <sub>(-CH2)</sub> ...F1                                                                                                                                                                                                                                                                                                                                                                                                                                                                                                                                                                                                                                                                           |
|               | $D^3_3(10)$ | *N1-H4 <sub>(-NH3+)</sub> ...O2 <sub>(-COOH)</sub> ornithine & C2-H2 <sub>(-CH)</sub> ...O3 <sub>(-OH2)</sub><br>*(N1-H3 <sub>(-NH3+)</sub> ...F1) <sub>2</sub> & N1-H4 <sub>(-NH3+)</sub> ...O2 <sub>(-COOH)</sub> ornithine<br>*N1-H4 <sub>(-NH3+)</sub> ...O2 <sub>(-COOH)</sub> ornithine & (N1-H5 <sub>(-NH3+)</sub> ...O3 <sub>(-OH2)</sub> ) <sub>2</sub>                                                                                                                                                                                                                                                                                                                                                                                                                                                                                                            |
|               | $D^3_3(12)$ | O1-H1 <sub>(-COOH)</sub> ...F6 & N1-H4 <sub>(-NH3+)</sub> ...O2 <sub>(-COOH)</sub> ornithine & O1-H1 <sub>(-COOH)</sub> ...F6                                                                                                                                                                                                                                                                                                                                                                                                                                                                                                                                                                                                                                                                                                                                               |
|               | $D^3_3(14)$ | *N1-H4 <sub>(-NH3+)</sub> ...O2 <sub>(-COOH)</sub> ornithine & (C4-H9 <sub>(-CH2)</sub> ...F1) <sub>2</sub>                                                                                                                                                                                                                                                                                                                                                                                                                                                                                                                                                                                                                                                                                                                                                                 |
|               | $D^3_3(18)$ | *N1-H4 <sub>(-NH3+)</sub> ...O2 <sub>(-COOH)</sub> ornithine & (N2-H12 <sub>(-NH3+)</sub> ...F2) <sub>2</sub><br>*N1-H4 <sub>(-NH3+)</sub> ...O2 <sub>(-COOH)</sub> ornithine & (N2-H12 <sub>(-NH3+)</sub> ...F3) <sub>2</sub>                                                                                                                                                                                                                                                                                                                                                                                                                                                                                                                                                                                                                                              |
| <b>BIHYEX</b> | $D(2)$      | <p>*O5-H1<sub>(-COOH)</sub> ...O1<sub>(-SO4)</sub><br/>           *O7-H15<sub>(-OH2)</sub> ...O4<sub>(-SO4)</sub><br/>           *O7-H16<sub>(-OH2)</sub> ...O4<sub>(-SO4)</sub><br/>           *O7-H16<sub>(-OH2)</sub> ...O6<sub>(-COOH)</sub><br/>           *N1-H3<sub>(-NH3+)</sub> ...O4<sub>(-SO4)</sub><br/>           *N1-H4<sub>(-NH3+)</sub> ...O7<sub>(-OH2)</sub><br/>           *N1-H5<sub>(-NH3+)</sub> ...O3<sub>(-SO4)</sub><br/>           *N2-H12<sub>(-NH3+)</sub> ...O3<sub>(-SO4)</sub><br/>           *N2-H13<sub>(-NH3+)</sub> ...O2<sub>(-SO4)</sub><br/>           *N2-H14<sub>(-NH3+)</sub> ...O1<sub>(-SO4)</sub><br/>           *N2-H14<sub>(-NH3+)</sub> ...O2<sub>(-SO4)</sub><br/>           *C2-H2<sub>(-CH)</sub> ...O7<sub>(-OH2)</sub></p>                                                                                              |
|               | $C(5)$      | N1-H3 <sub>(-NH3+)</sub> ...O6 <sub>(-COOH)</sub> ornithine                                                                                                                                                                                                                                                                                                                                                                                                                                                                                                                                                                                                                                                                                                                                                                                                                 |
| level 2       | $C^1_2(4)$  | *O7-H15 <sub>(-OH2)</sub> ...O4 <sub>(-SO4)</sub> & O7-H16 <sub>(-OH2)</sub> ...O4 <sub>(-SO4)</sub><br>*N2-H13 <sub>(-NH3+)</sub> ...O2 <sub>(-SO4)</sub> & N2-H14 <sub>(-NH3+)</sub> ...O2 <sub>(-SO4)</sub>                                                                                                                                                                                                                                                                                                                                                                                                                                                                                                                                                                                                                                                              |
|               | $C^1_2(5)$  | N1-H4 <sub>(-NH3+)</sub> ...O7 <sub>(-OH2)</sub> & C2-H2 <sub>(-CH)</sub> ...O7 <sub>(-OH2)</sub>                                                                                                                                                                                                                                                                                                                                                                                                                                                                                                                                                                                                                                                                                                                                                                           |

|  |             |                                                                                                                                                                                                                                                                                                                                                                                                                                                                                                                                                                                                                                                                                                                                                                                                                                                                                                                                                                                                                                                                                                                                                                                                                                                                                                                                                                        |
|--|-------------|------------------------------------------------------------------------------------------------------------------------------------------------------------------------------------------------------------------------------------------------------------------------------------------------------------------------------------------------------------------------------------------------------------------------------------------------------------------------------------------------------------------------------------------------------------------------------------------------------------------------------------------------------------------------------------------------------------------------------------------------------------------------------------------------------------------------------------------------------------------------------------------------------------------------------------------------------------------------------------------------------------------------------------------------------------------------------------------------------------------------------------------------------------------------------------------------------------------------------------------------------------------------------------------------------------------------------------------------------------------------|
|  | $C_2^1(9)$  | N1-H5 <sub>(-NH3+)</sub> ···O3 <sub>(-SO4)</sub> & N2-H12 <sub>(-NH3+)</sub> ···O3 <sub>(-SO4)</sub>                                                                                                                                                                                                                                                                                                                                                                                                                                                                                                                                                                                                                                                                                                                                                                                                                                                                                                                                                                                                                                                                                                                                                                                                                                                                   |
|  | $C_2^1(10)$ | *O5-H1 <sub>(-COOH)</sub> ···O1 <sub>(-SO4)</sub> & N2-H14 <sub>(-NH3+)</sub> ···O1 <sub>(-SO4)</sub><br>*O5-H1 <sub>(-COOH)</sub> ···O1 <sub>(-SO4)</sub> & N2-H13 <sub>(-NH3+)</sub> ···O2 <sub>(-SO4)</sub>                                                                                                                                                                                                                                                                                                                                                                                                                                                                                                                                                                                                                                                                                                                                                                                                                                                                                                                                                                                                                                                                                                                                                         |
|  | $C_2^2(6)$  | *O7-H16 <sub>(-OH2)</sub> ···O6 <sub>(-COOH)</sub> & C2-H2 <sub>(-CH)</sub> ···O7 <sub>(-OH2)</sub><br>*N1-H3 <sub>(-NH3+)</sub> ···O4 <sub>(-SO4)</sub> & N1-H5 <sub>(-NH3+)</sub> ···O3 <sub>(-SO4)</sub><br>*N2-H12 <sub>(-NH3+)</sub> ···O3 <sub>(-SO4)</sub> & N2-H13 <sub>(-NH3+)</sub> ···O2 <sub>(-SO4)</sub><br>*N2-H12 <sub>(-NH3+)</sub> ···O3 <sub>(-SO4)</sub> & N2-H14 <sub>(-NH3+)</sub> ···O1 <sub>(-SO4)</sub><br>*N2-H12 <sub>(-NH3+)</sub> ···O3 <sub>(-SO4)</sub> & N2-H14 <sub>(-NH3+)</sub> ···O2 <sub>(-SO4)</sub><br>*N2-H13 <sub>(-NH3+)</sub> ···O2 <sub>(-SO4)</sub> & N2-H14 <sub>(-NH3+)</sub> ···O1 <sub>(-SO4)</sub>                                                                                                                                                                                                                                                                                                                                                                                                                                                                                                                                                                                                                                                                                                                    |
|  | $C_2^2(7)$  | O7-H16 <sub>(-OH2)</sub> ···O6 <sub>(-COOH)</sub> & N1-H4 <sub>(-NH3+)</sub> ···O7 <sub>(-OH2)</sub>                                                                                                                                                                                                                                                                                                                                                                                                                                                                                                                                                                                                                                                                                                                                                                                                                                                                                                                                                                                                                                                                                                                                                                                                                                                                   |
|  | $C_2^2(9)$  | *O5-H1 <sub>(-COOH)</sub> ···O1 <sub>(-SO4)</sub> & N1-H3 <sub>(-NH3+)</sub> ···O4 <sub>(-SO4)</sub><br>*O5-H1 <sub>(-COOH)</sub> ···O1 <sub>(-SO4)</sub> & N1-H5 <sub>(-NH3+)</sub> ···O3 <sub>(-SO4)</sub>                                                                                                                                                                                                                                                                                                                                                                                                                                                                                                                                                                                                                                                                                                                                                                                                                                                                                                                                                                                                                                                                                                                                                           |
|  | $C_2^2(11)$ | *N1-H3 <sub>(-NH3+)</sub> ···O4 <sub>(-SO4)</sub> & N2-H12 <sub>(-NH3+)</sub> ···O3 <sub>(-SO4)</sub><br>*N1-H3 <sub>(-NH3+)</sub> ···O4 <sub>(-SO4)</sub> & N2-H13 <sub>(-NH3+)</sub> ···O2 <sub>(-SO4)</sub><br>*N1-H3 <sub>(-NH3+)</sub> ···O3 <sub>(-SO4)</sub> & N2-H14 <sub>(-NH3+)</sub> ···O1 <sub>(-SO4)</sub><br>*N1-H3 <sub>(-NH3+)</sub> ···O4 <sub>(-SO4)</sub> & N2-H14 <sub>(-NH3+)</sub> ···O2 <sub>(-SO4)</sub><br>*N1-H5 <sub>(-NH3+)</sub> ···O3 <sub>(-SO4)</sub> & N2-H13 <sub>(-NH3+)</sub> ···O2 <sub>(-SO4)</sub><br>*N1-H5 <sub>(-NH3+)</sub> ···O3 <sub>(-SO4)</sub> & N2-H14 <sub>(-NH3+)</sub> ···O2 <sub>(-SO4)</sub>                                                                                                                                                                                                                                                                                                                                                                                                                                                                                                                                                                                                                                                                                                                     |
|  | $C_2^2(12)$ | *O5-H1 <sub>(-COOH)</sub> ···O1 <sub>(-SO4)</sub> & N2-H12 <sub>(-NH3+)</sub> ···O3 <sub>(-SO4)</sub><br>*O5-H1 <sub>(-COOH)</sub> ···O1 <sub>(-SO4)</sub> & N2-H13 <sub>(-NH3+)</sub> ···O2 <sub>(-SO4)</sub><br>*O5-H1 <sub>(-COOH)</sub> ···O1 <sub>(-SO4)</sub> & N2-H14 <sub>(-NH3+)</sub> ···O2 <sub>(-SO4)</sub>                                                                                                                                                                                                                                                                                                                                                                                                                                                                                                                                                                                                                                                                                                                                                                                                                                                                                                                                                                                                                                                |
|  | $R_1^2(4)$  | N2-H14 <sub>(-NH3+)</sub> ···O1 <sub>(-SO4)</sub> & N2-H14 <sub>(-NH3+)</sub> ···O2 <sub>(-SO4)</sub>                                                                                                                                                                                                                                                                                                                                                                                                                                                                                                                                                                                                                                                                                                                                                                                                                                                                                                                                                                                                                                                                                                                                                                                                                                                                  |
|  | $D_1^2(3)$  | *O7-H15 <sub>(-OH2)</sub> ···O4 <sub>(-SO4)</sub> & N1-H3 <sub>(-NH3+)</sub> ···O4 <sub>(-SO4)</sub><br>*O7-H16 <sub>(-OH2)</sub> ···O4 <sub>(-SO4)</sub> & N1-H3 <sub>(-NH3+)</sub> ···O4 <sub>(-SO4)</sub>                                                                                                                                                                                                                                                                                                                                                                                                                                                                                                                                                                                                                                                                                                                                                                                                                                                                                                                                                                                                                                                                                                                                                           |
|  | $D_1^2(3)$  | O7-H16 <sub>(-OH2)</sub> ···O4 <sub>(-SO4)</sub> & O7-H16 <sub>(-OH2)</sub> ···O6 <sub>(-COOH)</sub>                                                                                                                                                                                                                                                                                                                                                                                                                                                                                                                                                                                                                                                                                                                                                                                                                                                                                                                                                                                                                                                                                                                                                                                                                                                                   |
|  | $D_2^2(4)$  | *O7-H15 <sub>(-OH2)</sub> ···O4 <sub>(-SO4)</sub> & C2-H2 <sub>(-CH)</sub> ···O7 <sub>(-OH2)</sub><br>*O7-H16 <sub>(-OH2)</sub> ···O4 <sub>(-SO4)</sub> & C2-H2 <sub>(-CH)</sub> ···O7 <sub>(-OH2)</sub><br>*O7-H15 <sub>(-OH2)</sub> ···O4 <sub>(-SO4)</sub> & N1-H4 <sub>(-NH3+)</sub> ···O7 <sub>(-OH2)</sub><br>*O7-H16 <sub>(-OH2)</sub> ···O4 <sub>(-SO4)</sub> & N1-H4 <sub>(-NH3+)</sub> ···O7 <sub>(-OH2)</sub>                                                                                                                                                                                                                                                                                                                                                                                                                                                                                                                                                                                                                                                                                                                                                                                                                                                                                                                                               |
|  | $D_2^2(5)$  | *O5-H1 <sub>(-COOH)</sub> ···O1 <sub>(-SO4)</sub> & O7-H15···O4 <sub>(-SO4)</sub><br>*O5-H1 <sub>(-COOH)</sub> ···O1 <sub>(-SO4)</sub> & O7-H16···O4 <sub>(-SO4)</sub><br>*O7-H15 <sub>(-OH2)</sub> ···O4 <sub>(-SO4)</sub> & O7-H16 <sub>(-OH2)</sub> ···O6 <sub>(-COOH)</sub><br>*N1-H5 <sub>(-NH3+)</sub> ···O3 <sub>(-SO4)</sub> & N1-H4 <sub>(-NH3+)</sub> ···O7 <sub>(-OH2)</sub><br>*O7-H15 <sub>(-OH2)</sub> ···O4 <sub>(-SO4)</sub> & N1-H5 <sub>(-NH3+)</sub> ···O3 <sub>(-SO4)</sub><br>*O7-H15 <sub>(-OH2)</sub> ···O4 <sub>(-SO4)</sub> & N2-H13 <sub>(-NH3+)</sub> ···O2 <sub>(-SO4)</sub><br>*O7-H15 <sub>(-OH2)</sub> ···O4 <sub>(-SO4)</sub> & N2-H14 <sub>(-NH3+)</sub> ···O1 <sub>(-SO4)</sub><br>*O7-H15 <sub>(-OH2)</sub> ···O4 <sub>(-SO4)</sub> & N2-H14 <sub>(-NH3+)</sub> ···O2 <sub>(-SO4)</sub><br>*O7-H16 <sub>(-OH2)</sub> ···O4 <sub>(-SO4)</sub> & N1-H5 <sub>(-NH3+)</sub> ···O3 <sub>(-SO4)</sub><br>*O7-H16 <sub>(-OH2)</sub> ···O4 <sub>(-SO4)</sub> & N2-H12 <sub>(-NH3+)</sub> ···O3 <sub>(-SO4)</sub><br>*O7-H16 <sub>(-OH2)</sub> ···O4 <sub>(-SO4)</sub> & N2-H13 <sub>(-NH3+)</sub> ···O2 <sub>(-SO4)</sub><br>*O7-H16 <sub>(-OH2)</sub> ···O4 <sub>(-SO4)</sub> & N2-H14 <sub>(-NH3+)</sub> ···O1 <sub>(-SO4)</sub><br>*O7-H16 <sub>(-OH2)</sub> ···O4 <sub>(-SO4)</sub> & N2-H14 <sub>(-NH3+)</sub> ···O2 <sub>(-SO4)</sub> |
|  | $D_2^2(6)$  | *O5-H1 <sub>(-COOH)</sub> ···O1 <sub>(-SO4)</sub> & O7-H16 <sub>(-OH2)</sub> ···O6 <sub>(-COOH)</sub><br>*N1-H3 <sub>(-NH3+)</sub> ···O4 <sub>(-SO4)</sub> & C2-H2 <sub>(-CH)</sub> ···O7 <sub>(-OH2)</sub><br>*N1-H5 <sub>(-NH3+)</sub> ···O3 <sub>(-SO4)</sub> & C2-H2 <sub>(-CH)</sub> ···O7 <sub>(-OH2)</sub>                                                                                                                                                                                                                                                                                                                                                                                                                                                                                                                                                                                                                                                                                                                                                                                                                                                                                                                                                                                                                                                      |
|  | $D_2^2(7)$  | *O5-H1 <sub>(-COOH)</sub> ···O1 <sub>(-SO4)</sub> & C2-H2 <sub>(-CH)</sub> ···O7 <sub>(-OH2)</sub><br>*O7-H16 <sub>(-OH2)</sub> ···O6 <sub>(-COOH)</sub> & N1-H5 <sub>(-NH3+)</sub> ···O3 <sub>(-SO4)</sub><br>*O7-H16 <sub>(-OH2)</sub> ···O6 <sub>(-COOH)</sub> & N1-H3 <sub>(-NH3+)</sub> ···O4 <sub>(-SO4)</sub>                                                                                                                                                                                                                                                                                                                                                                                                                                                                                                                                                                                                                                                                                                                                                                                                                                                                                                                                                                                                                                                   |
|  | $D_2^2(8)$  | O5-H1 <sub>(-COOH)</sub> ···O1 <sub>(-SO4)</sub> & N1-H4 <sub>(-NH3+)</sub> ···O7 <sub>(-OH2)</sub>                                                                                                                                                                                                                                                                                                                                                                                                                                                                                                                                                                                                                                                                                                                                                                                                                                                                                                                                                                                                                                                                                                                                                                                                                                                                    |
|  | $D_2^2(9)$  | *N2-H12 <sub>(-NH3+)</sub> ···O3 <sub>(-SO4)</sub> & C2-H2 <sub>(-CH)</sub> ···O7 <sub>(-OH2)</sub><br>*N2-H13 <sub>(-NH3+)</sub> ···O2 <sub>(-SO4)</sub> & C2-H2 <sub>(-CH)</sub> ···O7 <sub>(-OH2)</sub><br>*N2-H14 <sub>(-NH3+)</sub> ···O1 <sub>(-SO4)</sub> & C2-H2 <sub>(-CH)</sub> ···O7 <sub>(-OH2)</sub><br>*N2-H14 <sub>(-NH3+)</sub> ···O2 <sub>(-SO4)</sub> & C2-H2 <sub>(-CH)</sub> ···O7 <sub>(-OH2)</sub>                                                                                                                                                                                                                                                                                                                                                                                                                                                                                                                                                                                                                                                                                                                                                                                                                                                                                                                                               |
|  | $D_2^2(10)$ | *O7-H16 <sub>(-OH2)</sub> ···O6 <sub>(-COOH)</sub> & N2-H12 <sub>(-NH3+)</sub> ···O3 <sub>(-SO4)</sub><br>*O7-H16 <sub>(-OH2)</sub> ···O6 <sub>(-COOH)</sub> & N2-H13 <sub>(-NH3+)</sub> ···O2 <sub>(-SO4)</sub><br>*O7-H16 <sub>(-OH2)</sub> ···O6 <sub>(-COOH)</sub> & N2-H14 <sub>(-NH3+)</sub> ···O1 <sub>(-SO4)</sub><br>*O7-H16 <sub>(-OH2)</sub> ···O6 <sub>(-COOH)</sub> & N2-H14 <sub>(-NH3+)</sub> ···O2 <sub>(-SO4)</sub><br>*N1-H4 <sub>(-NH3+)</sub> ···O7 <sub>(-OH2)</sub> & N2-H12 <sub>(-NH3+)</sub> ···O3 <sub>(-SO4)</sub><br>*N1-H4 <sub>(-NH3+)</sub> ···O7 <sub>(-OH2)</sub> & N2-H13 <sub>(-NH3+)</sub> ···O2 <sub>(-SO4)</sub><br>*N1-H4 <sub>(-NH3+)</sub> ···O7 <sub>(-OH2)</sub> & N2-H14 <sub>(-NH3+)</sub> ···O1 <sub>(-SO4)</sub><br>*N1-H4 <sub>(-NH3+)</sub> ···O7 <sub>(-OH2)</sub> & N2-H14 <sub>(-NH3+)</sub> ···O2 <sub>(-SO4)</sub>                                                                                                                                                                                                                                                                                                                                                                                                                                                                                               |
|  | $D_3^2(8)$  | (O7-H16 <sub>(-OH2)</sub> ···O6 <sub>(-COOH)</sub> ) <sub>2</sub> & N1-H3 <sub>(-NH3+)</sub> ···O6 <sub>(-COOH)</sub> <b>ornithine</b>                                                                                                                                                                                                                                                                                                                                                                                                                                                                                                                                                                                                                                                                                                                                                                                                                                                                                                                                                                                                                                                                                                                                                                                                                                 |
|  | $D_3^3(8)$  | N1-H3 <sub>(-NH3+)</sub> ···O4 <sub>(-SO4)</sub> & N1-H3 <sub>(-NH3+)</sub> ···O6 <sub>(-COOH)</sub> <b>ornithine</b>                                                                                                                                                                                                                                                                                                                                                                                                                                                                                                                                                                                                                                                                                                                                                                                                                                                                                                                                                                                                                                                                                                                                                                                                                                                  |
|  | $D_3^3(10)$ | *N1-H3 <sub>(-NH3+)</sub> ···O6 <sub>(-COOH)</sub> <b>ornithine</b> & C2-H2 <sub>(-CH)</sub> ···O7 <sub>(-OH2)</sub>                                                                                                                                                                                                                                                                                                                                                                                                                                                                                                                                                                                                                                                                                                                                                                                                                                                                                                                                                                                                                                                                                                                                                                                                                                                   |
|  | $D_3^3(12)$ | O5-H1 <sub>(-COOH)</sub> ···O1 <sub>(-SO4)</sub> & N1-H3 <sub>(-NH3+)</sub> ···O6 <sub>(-COOH)</sub> <b>ornithine</b>                                                                                                                                                                                                                                                                                                                                                                                                                                                                                                                                                                                                                                                                                                                                                                                                                                                                                                                                                                                                                                                                                                                                                                                                                                                  |

|               |             |                                                                                                                                                                                                                                                                                                                                                                                                                                                                                                                                                                                                                                                                                                                                                                                                             |
|---------------|-------------|-------------------------------------------------------------------------------------------------------------------------------------------------------------------------------------------------------------------------------------------------------------------------------------------------------------------------------------------------------------------------------------------------------------------------------------------------------------------------------------------------------------------------------------------------------------------------------------------------------------------------------------------------------------------------------------------------------------------------------------------------------------------------------------------------------------|
|               | $D_3^3(18)$ | *N1-H3 <sub>(-NH3+)</sub> ...O6 <sub>(-COOH)</sub> ornithine & (N2-H12 <sub>(-NH3+)</sub> ...O3 <sub>(-SO4)</sub> ) <sub>2</sub><br>*N1-H3 <sub>(-NH3+)</sub> ...O6 <sub>(-COOH)</sub> ornithine & (N2-H13 <sub>(-NH3+)</sub> ...O2 <sub>(-SO4)</sub> ) <sub>2</sub><br>*N1-H3 <sub>(-NH3+)</sub> ...O6 <sub>(-COOH)</sub> ornithine & (N2-H14 <sub>(-NH3+)</sub> ...O1 <sub>(-SO4)</sub> ) <sub>2</sub><br>*N1-H3 <sub>(-NH3+)</sub> ...O6 <sub>(-COOH)</sub> ornithine & (N2-H14 <sub>(-NH3+)</sub> ...O2 <sub>(-SO4)</sub> ) <sub>2</sub>                                                                                                                                                                                                                                                                |
| <b>CAPRAM</b> | $C(4)$      | *C2-H4 <sub>(-CH)</sub> ...O1 <sub>(-COO-)</sub> ornithine<br>*C7-H17 <sub>(-CH)</sub> ...O3 <sub>(-COO-)</sub>                                                                                                                                                                                                                                                                                                                                                                                                                                                                                                                                                                                                                                                                                             |
|               | $C(6)$      | N3-H14 <sub>(-NH3+)</sub> ...O5 <sub>(-COO-)</sub> & N3-H15 <sub>(-NH3+)</sub> ...O5 <sub>(-COO-)</sub>                                                                                                                                                                                                                                                                                                                                                                                                                                                                                                                                                                                                                                                                                                     |
|               | $C(8)$      | *N2-H11 <sub>(-NH3+)</sub> ...O1 <sub>(-COO-)</sub> ornithine<br>*N2-H11 <sub>(-NH3+)</sub> ...O2 <sub>(-COO-)</sub> ornithine<br>*N2-H13 <sub>(-NH3+)</sub> ...O2 <sub>(-COO-)</sub> ornithine                                                                                                                                                                                                                                                                                                                                                                                                                                                                                                                                                                                                             |
|               | $D(2)$      | *O7-H20B <sub>(-OH2)</sub> ...O6 <sub>(-COO-)</sub><br>*N1-H1 <sub>(-NH3+)</sub> ...O4 <sub>(-COO-)</sub><br>*N1-H2 <sub>(-NH3+)</sub> ...O3 <sub>(-COO-)</sub><br>*N1-H2 <sub>(-NH3+)</sub> ...O4 <sub>(-COO-)</sub><br>*N1-H3 <sub>(-NH3+)</sub> ...O3 <sub>(-COO-)</sub><br>*N2-H12 <sub>(-NH3+)</sub> ...O6 <sub>(-COO-)</sub><br>*N3-H16 <sub>(-NH3+)</sub> ...O1 <sub>(-COO-)</sub>                                                                                                                                                                                                                                                                                                                                                                                                                   |
| level 2       | $C_2^1(4)$  | *N1-H1 <sub>(-NH3+)</sub> ...O4 <sub>(-COO-)</sub> & N1-H2 <sub>(-NH3+)</sub> ...O4 <sub>(-COO-)</sub><br>*N2-H11 <sub>(-NH3+)</sub> ...O2 <sub>(-COO-)</sub> ornithine & N2-H13 <sub>(-NH3+)</sub> ...O2 <sub>(-COO-)</sub> ornithine<br>*N2-H11 <sub>(-NH3+)</sub> ...O2 <sub>(-COO-)</sub> ornithine & (N3-H16 <sub>(-NH3+)</sub> ...O1 <sub>(-COO-)</sub> ) <sub>2</sub><br>*N3-H14 <sub>(-NH3+)</sub> ...O5 <sub>(-COO-)</sub> & N3-H15 <sub>(-NH3+)</sub> ...O5 <sub>(-COO-)</sub>                                                                                                                                                                                                                                                                                                                    |
|               | $C_2^1(8)$  | N2-H11 <sub>(-NH3+)</sub> ...O1 <sub>(-COO-)</sub> ornithine & C2-H4 <sub>(-CH)</sub> ...O1 <sub>(-COO-)</sub> ornithine                                                                                                                                                                                                                                                                                                                                                                                                                                                                                                                                                                                                                                                                                    |
|               | $C_2^2(6)$  | *N1-H1 <sub>(-NH3+)</sub> ...O4 <sub>(-COO-)</sub> & N1-H2 <sub>(-NH3+)</sub> ...O3 <sub>(-COO-)</sub><br>*N1-H1 <sub>(-NH3+)</sub> ...O4 <sub>(-COO-)</sub> & N1-H3 <sub>(-NH3+)</sub> ...O3 <sub>(-COO-)</sub><br>*N1-H11 <sub>(-NH3+)</sub> ...O1 <sub>(-COO-)</sub> ornithine & N2-H13 <sub>(-NH3+)</sub> ...O2 <sub>(-COO-)</sub> ornithine                                                                                                                                                                                                                                                                                                                                                                                                                                                            |
|               | $C_2^2(10)$ | *N1-H2 <sub>(-NH3+)</sub> ...O3 <sub>(-COO-)</sub> & N3-H16 <sub>(-NH3+)</sub> ...O1 <sub>(-COO-)</sub><br>*N1-H2 <sub>(-NH3+)</sub> ...O4 <sub>(-COO-)</sub> & N3-H16 <sub>(-NH3+)</sub> ...O1 <sub>(-COO-)</sub><br>*N1-H3 <sub>(-NH3+)</sub> ...O3 <sub>(-COO-)</sub> & N3-H16 <sub>(-NH3+)</sub> ...O1 <sub>(-COO-)</sub><br>*N2-H11 <sub>(-NH3+)</sub> ...O1 <sub>(-COO-)</sub> ornithine & C2-H4 <sub>(-CH)</sub> ...O1 <sub>(-COO-)</sub> ornithine<br>*N2-H13 <sub>(-NH3+)</sub> ...O2 <sub>(-COO-)</sub> ornithine & C2-H4 <sub>(-CH)</sub> ...O1 <sub>(-COO-)</sub> ornithine<br>*N3-H14 <sub>(-NH3+)</sub> ...O5 <sub>(-COO-)</sub> & C7-H17 <sub>(-CH)</sub> ...O3 <sub>(-COO-)</sub><br>*N3-H14 <sub>(-NH3+)</sub> ...O5 <sub>(-COO-)</sub> & C7-H17 <sub>(-CH)</sub> ...O3 <sub>(-COO-)</sub> |
|               | $C_2^2(11)$ | *N3-H15 <sub>(-NH3+)</sub> ...O5 <sub>(-COO-)</sub> & C7-H17 <sub>(-CH)</sub> ...O3 <sub>(-COO-)</sub><br>*N3-H15 <sub>(-NH3+)</sub> ...O5 <sub>(-COO-)</sub> & C7-H17 <sub>(-CH)</sub> ...O3 <sub>(-COO-)</sub>                                                                                                                                                                                                                                                                                                                                                                                                                                                                                                                                                                                            |
|               | $C_2^2(12)$ | *N2-H11 <sub>(-NH3+)</sub> ...O1 <sub>(-COO-)</sub> ornithine & C2-H4 <sub>(-CH)</sub> ...O1 <sub>(-COO-)</sub> ornithine<br>*N2-H13 <sub>(-NH3+)</sub> ...O2 <sub>(-COO-)</sub> ornithine & C2-H4 <sub>(-CH)</sub> ...O1 <sub>(-COO-)</sub> ornithine                                                                                                                                                                                                                                                                                                                                                                                                                                                                                                                                                      |
|               | $C_2^2(14)$ | *N1-H2 <sub>(-NH3+)</sub> ...O3 <sub>(-COO-)</sub> & N2-H12 <sub>(-NH3+)</sub> ...O6 <sub>(-COO-)</sub><br>*N1-H2 <sub>(-NH3+)</sub> ...O4 <sub>(-COO-)</sub> & N2-H12 <sub>(-NH3+)</sub> ...O6 <sub>(-COO-)</sub><br>*N1-H3 <sub>(-NH3+)</sub> ...O3 <sub>(-COO-)</sub> & N2-H12 <sub>(-NH3+)</sub> ...O6 <sub>(-COO-)</sub><br>*N2-H12 <sub>(-NH3+)</sub> ...O6 <sub>(-COO-)</sub> & N3-H16 <sub>(-NH3+)</sub> ...O1 <sub>(-COO-)</sub>                                                                                                                                                                                                                                                                                                                                                                   |
|               | $C_2^2(16)$ | N2-H11 <sub>(-NH3+)</sub> ...O1 <sub>(-COO-)</sub> ornithine & N2-H11 <sub>(-NH3+)</sub> ...O2 <sub>(-COO-)</sub> ornithine                                                                                                                                                                                                                                                                                                                                                                                                                                                                                                                                                                                                                                                                                 |
|               | $C_3^3(12)$ | *(O7-H20B <sub>(-OH2)</sub> ...O6 <sub>(-COO-)</sub> ) <sub>2</sub> & N3-H14 <sub>(-NH3+)</sub> ...O5 <sub>(-COO-)</sub><br>*(O7-H20B <sub>(-OH2)</sub> ...O6 <sub>(-COO-)</sub> ) <sub>2</sub> & N3-H15 <sub>(-NH3+)</sub> ...O5 <sub>(-COO-)</sub>                                                                                                                                                                                                                                                                                                                                                                                                                                                                                                                                                        |
|               | $C_3^3(14)$ | (O7-H20B <sub>(-OH2)</sub> ...O6 <sub>(-COO-)</sub> ) <sub>2</sub> & C7-H17 <sub>(-CH)</sub> ...O3 <sub>(-COO-)</sub>                                                                                                                                                                                                                                                                                                                                                                                                                                                                                                                                                                                                                                                                                       |
|               | $R_1^2(4)$  | *N1-H2 <sub>(-NH3+)</sub> ...O3 <sub>(-COO-)</sub> & N1-H2 <sub>(-NH3+)</sub> ...O4 <sub>(-COO-)</sub><br>*N2-H11 <sub>(-NH3+)</sub> ...O1 <sub>(-COO-)</sub> ornithine & N2-H11 <sub>(-NH3+)</sub> ...O2 <sub>(-COO-)</sub> ornithine                                                                                                                                                                                                                                                                                                                                                                                                                                                                                                                                                                      |
|               | $R_2^2(12)$ | N3-H14 <sub>(-NH3+)</sub> ...O5 <sub>(-COO-)</sub> & N3-H15 <sub>(-NH3+)</sub> ...O5 <sub>(-COO-)</sub>                                                                                                                                                                                                                                                                                                                                                                                                                                                                                                                                                                                                                                                                                                     |
|               | $R_2^2(16)$ | *N2-H11 <sub>(-NH3+)</sub> ...O1 <sub>(-COO-)</sub> ornithine & N2-H13 <sub>(-NH3+)</sub> ...O2 <sub>(-COO-)</sub> ornithine<br>*N2-H11 <sub>(-NH3+)</sub> ...O1 <sub>(-COO-)</sub> ornithine & N2-H13 <sub>(-NH3+)</sub> ...O2 <sub>(-COO-)</sub> ornithine                                                                                                                                                                                                                                                                                                                                                                                                                                                                                                                                                |
|               | $R_3^2(16)$ | (N2-H11 <sub>(-NH3+)</sub> ...O1 <sub>(-COO-)</sub> ornithine) <sub>2</sub> & C2-H4 <sub>(-CH)</sub> ...O1 <sub>(-COO-)</sub> ornithine                                                                                                                                                                                                                                                                                                                                                                                                                                                                                                                                                                                                                                                                     |
|               | $R_3^3(10)$ | (N3-H15 <sub>(-NH3+)</sub> ...O5 <sub>(-COO-)</sub> ) <sub>2</sub> & C7-H17 <sub>(-CH)</sub> ...O3 <sub>(-COO-)</sub>                                                                                                                                                                                                                                                                                                                                                                                                                                                                                                                                                                                                                                                                                       |
|               | $R_3^3(16)$ | (N3-H14 <sub>(-NH3+)</sub> ...O5 <sub>(-COO-)</sub> ) <sub>2</sub> & C7-H17 <sub>(-CH)</sub> ...O3 <sub>(-COO-)</sub>                                                                                                                                                                                                                                                                                                                                                                                                                                                                                                                                                                                                                                                                                       |
|               | $R_3^3(18)$ | (N2-H11 <sub>(-NH3+)</sub> ...O2 <sub>(-COO-)</sub> ornithine) <sub>2</sub> & C2-H4 <sub>(-CH)</sub> ...O1 <sub>(-COO-)</sub> ornithine                                                                                                                                                                                                                                                                                                                                                                                                                                                                                                                                                                                                                                                                     |
|               | $R_3^3(20)$ | (N2-H13 <sub>(-NH3+)</sub> ...O2 <sub>(-COO-)</sub> ornithine) <sub>2</sub> & C2-H4 <sub>(-CH)</sub> ...O1 <sub>(-COO-)</sub> ornithine                                                                                                                                                                                                                                                                                                                                                                                                                                                                                                                                                                                                                                                                     |
|               | $R_4^3(20)$ | (N2-H11 <sub>(-NH3+)</sub> ...O1 <sub>(-COO-)</sub> ornithine) <sub>2</sub> & (C2-H4 <sub>(-CH)</sub> ...O1 <sub>(-COO-)</sub> ornithine) <sub>2</sub>                                                                                                                                                                                                                                                                                                                                                                                                                                                                                                                                                                                                                                                      |
|               | $R_4^4(12)$ | (N1-H2 <sub>(-NH3+)</sub> ...O4 <sub>(-COO-)</sub> ) <sub>2</sub> & (N1-H3 <sub>(-NH3+)</sub> ...O3 <sub>(-COO-)</sub> ) <sub>2</sub>                                                                                                                                                                                                                                                                                                                                                                                                                                                                                                                                                                                                                                                                       |
|               | $R_4^4(20)$ | *(N3-H14 <sub>(-NH3+)</sub> ...O5 <sub>(-COO-)</sub> ) <sub>2</sub> & (C7-H17 <sub>(-CH)</sub> ...O3 <sub>(-COO-)</sub> ) <sub>2</sub><br>*(N3-H15 <sub>(-NH3+)</sub> ...O5 <sub>(-COO-)</sub> ) <sub>2</sub> & (C7-H17 <sub>(-CH)</sub> ...O3 <sub>(-COO-)</sub> ) <sub>2</sub>                                                                                                                                                                                                                                                                                                                                                                                                                                                                                                                            |
|               | $R_4^2(8)$  | (N1-H2 <sub>(-NH3+)</sub> ...O3 <sub>(-COO-)</sub> ) <sub>2</sub> & (N1-H3 <sub>(-NH3+)</sub> ...O3 <sub>(-COO-)</sub> ) <sub>2</sub>                                                                                                                                                                                                                                                                                                                                                                                                                                                                                                                                                                                                                                                                       |
|               | $R_4^4(20)$ | (N1-H1 <sub>(-NH3+)</sub> ...O4 <sub>(-COO-)</sub> ) <sub>2</sub> & (N3-H16 <sub>(-NH3+)</sub> ...O1 <sub>(-COO-)</sub> ) <sub>2</sub>                                                                                                                                                                                                                                                                                                                                                                                                                                                                                                                                                                                                                                                                      |
|               | $D_2^1(3)$  | O7-H20B <sub>(-OH2)</sub> ...O6 <sub>(-COO-)</sub> & N2-H12 <sub>(-NH3+)</sub> ...O6 <sub>(-COO-)</sub>                                                                                                                                                                                                                                                                                                                                                                                                                                                                                                                                                                                                                                                                                                     |
|               | $D_2^2(8)$  | *O7-H20B <sub>(-OH2)</sub> ...O6 <sub>(-COO-)</sub> & (N1-H2 <sub>(-NH3+)</sub> ...O3 <sub>(-COO-)</sub> ) <sub>2</sub><br>*O7-H20B <sub>(-OH2)</sub> ...O6 <sub>(-COO-)</sub> & N1-H2 <sub>(-NH3+)</sub> ...O4 <sub>(-COO-)</sub><br>*O7-H20B <sub>(-OH2)</sub> ...O6 <sub>(-COO-)</sub> & N1-H3 <sub>(-NH3+)</sub> ...O3 <sub>(-COO-)</sub><br>*O7-H20B <sub>(-OH2)</sub> ...O6 <sub>(-COO-)</sub> & N3-H16 <sub>(-NH3+)</sub> ...O1 <sub>(-COO-)</sub>                                                                                                                                                                                                                                                                                                                                                   |

|               |             |                                                                                                                                                                                                                                                                                                                                                                                                                                                                                                                                                                                                                                                                                                                                                                                                                                                                                                                                                                                                                                                                                                                                                                                                                                                                                                                                                                                                                                                          |
|---------------|-------------|----------------------------------------------------------------------------------------------------------------------------------------------------------------------------------------------------------------------------------------------------------------------------------------------------------------------------------------------------------------------------------------------------------------------------------------------------------------------------------------------------------------------------------------------------------------------------------------------------------------------------------------------------------------------------------------------------------------------------------------------------------------------------------------------------------------------------------------------------------------------------------------------------------------------------------------------------------------------------------------------------------------------------------------------------------------------------------------------------------------------------------------------------------------------------------------------------------------------------------------------------------------------------------------------------------------------------------------------------------------------------------------------------------------------------------------------------------|
|               | $D_3^2(6)$  | $(O7-H20B_{(-OH2)} \cdots O6_{(-COO-)} )_2$ & $N2-H12_{(-NH3+)} \cdots O6_{(-COO-)}$                                                                                                                                                                                                                                                                                                                                                                                                                                                                                                                                                                                                                                                                                                                                                                                                                                                                                                                                                                                                                                                                                                                                                                                                                                                                                                                                                                     |
|               | $D_3^2(7)$  | $*(N1-H2_{(-NH3+)} \cdots O3_{(-COO-)} )_2$ & $C7-H17_{(-CH)} \cdots O3_{(-COO-)}$<br>$*(N1-H3_{(-NH3+)} \cdots O3_{(-COO-)} )$ & $C7-H17_{(-CH)} \cdots O3_{(-COO-)}$<br>$*(N3-H16_{(-NH3+)} \cdots O1_{(-COO-)} )_2$ & $C2-H4_{(-CH)} \cdots O1_{(-COO-)}$ <b>ornithine</b>                                                                                                                                                                                                                                                                                                                                                                                                                                                                                                                                                                                                                                                                                                                                                                                                                                                                                                                                                                                                                                                                                                                                                                            |
|               | $D_3^3(9)$  | $*(N1-H1_{(-NH3+)} \cdots O4_{(-COO-)} )_2$ & $C7-H17_{(-CH)} \cdots O3_{(-COO-)}$<br>$*(N1-H2_{(-NH3+)} \cdots O4_{(-COO-)} )_2$ & $C7-H17_{(-CH)} \cdots O3_{(-COO-)}$                                                                                                                                                                                                                                                                                                                                                                                                                                                                                                                                                                                                                                                                                                                                                                                                                                                                                                                                                                                                                                                                                                                                                                                                                                                                                 |
|               | $D_3^3(11)$ | $*(O7-H20B_{(-OH2)} \cdots O6_{(-COO-)} )_2$ & $N1-H1_{(-NH3+)} \cdots O4_{(-COO-)}$<br>$*(O7-H20B_{(-OH2)} \cdots O6_{(-COO-)} )_2$ & $N1-H2_{(-NH3+)} \cdots O4_{(-COO-)}$<br>$*(O7-H20B_{(-OH2)} \cdots O6_{(-COO-)} )_2$ & $N1-H2_{(-NH3+)} \cdots O3_{(-COO-)}$<br>$*(O7-H20B_{(-OH2)} \cdots O6_{(-COO-)} )_2$ & $N1-H3_{(-NH3+)} \cdots O3_{(-COO-)}$<br>$*(N1-H1_{(-NH3+)} \cdots O4_{(-COO-)} )_2$ & $C2-H4_{(-CH)} \cdots O1_{(-COO-)}$ <b>ornithine</b><br>$*(N1-H2_{(-NH3+)} \cdots O3_{(-COO-)} )_2$ & $C2-H4_{(-CH)} \cdots O1_{(-COO-)}$ <b>ornithine</b><br>$*(N1-H2_{(-NH3+)} \cdots O4_{(-COO-)} )_2$ & $C2-H4_{(-CH)} \cdots O1_{(-COO-)}$ <b>ornithine</b><br>$*(N1-H3_{(-NH3+)} \cdots O3_{(-COO-)} )_2$ & $C2-H4_{(-CH)} \cdots O1_{(-COO-)}$ <b>ornithine</b><br>$*(N2-H11_{(-NH3+)} \cdots O1_{(-COO-)} )$ <b>ornithine</b> & $(N3-H16_{(-NH3+)} \cdots O1_{(-COO-)} )_2$<br>$*(N2-H12_{(-NH3+)} \cdots O6_{(-COO-)} )_2$ & $N3-H14_{(-NH3+)} \cdots O5_{(-COO-)}$<br>$*(N2-H12_{(-NH3+)} \cdots O6_{(-COO-)} )_2$ & $N3-H15_{(-NH3+)} \cdots O5_{(-COO-)}$<br>$*(N3-H14_{(-NH3+)} \cdots O5_{(-COO-)} )$ & $(N3-H16_{(-NH3+)} \cdots O1_{(-COO-)} )_2$<br>$*(N3-H16_{(-NH3+)} \cdots O2_{(-COO-)} )_2$ & $N3-H15_{(-NH3+)} \cdots O5_{(-COO-)}$<br>$*(N3-H16_{(-NH3+)} \cdots O1_{(-COO-)} )_2$ & $C7-H17_{(-CH)} \cdots O3_{(-COO-)}$<br>$*(O7-H20B_{(-OH2)} \cdots O6_{(-COO-)} )_2$ & $N3-H16_{(-NH3+)} \cdots O1_{(-COO-)}$ |
|               | $D_3^3(13)$ | $*(N1-H2_{(-NH3+)} \cdots O3_{(-COO-)} )_2$ & $N3-H14_{(-NH3+)} \cdots O5_{(-COO-)}$<br>$*(N1-H2_{(-NH3+)} \cdots O3_{(-COO-)} )_2$ & $N3-H15_{(-NH3+)} \cdots O5_{(-COO-)}$<br>$*(N1-H1_{(-NH3+)} \cdots O4_{(-COO-)} )_2$ & $N3-H14_{(-NH3+)} \cdots O5_{(-COO-)}$<br>$*(N1-H1_{(-NH3+)} \cdots O4_{(-COO-)} )_2$ & $N3-H15_{(-NH3+)} \cdots O5_{(-COO-)}$<br>$*(N1-H2_{(-NH3+)} \cdots O4_{(-COO-)} )_2$ & $N3-H14_{(-NH3+)} \cdots O5_{(-COO-)}$<br>$*(N1-H2_{(-NH3+)} \cdots O4_{(-COO-)} )_2$ & $N3-H15_{(-NH3+)} \cdots O5_{(-COO-)}$<br>$*(N1-H3_{(-NH3+)} \cdots O3_{(-COO-)} )_2$ & $N3-H14_{(-NH3+)} \cdots O5_{(-COO-)}$<br>$*(N1-H3_{(-NH3+)} \cdots O3_{(-COO-)} )_2$ & $N3-H15_{(-NH3+)} \cdots O5_{(-COO-)}$<br>$*(N2-H11_{(-NH3+)} \cdots O1_{(-COO-)} )$ <b>ornithine</b> & $(N2-H12_{(-NH3+)} \cdots O6_{(-COO-)} )_2$<br>$*(N2-H11_{(-NH3+)} \cdots O2_{(-COO-)} )$ <b>ornithine</b> & $(N2-H12_{(-NH3+)} \cdots O6_{(-COO-)} )_2$<br>$*(N2-H11_{(-NH3+)} \cdots O2_{(-COO-)} )$ <b>ornithine</b> & $(N3-H16_{(-NH3+)} \cdots O1_{(-COO-)} )_2$<br>$*(N2-H13_{(-NH3+)} \cdots O2_{(-COO-)} )$ <b>ornithine</b> & $(N2-H16_{(-NH3+)} \cdots O6_{(-COO-)} )_2$<br>$*(N2-H12_{(-NH3+)} \cdots O6_{(-COO-)} )_2$ & $C7-H17_{(-CH)} \cdots O3_{(-COO-)}$<br>$*(N2-H13_{(-NH3+)} \cdots O2_{(-COO-)} )$ <b>ornithine</b> & $(N3-H16_{(-NH3+)} \cdots O1_{(-COO-)} )_2$                                                                     |
|               | $D_3^3(15)$ | $*(N1-H1_{(-NH3+)} \cdots O4_{(-COO-)} )_2$ & $N2-H11_{(-NH3+)} \cdots O2_{(-COO-)}$ <b>ornithine</b><br>$*(N1-H1_{(-NH3+)} \cdots O4_{(-COO-)} )_2$ & $N2-H13_{(-NH3+)} \cdots O2_{(-COO-)}$ <b>ornithine</b><br>$*(N1-H2_{(-NH3+)} \cdots O3_{(-COO-)} )_2$ & $N2-H11_{(-NH3+)} \cdots O1_{(-COO-)}$ <b>ornithine</b><br>$*(N2-H11_{(-NH3+)} \cdots O2_{(-COO-)} )$ <b>ornithine</b> & $(N1-H2_{(-NH3+)} \cdots O3_{(-COO-)} )_2$<br>$*(N1-H2_{(-NH3+)} \cdots O3_{(-COO-)} )_2$ & $N2-H13_{(-NH3+)} \cdots O2_{(-COO-)}$ <b>ornithine</b><br>$*(N1-H2_{(-NH3+)} \cdots O4_{(-COO-)} )_2$ & $N2-H11_{(-NH3+)} \cdots O1_{(-COO-)}$ <b>ornithine</b><br>$*(N1-H2_{(-NH3+)} \cdots O4_{(-COO-)} )_2$ & $N2-H13_{(-NH3+)} \cdots O2_{(-COO-)}$ <b>ornithine</b><br>$*(N1-H3_{(-NH3+)} \cdots O3_{(-COO-)} )_2$ & $N2-H11_{(-NH3+)} \cdots O1_{(-COO-)}$ <b>ornithine</b><br>$*(N1-H3_{(-NH3+)} \cdots O3_{(-COO-)} )_2$ & $N2-H11_{(-NH3+)} \cdots O2_{(-COO-)}$ <b>ornithine</b><br>$*(N1-H3_{(-NH3+)} \cdots O3_{(-COO-)} )_2$ & $N2-H13_{(-NH3+)} \cdots O2_{(-COO-)}$ <b>ornithine</b>                                                                                                                                                                                                                                                                                                                                                                |
|               | $D_3^3(17)$ | $(N2-H12_{(-NH3+)} \cdots O6_{(-COO-)} )_2$ & $C2-H4 \cdots O1_{(-COO-)}$ <b>ornithine</b>                                                                                                                                                                                                                                                                                                                                                                                                                                                                                                                                                                                                                                                                                                                                                                                                                                                                                                                                                                                                                                                                                                                                                                                                                                                                                                                                                               |
| <b>EVIJAU</b> | $C(5)$      | $N1-H5_{(-NH3+)} \cdots O1_{(-COOH)}$ <b>ornithine</b>                                                                                                                                                                                                                                                                                                                                                                                                                                                                                                                                                                                                                                                                                                                                                                                                                                                                                                                                                                                                                                                                                                                                                                                                                                                                                                                                                                                                   |
|               | $C(8)$      | $N2-H12_{(-NH3+)} \cdots O1_{(-COOH)}$ <b>ornithine</b>                                                                                                                                                                                                                                                                                                                                                                                                                                                                                                                                                                                                                                                                                                                                                                                                                                                                                                                                                                                                                                                                                                                                                                                                                                                                                                                                                                                                  |
|               | $R_2^2(12)$ | $(C4-H9_{(-CH2)} \cdots O2_{(-COOH)})$ <b>ornithine</b> $_2$                                                                                                                                                                                                                                                                                                                                                                                                                                                                                                                                                                                                                                                                                                                                                                                                                                                                                                                                                                                                                                                                                                                                                                                                                                                                                                                                                                                             |
|               | $D(2)$      | $*O2-H1_{(-COOH)} \cdots O6_{(-SO4)}$<br>$*(N1-H3_{(-NH3+)} \cdots C11)$<br>$*(N1-H4_{(-NH3+)} \cdots O5A_{(-SO4)})$<br>$*(N1-H5_{(-NH3+)} \cdots O3_{(-NO3-)})$<br>$*(C3-H6_{(-CH2)} \cdots O4_{(-NO3-)})$<br>$*(N2-H12_{(-NH3+)} \cdots C11)$<br>$*(N2-H13_{(-NH3+)} \cdots O4A_{(-NO3-)})$<br>$*(N2-H14_{(-NH3+)} \cdots O6_{(-SO4)})$<br>$*(N2-H14_{(-NH3+)} \cdots O5A_{(-SO4)})$                                                                                                                                                                                                                                                                                                                                                                                                                                                                                                                                                                                                                                                                                                                                                                                                                                                                                                                                                                                                                                                                   |
|               | $D_1^1(3)$  | $*(N1-H3_{(-NH3+)} \cdots C11)_2$<br>$*(N1-H3_{(-NH3+)} \cdots O3_{(-NO3-)} )_2$<br>$*(N2-H12_{(-NH3+)} \cdots C11)_2$                                                                                                                                                                                                                                                                                                                                                                                                                                                                                                                                                                                                                                                                                                                                                                                                                                                                                                                                                                                                                                                                                                                                                                                                                                                                                                                                   |
|               | $D_2^2(5)$  | $*O2-H1_{(-COOH)} \cdots O6_{(-SO4)}$ & $O2-H1_{(-COOH)} \cdots O6A_{(-SO4)}$<br>$*(N1-H4_{(-NH3+)} \cdots O5A_{(-SO4)})$ & $N1-H4_{(-NH3+)} \cdots O5_{(-SO4)}$<br>$*(C3-H6_{(-CH2)} \cdots O4A_{(-NO3-)})$ & $C3-H6_{(-CH2)} \cdots O4_{(-NO3-)}$<br>$*(N2-H14_{(-NH3+)} \cdots O6_{(-SO4)})$ & $N2-H14_{(-NH3+)} \cdots O6A_{(-SO4)}$<br>$*(N2-H13_{(-NH3+)} \cdots O4A_{(-NO3-)})$ & $N2-H13_{(-NH3+)} \cdots O4_{(-NO3-)}$                                                                                                                                                                                                                                                                                                                                                                                                                                                                                                                                                                                                                                                                                                                                                                                                                                                                                                                                                                                                                          |

|         |                                  |                                                                                                                                                                                                                                                                                                                                                                                                                                                                                                                                                                                                                                                                                                                                                                                                                                                                                                                                                                                                                                                                                      |
|---------|----------------------------------|--------------------------------------------------------------------------------------------------------------------------------------------------------------------------------------------------------------------------------------------------------------------------------------------------------------------------------------------------------------------------------------------------------------------------------------------------------------------------------------------------------------------------------------------------------------------------------------------------------------------------------------------------------------------------------------------------------------------------------------------------------------------------------------------------------------------------------------------------------------------------------------------------------------------------------------------------------------------------------------------------------------------------------------------------------------------------------------|
|         |                                  | *N2-H14 <sub>(-NH3+)</sub> ...O5A <sub>(-SO4)</sub> & N2-H14 <sub>(-NH3+)</sub> ...O5 <sub>(-SO4)</sub>                                                                                                                                                                                                                                                                                                                                                                                                                                                                                                                                                                                                                                                                                                                                                                                                                                                                                                                                                                              |
| level 2 | C <sub>2</sub> <sup>1</sup> (7)  | C3-H6 <sub>(-CH2)</sub> ...O4 <sub>(-NO3-)</sub>                                                                                                                                                                                                                                                                                                                                                                                                                                                                                                                                                                                                                                                                                                                                                                                                                                                                                                                                                                                                                                     |
|         | C <sub>2</sub> <sup>1</sup> (9)  | *N1-H3 <sub>(-NH3+)</sub> ...C11 & N2-H12 <sub>(-NH3+)</sub> ...C11<br>*N1-H4 <sub>(-NH3+)</sub> ...O5A <sub>(-SO4)</sub> & N2-H14 <sub>(-NH3+)</sub> ...O5A <sub>(-SO4)</sub><br>*N1-H5 <sub>(-NH3+)</sub> ...O1 <sub>(-COOH)</sub> ornithine & N2-H12 <sub>(-NH3+)</sub> ...O1 <sub>(-COOH)</sub> ornithine                                                                                                                                                                                                                                                                                                                                                                                                                                                                                                                                                                                                                                                                                                                                                                        |
|         | C <sub>2</sub> <sup>1</sup> (10) | O2-H1 <sub>(-COOH)</sub> ...O6 <sub>(-SO4)</sub> & N2-H14 <sub>(-NH3+)</sub> ...O6 <sub>(-SO4)</sub>                                                                                                                                                                                                                                                                                                                                                                                                                                                                                                                                                                                                                                                                                                                                                                                                                                                                                                                                                                                 |
|         | C <sub>2</sub> <sup>2</sup> (18) | N1-H3 <sub>(-NH3+)</sub> ...C11 & (N2-H12 <sub>(-NH3+)</sub> ...C11) <sub>2</sub>                                                                                                                                                                                                                                                                                                                                                                                                                                                                                                                                                                                                                                                                                                                                                                                                                                                                                                                                                                                                    |
|         | C <sub>2</sub> <sup>2</sup> (7)  | N1-H5 <sub>(-NH3+)</sub> ...O3 <sub>(-NO3-)</sub> & N1-H5 <sub>(-NH3+)</sub> ...O1 <sub>(-COOH)</sub> ornithine                                                                                                                                                                                                                                                                                                                                                                                                                                                                                                                                                                                                                                                                                                                                                                                                                                                                                                                                                                      |
|         | C <sub>2</sub> <sup>2</sup> (8)  | C4-H9 <sub>(-CH2)</sub> ...O2 <sub>(-COOH)</sub> ornithine & N2-H12 <sub>(-NH3+)</sub> ...O1 <sub>(-COOH)</sub> ornithine                                                                                                                                                                                                                                                                                                                                                                                                                                                                                                                                                                                                                                                                                                                                                                                                                                                                                                                                                            |
|         | C <sub>2</sub> <sup>2</sup> (9)  | *O2-H1 <sub>(-COOH)</sub> ...O6 <sub>(-SO4)</sub> & N1-H1 <sub>(-NH3+)</sub> ...O5 <sub>(-SO4)</sub><br>*N1-H5 <sub>(-NH3+)</sub> ...O1 <sub>(-COOH)</sub> ornithine & (N1-H3 <sub>(-NH3+)</sub> ...C11) <sub>2</sub><br>*N1-H5 <sub>(-NH3+)</sub> ...O1 <sub>(-COOH)</sub> ornithine & C4-H9 <sub>(-CH2)</sub> ...O2 <sub>(-COOH)</sub> ornithine<br>*C3-H6 <sub>(-CH2)</sub> ...O4 <sub>(-NO3-)</sub> & N2-H13 <sub>(-NH3+)</sub> ...O4A <sub>(-NO3-)</sub>                                                                                                                                                                                                                                                                                                                                                                                                                                                                                                                                                                                                                        |
|         | C <sub>2</sub> <sup>2</sup> (10) | N2-H12 <sub>(-NH3+)</sub> ...C11 & N2-H12 <sub>(-NH3+)</sub> ...O1 <sub>(-COOH)</sub> ornithine                                                                                                                                                                                                                                                                                                                                                                                                                                                                                                                                                                                                                                                                                                                                                                                                                                                                                                                                                                                      |
|         | C <sub>2</sub> <sup>2</sup> (11) | *N1-H4 <sub>(-NH3+)</sub> ...O5A <sub>(-SO4)</sub> & N2-H14 <sub>(-NH3+)</sub> ...O6 <sub>(-SO4)</sub><br>*N1-H5 <sub>(-NH3+)</sub> ...O1 <sub>(-COOH)</sub> ornithine & C4-H9 <sub>(-CH2)</sub> ...O2 <sub>(-COOH)</sub> ornithine<br>*N1-H5 <sub>(-NH3+)</sub> ...O3 <sub>(-NO3-)</sub> & N2-H13 <sub>(-NH3+)</sub> ...O4 <sub>(-NO3-)</sub>                                                                                                                                                                                                                                                                                                                                                                                                                                                                                                                                                                                                                                                                                                                                       |
|         | C <sub>2</sub> <sup>2</sup> (12) | *O2-H1 <sub>(-COOH)</sub> ...O6 <sub>(-SO4)</sub> & N2-H14 <sub>(-NH3+)</sub> ...O6A <sub>(-SO4)</sub><br>*O2-H1 <sub>(-COOH)</sub> ...O6 <sub>(-SO4)</sub> & N2-H14 <sub>(-NH3+)</sub> ...O5 <sub>(-SO4)</sub>                                                                                                                                                                                                                                                                                                                                                                                                                                                                                                                                                                                                                                                                                                                                                                                                                                                                      |
|         | C <sub>2</sub> <sup>2</sup> (13) | N1-H5 <sub>(-NH3+)</sub> ...O1 <sub>(-COOH)</sub> ornithine & N2-H12 <sub>(-NH3+)</sub> ...O1 <sub>(-COOH)</sub> ornithine                                                                                                                                                                                                                                                                                                                                                                                                                                                                                                                                                                                                                                                                                                                                                                                                                                                                                                                                                           |
|         | C <sub>2</sub> <sup>2</sup> (14) | C4-H9 <sub>(-CH2)</sub> ...O2 <sub>(-COOH)</sub> ornithine & N2-H12 <sub>(-NH3+)</sub> ...O1 <sub>(-COOH)</sub> ornithine                                                                                                                                                                                                                                                                                                                                                                                                                                                                                                                                                                                                                                                                                                                                                                                                                                                                                                                                                            |
|         | C <sub>2</sub> <sup>3</sup> (12) | (N1-H5 <sub>(-NH3+)</sub> ...O3 <sub>(-NO3-)</sub> ) <sub>2</sub> & C4-H9 <sub>(-CH2)</sub> ...O2 <sub>(-COOH)</sub> ornithine                                                                                                                                                                                                                                                                                                                                                                                                                                                                                                                                                                                                                                                                                                                                                                                                                                                                                                                                                       |
|         | C <sub>2</sub> <sup>3</sup> (14) | *(N1-H3 <sub>(-NH3+)</sub> ...C11) <sub>2</sub> & N2-H12 <sub>(-NH3+)</sub> ...O1 <sub>(-COOH)</sub> ornithine<br>*(N1-H5 <sub>(-NH3+)</sub> ...O3 <sub>(-NO3-)</sub> ) <sub>2</sub> & N2-H12 <sub>(-NH3+)</sub> ...O1 <sub>(-COOH)</sub> ornithine<br>*C4-H9 <sub>(-CH2)</sub> ...O2 <sub>(-COOH)</sub> ornithine & (N2-H12 <sub>(-NH3+)</sub> ...C11) <sub>2</sub>                                                                                                                                                                                                                                                                                                                                                                                                                                                                                                                                                                                                                                                                                                                 |
|         | C <sub>2</sub> <sup>3</sup> (17) | N1-H5 <sub>(-NH3+)</sub> ...O1 <sub>(-COOH)</sub> ornithine & (N2-H12 <sub>(-NH3+)</sub> ...C11) <sub>2</sub>                                                                                                                                                                                                                                                                                                                                                                                                                                                                                                                                                                                                                                                                                                                                                                                                                                                                                                                                                                        |
|         | C <sub>2</sub> <sup>4</sup> (18) | *N1-H3 <sub>(-NH3+)</sub> ...C11 & (N2-H12 <sub>(-NH3+)</sub> ...C11) <sub>2</sub><br>*(N1-H5 <sub>(-NH3+)</sub> ...O3 <sub>(-NO3-)</sub> ) <sub>2</sub> & (N2-H12 <sub>(-NH3+)</sub> ...C11) <sub>2</sub>                                                                                                                                                                                                                                                                                                                                                                                                                                                                                                                                                                                                                                                                                                                                                                                                                                                                           |
|         | C <sub>3</sub> <sup>3</sup> (11) | N1-H4 <sub>(-NH3+)</sub> ...O5 <sub>(-SO4)</sub> & N1-H4 <sub>(-NH3+)</sub> ...O5 <sub>(-SO4)</sub> & N1-H5 <sub>(-NH3+)</sub> ...O1 <sub>(-COOH)</sub> ornithine                                                                                                                                                                                                                                                                                                                                                                                                                                                                                                                                                                                                                                                                                                                                                                                                                                                                                                                    |
|         | C <sub>3</sub> <sup>3</sup> (12) | *(N1-H3 <sub>(-NH3+)</sub> ...C11) <sub>2</sub> & C4-H9 <sub>(-CH2)</sub> ...O2 <sub>(-COOH)</sub> ornithine<br>*C3-H6 <sub>(-CH2)</sub> ...O4 <sub>(-NO3-)</sub> & C3-H6 <sub>(-CH2)</sub> ...O4A <sub>(-NO3-)</sub> & C4-H9 <sub>(-CH2)</sub> ...O2 <sub>(-COOH)</sub> ornithine                                                                                                                                                                                                                                                                                                                                                                                                                                                                                                                                                                                                                                                                                                                                                                                                   |
|         | C <sub>3</sub> <sup>3</sup> (13) | *O2-H1 <sub>(-COOH)</sub> ...O6 <sub>(-SO4)</sub> & O2-H1 <sub>(-COOH)</sub> ...O6A <sub>(-SO4)</sub> & N1-H5 <sub>(-NH3+)</sub> ...O1 <sub>(-COOH)</sub> ornithine<br>*N1-H5 <sub>(-NH3+)</sub> ...O1 <sub>(-COOH)</sub> ornithine & C3-H6 <sub>(-CH2)</sub> ...O4A <sub>(-NO3-)</sub> & C3-H6 <sub>(-CH2)</sub> ...O4 <sub>(-NO3-)</sub>                                                                                                                                                                                                                                                                                                                                                                                                                                                                                                                                                                                                                                                                                                                                           |
|         | C <sub>3</sub> <sup>3</sup> (14) | *N1-H4 <sub>(-NH3+)</sub> ...O5 <sub>(-SO4)</sub> & N1-H4 <sub>(-NH3+)</sub> ...O5A <sub>(-SO4)</sub> & C4-H9 <sub>(-CH2)</sub> ...O2 <sub>(-COOH)</sub> ornithine<br>*N2-H12 <sub>(-NH3+)</sub> ...O1 <sub>(-COOH)</sub> ornithine & C3-H6 <sub>(-CH2)</sub> ...O4 <sub>(-NO3-)</sub> & C3-H6 <sub>(-CH2)</sub> ...O4A <sub>(-NO3-)</sub><br>*N2-H13 <sub>(-NH3+)</sub> ...O4 <sub>(-NO3-)</sub> ornithine & N2-H13 <sub>(-NH3+)</sub> ...O4A <sub>(-NO3-)</sub> & N2-H12 <sub>(-NH3+)</sub> ...O1 <sub>(-COOH)</sub> ornithine<br>*N2-H14 <sub>(-NH3+)</sub> ...O6 <sub>(-SO4)</sub> & N2-H14 <sub>(-NH3+)</sub> ...O6A <sub>(-SO4)</sub> & N2-H12 <sub>(-NH3+)</sub> ...O1 <sub>(-COOH)</sub> ornithine                                                                                                                                                                                                                                                                                                                                                                           |
|         | C <sub>3</sub> <sup>3</sup> (16) | *O2-H1 <sub>(-COOH)</sub> ...O6 <sub>(-SO4)</sub> & O2-H1 <sub>(-COOH)</sub> ...O6A <sub>(-SO4)</sub> & N2-H12 <sub>(-NH3+)</sub> ...O1 <sub>(-COOH)</sub> ornithine<br>*N1-H4 <sub>(-NH3+)</sub> ...O5 <sub>(-SO4)</sub> & N1-H4 <sub>(-NH3+)</sub> ...O5A <sub>(-SO4)</sub> & N2-H12 <sub>(-NH3+)</sub> ...O1 <sub>(-COOH)</sub> ornithine<br>*N2-H13 <sub>(-NH3+)</sub> ...O4 <sub>(-NO3-)</sub> & N2-H13 <sub>(-NH3+)</sub> ...O4A <sub>(-NO3-)</sub> & C4-H9 <sub>(-CH2)</sub> ...O2 <sub>(-COOH)</sub> ornithine<br>*N2-H14 <sub>(-NH3+)</sub> ...O6 <sub>(-SO4)</sub> & N2-H14 <sub>(-NH3+)</sub> ...O6A <sub>(-SO4)</sub> & C4-H9 <sub>(-CH2)</sub> ...O2 <sub>(-COOH)</sub> ornithine<br>*N2-H14 <sub>(-NH3+)</sub> ...O5 <sub>(-SO4)</sub> & N2-H14 <sub>(-NH3+)</sub> ...O5A <sub>(-SO4)</sub> & C4-H9 <sub>(-CH2)</sub> ...O2 <sub>(-COOH)</sub> ornithine                                                                                                                                                                                                               |
|         | C <sub>3</sub> <sup>3</sup> (19) | *N1-H5 <sub>(-NH3+)</sub> ...O1 <sub>(-COOH)</sub> ornithine & N2-H13 <sub>(-NH3+)</sub> ...O4 <sub>(-NO3-)</sub> & N2-H13 <sub>(-NH3+)</sub> ...O4A <sub>(-NO3-)</sub><br>*N1-H5 <sub>(-NH3+)</sub> ...O1 <sub>(-COOH)</sub> ornithine & N2-H14 <sub>(-NH3+)</sub> ...O6 <sub>(-SO4)</sub> & N2-H14 <sub>(-NH3+)</sub> ...O6A <sub>(-SO4)</sub><br>*N2-H14 <sub>(-NH3+)</sub> ...O5 <sub>(-SO4)</sub> & N1-H5 <sub>(-NH3+)</sub> ...O1 <sub>(-COOH)</sub> ornithine & N2-H14 <sub>(-NH3+)</sub> ...O5A <sub>(-SO4)</sub>                                                                                                                                                                                                                                                                                                                                                                                                                                                                                                                                                            |
|         | C <sub>3</sub> <sup>4</sup> (10) | *(N1-H3 <sub>(-NH3+)</sub> ...C11) <sub>2</sub> & N1-H4 <sub>(-NH3+)</sub> ...O5 <sub>(-SO4)</sub> & N1-H4 <sub>(-NH3+)</sub> ...O5A <sub>(-SO4)</sub><br>*(N1-H5 <sub>(-NH3+)</sub> ...O3 <sub>(-NO3-)</sub> ) <sub>2</sub> & N1-H4 <sub>(-NH3+)</sub> ...O5 <sub>(-SO4)</sub> & N1-H4 <sub>(-NH3+)</sub> ...O5A <sub>(-SO4)</sub><br>*(N2-H12 <sub>(-NH3+)</sub> ...C11) <sub>2</sub> & N2-H14 <sub>(-NH3+)</sub> ...O6 <sub>(-SO4)</sub> & N2-H14 <sub>(-NH3+)</sub> ...O6A <sub>(-SO4)</sub><br>*(N2-H12 <sub>(-NH3+)</sub> ...C11) <sub>2</sub> & N2-H14 <sub>(-NH3+)</sub> ...O5 <sub>(-SO4)</sub>                                                                                                                                                                                                                                                                                                                                                                                                                                                                             |
|         | C <sub>3</sub> <sup>4</sup> (16) | *O2-H1 <sub>(-COOH)</sub> ...O6A <sub>(-SO4)</sub> & (O2-H1 <sub>(-COOH)</sub> ...O6 <sub>(-SO4)</sub> ) <sub>2</sub> & (N1-H3 <sub>(-NH3+)</sub> ...C11) <sub>2</sub><br>*O2-H1 <sub>(-COOH)</sub> ...O6 <sub>(-SO4)</sub> & O2-H1 <sub>(-COOH)</sub> ...O6A <sub>(-SO4)</sub> & (N1-H5 <sub>(-NH3+)</sub> ...O3 <sub>(-NO3-)</sub> ) <sub>2</sub><br>*C3-H6 <sub>(-CH2)</sub> ...O4 <sub>(-NO3-)</sub> & C3-H6 <sub>(-CH2)</sub> ...O4A <sub>(-NO3-)</sub> & (N2-H12 <sub>(-NH3+)</sub> ...C11) <sub>2</sub>                                                                                                                                                                                                                                                                                                                                                                                                                                                                                                                                                                       |
|         | C <sub>3</sub> <sup>4</sup> (20) | *(N1-H3 <sub>(-NH3+)</sub> ...C11) <sub>2</sub> & N2-H13 <sub>(-NH3+)</sub> ...O4 <sub>(-NO3-)</sub><br>*N2-H14 <sub>(-NH3+)</sub> ...O6 <sub>(-SO4)</sub> & N2-H14 <sub>(-NH3+)</sub> ...O6A <sub>(-SO4)</sub> & (N1-H3 <sub>(-NH3+)</sub> ...C11) <sub>2</sub><br>*N1-H4 <sub>(-NH3+)</sub> ...O5 <sub>(-SO4)</sub> & N1-H4 <sub>(-NH3+)</sub> ...O5A <sub>(-SO4)</sub> & (N2-H12 <sub>(-NH3+)</sub> ...C11) <sub>2</sub><br>*(N1-H5 <sub>(-NH3+)</sub> ...O3 <sub>(-NO3-)</sub> ) <sub>2</sub> & N2-H13 <sub>(-NH3+)</sub> ...O4 <sub>(-NO3-)</sub> & N2-H13 <sub>(-NH3+)</sub> ...O4A <sub>(-NO3-)</sub><br>*N2-H14 <sub>(-NH3+)</sub> ...O5 <sub>(-SO4)</sub> & N2-H14 <sub>(-NH3+)</sub> ...O5A <sub>(-SO4)</sub> & (N1-H5 <sub>(-NH3+)</sub> ...O3 <sub>(-NO3-)</sub> ) <sub>2</sub>                                                                                                                                                                                                                                                                                          |
|         | C <sub>4</sub> <sup>4</sup> (12) | N2-H13 <sub>(-NH3+)</sub> ...O4 <sub>(-NO3-)</sub> & N2-H13 <sub>(-NH3+)</sub> ...O4A <sub>(-NO3-)</sub> & N2-H14 <sub>(-NH3+)</sub> ...O6 <sub>(-SO4)</sub> & N2-H14 <sub>(-NH3+)</sub> ...O6A <sub>(-SO4)</sub>                                                                                                                                                                                                                                                                                                                                                                                                                                                                                                                                                                                                                                                                                                                                                                                                                                                                    |
|         | C <sub>4</sub> <sup>4</sup> (16) | *N1-H4 <sub>(-NH3+)</sub> ...O5A <sub>(-SO4)</sub> & N1-H4 <sub>(-NH3+)</sub> ...O5 <sub>(-SO4)</sub> & C3-H6 <sub>(-CH2)</sub> ...O4 <sub>(-NO3-)</sub> & C3-H6 <sub>(-CH2)</sub> ...O4A <sub>(-NO3-)</sub><br>*N1-H5 <sub>(-NH3+)</sub> ...O1 <sub>(-COOH)</sub> ornithine) <sub>2</sub> & C4-H9 <sub>(-CH2)</sub> ...O2 <sub>(-COOH)</sub> ornithine                                                                                                                                                                                                                                                                                                                                                                                                                                                                                                                                                                                                                                                                                                                              |
|         | C <sub>4</sub> <sup>4</sup> (18) | *N1-H4 <sub>(-NH3+)</sub> ...O5 <sub>(-SO4)</sub> & O2-H1 <sub>(-COOH)</sub> ...O6 <sub>(-SO4)</sub> & O2-H1 <sub>(-COOH)</sub> ...O6A <sub>(-SO4)</sub> & N1-H4 <sub>(-NH3+)</sub> ...O5A <sub>(-SO4)</sub><br>*O2-H1 <sub>(-COOH)</sub> ...O6 <sub>(-SO4)</sub> & O2-H1 <sub>(-COOH)</sub> ...O6A <sub>(-SO4)</sub> & C3-H6 <sub>(-CH2)</sub> ...O4A <sub>(-NO3-)</sub> & C3-H6 <sub>(-CH2)</sub> ...O4 <sub>(-NO3-)</sub><br>*C3-H6 <sub>(-CH2)</sub> ...O4 <sub>(-NO3-)</sub> & C3-H6 <sub>(-CH2)</sub> ...O4A <sub>(-NO3-)</sub> & N2-H13 <sub>(-NH3+)</sub> ...O4 <sub>(-NO3-)</sub> & N2-H13 <sub>(-NH3+)</sub> ...O4A <sub>(-NO3-)</sub><br>*C3-H6 <sub>(-CH2)</sub> ...O4 <sub>(-NO3-)</sub> & N2-H14 <sub>(-NH3+)</sub> ...O6A <sub>(-SO4)</sub> & C3-H6 <sub>(-CH2)</sub> ...O4A <sub>(-NO3-)</sub> & N2-H14 <sub>(-NH3+)</sub> ...O6 <sub>(-SO4)</sub><br>*C3-H6 <sub>(-CH2)</sub> ...O4 <sub>(-NO3-)</sub> & C3-H6 <sub>(-CH2)</sub> ...O4A <sub>(-NO3-)</sub> & N2-H14 <sub>(-NH3+)</sub> ...O5 <sub>(-SO4)</sub> & N2-H14 <sub>(-NH3+)</sub> ...O5A <sub>(-SO4)</sub> |



|             |                                                                                                                                                                                                                                                                                                                                                                                                                                                                                                                                                                                                                                                                      |
|-------------|----------------------------------------------------------------------------------------------------------------------------------------------------------------------------------------------------------------------------------------------------------------------------------------------------------------------------------------------------------------------------------------------------------------------------------------------------------------------------------------------------------------------------------------------------------------------------------------------------------------------------------------------------------------------|
| $C_4^4(20)$ | $(N1-H5_{(-NH3+)} \cdots O1_{(-COOH)} \text{ ornithine})_2$ & $C4-H9_{(-CH2)} \cdots O2_{(-COOH)} \text{ ornithine}$                                                                                                                                                                                                                                                                                                                                                                                                                                                                                                                                                 |
| $R_1^2(4)$  | $N2-H14_{(-NH3+)} \cdots O6_{(-SO4)}$ & $N2-H14_{(-NH3+)} \cdots O5A_{(-SO4)}$                                                                                                                                                                                                                                                                                                                                                                                                                                                                                                                                                                                       |
| $R_2^2(8)$  | $N1-H5_{(-NH3+)} \cdots O3_{(-NO3-)}$ & $C3-H6_{(-CH2)} \cdots O4_{(-NO3-)}$                                                                                                                                                                                                                                                                                                                                                                                                                                                                                                                                                                                         |
| $R_4^2(8)$  | $(N1-H5_{(-NH3+)} \cdots O3_{(-NO3-)})_2$ & $(N1-H3_{(-NH3+)} \cdots C11)_2$                                                                                                                                                                                                                                                                                                                                                                                                                                                                                                                                                                                         |
| $R_3^3(12)$ | $O2-H1_{(-COOH)} \cdots O6_{(-SO4)}$ & $O2-H1_{(-COOH)} \cdots O6A_{(-SO4)}$ & $C4-H9_{(-CH2)} \cdots O2_{(-COOH)} \text{ ornithine}$                                                                                                                                                                                                                                                                                                                                                                                                                                                                                                                                |
| $R_3^3(14)$ | $(N1-H3_{(-NH3+)} \cdots C11)_2$ & $C3-H6_{(-CH2)} \cdots O4_{(-NO3-)}$ & $C3-H6_{(-CH2)} \cdots O4A_{(-NO3-)}$                                                                                                                                                                                                                                                                                                                                                                                                                                                                                                                                                      |
| $R_4^3(10)$ | $(N2-H12_{(-NH3+)} \cdots C11)_2$ & $N2-H13_{(-NH3+)} \cdots O4_{(-NO3-)}$ & $N2-H13_{(-NH3+)} \cdots O4A_{(-NO3-)}$                                                                                                                                                                                                                                                                                                                                                                                                                                                                                                                                                 |
| $D_1^1(10)$ | $N1-H4_{(-NH3+)} \cdots O5A_{(-SO4)}$ & $N2-H13_{(-NH3+)} \cdots O4A_{(-NO3-)}$                                                                                                                                                                                                                                                                                                                                                                                                                                                                                                                                                                                      |
| $D_2^2(5)$  | * $N1-H3_{(-NH3+)} \cdots C11$ & $N1-H4_{(-NH3+)} \cdots O5A_{(-SO4)}$<br>* $N1-H5_{(-NH3+)} \cdots O3_{(-NO3-)}$ & $N1-H3_{(-NH3+)} \cdots C11$<br>*( $N2-H12_{(-NH3+)} \cdots C11$ & $N2-H14_{(-NH3+)} \cdots O6_{(-SO4)}$ )<br>*( $N2-H12_{(-NH3+)} \cdots C11$ ) <sub>2</sub> & $N2-H14_{(-NH3+)} \cdots O5A_{(-SO4)}$<br>* $N2-H13_{(-NH3+)} \cdots O4A_{(-NO3-)}$ & $N2-H14_{(-NH3+)} \cdots O6_{(-SO4)}$                                                                                                                                                                                                                                                      |
| $D_2^2(7)$  | * $N1-H3_{(-NH3+)} \cdots C11$ & $C3-H6_{(-CH2)} \cdots O4_{(-NO3-)}$<br>* $N1-H4_{(-NH3+)} \cdots O5A_{(-SO4)}$ & $C3-H6_{(-CH2)} \cdots O4_{(-NO3-)}$                                                                                                                                                                                                                                                                                                                                                                                                                                                                                                              |
| $D_2^2(5)$  | $N2-H12_{(-NH3+)} \cdots C11$ & $N2-H13_{(-NH3+)} \cdots O4A_{(-NO3-)}$                                                                                                                                                                                                                                                                                                                                                                                                                                                                                                                                                                                              |
| $D_2^2(8)$  | * $O2-H1_{(-COOH)} \cdots O6_{(-SO4)}$ & $N1-H3_{(-NH3+)} \cdots C11$<br>* $O2-H1_{(-COOH)} \cdots O6_{(-SO4)}$ & $N1-H5_{(-NH3+)} \cdots O3_{(-NO3-)}$<br>* $O2-H1_{(-COOH)} \cdots O6_{(-SO4)}$ & $C3-H6_{(-CH2)} \cdots O4_{(-NO3-)}$<br>* $N2-H12_{(-NH3+)} \cdots C11$ & $C3-H6_{(-CH2)} \cdots O4_{(-NO3-)}$<br>* $C3-H6_{(-CH2)} \cdots O4_{(-NO3-)}$ & $N2-H14_{(-NH3+)} \cdots O6_{(-SO4)}$<br>* $N2-H14_{(-NH3+)} \cdots O5A_{(-SO4)}$ & $C3-H6_{(-CH2)} \cdots O4_{(-NO3-)}$                                                                                                                                                                              |
| $D_2^2(10)$ | * $N1-H3_{(-NH3+)} \cdots C11$ & $N1-H13_{(-NH3+)} \cdots O4A_{(-NO3-)}$<br>* $N1-H3_{(-NH3+)} \cdots C11$ & $N2-H14_{(-NH3+)} \cdots O6_{(-SO4)}$<br>* $N2-H14_{(-NH3+)} \cdots O5A_{(-SO4)}$ & $N1-H3_{(-NH3+)} \cdots C11$<br>* $N1-H4_{(-NH3+)} \cdots O5A_{(-SO4)}$ & $N2-H12_{(-NH3+)} \cdots C11$<br>* $N1-H5_{(-NH3+)} \cdots O3_{(-NO3-)}$ & $N2-H12_{(-NH3+)} \cdots C11$<br>* $N1-H5_{(-NH3+)} \cdots O3_{(-NO3-)}$ & $N2-H14_{(-NH3+)} \cdots O6_{(-SO4)}$<br>*( $N1-H5_{(-NH3+)} \cdots O3_{(-NO3-)}$ ) <sub>2</sub> & $N2-H14_{(-NH3+)} \cdots O5A_{(-SO4)}$                                                                                           |
| $D_2^2(11)$ | * $O2-H1_{(-COOH)} \cdots O6_{(-SO4)}$ & $N2-H12_{(-NH3+)} \cdots C11$<br>* $O2-H1_{(-COOH)} \cdots O6_{(-SO4)}$ & $N2-H13_{(-NH3+)} \cdots O4A_{(-NO3-)}$<br>* $C3-H6_{(-CH2)} \cdots O4_{(-NO3-)}$ & $C3-H6_{(-CH2)} \cdots O4A_{(-NO3-)}$ & $N2-H14_{(-NH3+)} \cdots O5_{(-SO4)}$<br>* $N2-H14_{(-NH3+)} \cdots O5A_{(-SO4)}$ & $C3-H6_{(-CH2)} \cdots O4A_{(-NO3-)}$ & $N2-H14_{(-NH3+)} \cdots O5_{(-SO4)}$                                                                                                                                                                                                                                                     |
| $D_3^2(6)$  | * $N1-H4_{(-NH3+)} \cdots O5_{(-SO4)}$ & $(N1-H3_{(-NH3+)} \cdots C11)_2$<br>* $N1-H5_{(-NH3+)} \cdots O3_{(-NO3-)}$ & $(N1-H3_{(-NH3+)} \cdots C11)_2$<br>* $N1-H5_{(-NH3+)} \cdots O3_{(-NO3-)}$ & $(N1-H3_{(-NH3+)} \cdots C11)_2$<br>* $N1-H4_{(-NH3+)} \cdots O5_{(-SO4)}$ & $N1-H5_{(-NH3+)} \cdots O1_{(-COOH)} \text{ ornithine}$ & $(N1-H5_{(-NH3+)} \cdots O3_{(-NO3-)})_2$<br>*( $N2-H12_{(-NH3+)} \cdots C11$ ) <sub>2</sub> & $N2-H14_{(-NH3+)} \cdots O6A_{(-SO4)}$<br>*( $N2-H12_{(-NH3+)} \cdots C11$ ) <sub>2</sub> & $N2-H14_{(-NH3+)} \cdots O5_{(-SO4)}$                                                                                         |
| $D_3^2(8)$  | * $(N1-H3_{(-NH3+)} \cdots C11)_2$ & $C3-H6_{(-CH2)} \cdots O4A_{(-NO3-)}$<br>* $N2-H12_{(-NH3+)} \cdots C11$ & $N2-H13_{(-NH3+)} \cdots O4_{(-NO3-)}$ & $N2-H13_{(-NH3+)} \cdots O4A_{(-NO3-)}$                                                                                                                                                                                                                                                                                                                                                                                                                                                                     |
| $D_3^2(9)$  | * $O2-H1_{(-COOH)} \cdots O6A_{(-SO4)}$ & $(N1-H3_{(-NH3+)} \cdots C11)_2$<br>*( $N2-H12_{(-NH3+)} \cdots C11$ ) <sub>2</sub> & $C3-H6_{(-CH2)} \cdots O4A_{(-NO3-)}$                                                                                                                                                                                                                                                                                                                                                                                                                                                                                                |
| $D_3^2(11)$ | * $N2-H14_{(-NH3+)} \cdots O6A_{(-SO4)}$ & $(N1-H3_{(-NH3+)} \cdots C11)_2$<br>* $N2-H14_{(-NH3+)} \cdots O5_{(-SO4)}$ & $(N1-H3_{(-NH3+)} \cdots C11)_2$<br>* $N1-H4_{(-NH3+)} \cdots O5_{(-SO4)}$ & $(N2-H12_{(-NH3+)} \cdots C11)_2$<br>*( $N1-H5_{(-NH3+)} \cdots O3_{(-NO3-)}$ ) <sub>2</sub> & $N2-H12_{(-NH3+)} \cdots C11$<br>*( $N1-H5_{(-NH3+)} \cdots O3_{(-NO3-)}$ ) <sub>2</sub> & $N2-H14_{(-NH3+)} \cdots O6A_{(-SO4)}$<br>*( $N1-H5_{(-NH3+)} \cdots O3_{(-NO3-)}$ ) <sub>2</sub> & $N2-H14_{(-NH3+)} \cdots O5_{(-SO4)}$                                                                                                                            |
| $D_3^2(12)$ | $O2-H1_{(-COOH)} \cdots O6_{(-SO4)}$ & $(N2-H12_{(-NH3+)} \cdots C11)_2$                                                                                                                                                                                                                                                                                                                                                                                                                                                                                                                                                                                             |
| $D_3^2(14)$ | $O2-H1_{(-COOH)} \cdots O6_{(-SO4)}$ & $O2-H1_{(-COOH)} \cdots O6A_{(-SO4)}$ & $(N2-H12_{(-NH3+)} \cdots C11)_2$                                                                                                                                                                                                                                                                                                                                                                                                                                                                                                                                                     |
| $D_3^3(8)$  | * $N1-H4_{(-NH3+)} \cdots O5_{(-SO4)}$ & $N1-H4_{(-NH3+)} \cdots O5A_{(-SO4)}$ & $N1-H3_{(-NH3+)} \cdots C11$<br>*( $N1-H5_{(-NH3+)} \cdots O3_{(-NO3-)}$ ) <sub>2</sub> & $N1-H4_{(-NH3+)} \cdots O5_{(-SO4)}$ & $(N1-H4_{(-NH3+)} \cdots O5_{(-SO4)})_2$<br>*( $N2-H12_{(-NH3+)} \cdots C11$ ) <sub>2</sub> & $N2-H14_{(-NH3+)} \cdots O6A_{(-SO4)}$<br>* $N2-H14_{(-NH3+)} \cdots O5_{(-SO4)}$ & $N2-H14_{(-NH3+)} \cdots O5A_{(-SO4)}$ & $N2-H12_{(-NH3+)} \cdots C11$<br>* $N2-H13_{(-NH3+)} \cdots O4_{(-NO3-)}$ & $N2-H13_{(-NH3+)} \cdots O4A_{(-NO3-)}$ & $N2-H14_{(-NH3+)} \cdots O6A_{(-SO4)}$                                                            |
| $D_3^3(10)$ | * $C3-H6_{(-CH2)} \cdots O4_{(-NO3-)}$ & $C3-H6_{(-CH2)} \cdots O4A_{(-NO3-)}$ & $N1-H3_{(-NH3+)} \cdots C11$<br>* $N1-H4_{(-NH3+)} \cdots O5_{(-SO4)}$ & $C3-H6_{(-CH2)} \cdots O4A_{(-NO3-)}$ & $N1-H4_{(-NH3+)} \cdots O5A_{(-SO4)}$<br>* $N1-H4_{(-NH3+)} \cdots O5_{(-SO4)}$ & $C3-H6_{(-CH2)} \cdots O4_{(-NO3-)}$ & $C3-H6_{(-CH2)} \cdots O4A_{(-NO3-)}$                                                                                                                                                                                                                                                                                                     |
| $D_3^3(11)$ | * $(O2-H1_{(-COOH)} \cdots O6_{(-SO4)})_2$ & $N1-H3_{(-NH3+)} \cdots C11$<br>* $O2-H1_{(-COOH)} \cdots O6_{(-SO4)}$ & $O2-H1_{(-COOH)} \cdots O6A_{(-SO4)}$ & $N1-H5_{(-NH3+)} \cdots O3_{(-NO3-)}$<br>* $O2-H1_{(-COOH)} \cdots O6_{(-SO4)}$ & $O2-H1_{(-COOH)} \cdots O6A_{(-SO4)}$ & $C3-H6_{(-CH2)} \cdots O4A_{(-NO3-)}$<br>* $O2-H1_{(-COOH)} \cdots O6A_{(-SO4)}$ & $C3-H6_{(-CH2)} \cdots O4_{(-NO3-)}$ & $C3-H6_{(-CH2)} \cdots O4A_{(-NO3-)}$<br>*( $N1-H3_{(-NH3+)} \cdots C11$ ) <sub>2</sub> & $N2-H13_{(-NH3+)} \cdots O4_{(-NO3-)}$<br>* $C3-H6_{(-CH2)} \cdots O4_{(-NO3-)}$ & $C3-H6_{(-CH2)} \cdots O4A_{(-NO3-)}$ & $N2-H12_{(-NH3+)} \cdots C11$ |

|               |             |                                                                                                                                                                                                                                                                                                                                                                                                                                                                                                                                                                                                                                                                                                                                                                                                                                                                                                                                                                                                                                                                                                 |
|---------------|-------------|-------------------------------------------------------------------------------------------------------------------------------------------------------------------------------------------------------------------------------------------------------------------------------------------------------------------------------------------------------------------------------------------------------------------------------------------------------------------------------------------------------------------------------------------------------------------------------------------------------------------------------------------------------------------------------------------------------------------------------------------------------------------------------------------------------------------------------------------------------------------------------------------------------------------------------------------------------------------------------------------------------------------------------------------------------------------------------------------------|
|               |             | *C3-H16 <sub>(-CH2)</sub> ···O4 <sub>(-NO3-)</sub> & C3-H6 <sub>(-CH2)</sub> ···O4A <sub>(-NO3-)&amp;</sub> N2-H14 <sub>(-NH3+)</sub> ···O6A <sub>(-SO4)</sub><br>*N2-H14 <sub>(-NH3+)</sub> ···O6 <sub>(-SO4)</sub> & N2-H14 <sub>(-NH3+)</sub> ···O6A <sub>(-SO4)</sub> & C3-H6 <sub>(-CH2)</sub> ···O4A <sub>(-NO3-)</sub>                                                                                                                                                                                                                                                                                                                                                                                                                                                                                                                                                                                                                                                                                                                                                                   |
|               | $D_3^3(13)$ | *N1-H3 <sub>(-NH3+)</sub> ···C11 & N2-H13 <sub>(-NH3+)</sub> ···O4 <sub>(-NO3-)</sub> & N2-H13 <sub>(-NH3+)</sub> ···O4A <sub>(-NO3-)</sub><br>*N2-H14 <sub>(-NH3+)</sub> ···O6 <sub>(-SO4)</sub> & N2-H14 <sub>(-NH3+)</sub> ···O6A <sub>(-SO4)</sub> & N1-H3 <sub>(-NH3+)</sub> ···C11<br>*N1-H4 <sub>(-NH3+)</sub> ···O5 <sub>(-SO4)</sub> & N1-H4 <sub>(-NH3+)</sub> ···O5A <sub>(-SO4)</sub> & N2-H12 <sub>(-NH3+)</sub> ···C11<br>*N1-H4 <sub>(-NH3+)</sub> ···O5 <sub>(-SO4)</sub> & N1-H4 <sub>(-NH3+)</sub> ···O5A <sub>(-SO4)</sub> & N2-H13 <sub>(-NH3+)</sub> ···O4 <sub>(-NO3-)</sub><br>*N1-H4 <sub>(-NH3+)</sub> ···O5 <sub>(-SO4)</sub> & N2-H13 <sub>(-NH3+)</sub> ···O4 <sub>(-NO3-)</sub> & N2-H13 <sub>(-NH3+)</sub> ···O4 <sub>(-NO3-)</sub><br>*N1-H5 <sub>(-NH3+)</sub> ···O3 <sub>(-NO3-)</sub> & N2-H14 <sub>(-NH3+)</sub> ···O6 <sub>(-SO4)</sub> & N2-H14 <sub>(-NH3+)</sub> ···O6A <sub>(-SO4)</sub><br>*N1-H5 <sub>(-NH3+)</sub> ···O3 <sub>(-NO3-)</sub> & N2-H14 <sub>(-NH3+)</sub> ···O5 <sub>(-SO4)</sub> & N2-H14 <sub>(-NH3+)</sub> ···O5A <sub>(-SO4)</sub> |
|               | $D_3^3(14)$ | *O2-H1 <sub>(-COOH)</sub> ···O6 <sub>(-SO4)</sub> & O2-H1 <sub>(-COOH)</sub> ···O6A <sub>(-SO4)</sub> & N2-H13 <sub>(-NH3+)</sub> ···O4 <sub>(-NO3-)</sub><br>*O2-H1 <sub>(-COOH)</sub> ···O6A <sub>(-SO4)</sub> & N2-H13 <sub>(-NH3+)</sub> ···O4 <sub>(-NO3-)</sub> & N2-H13 <sub>(-NH3+)</sub> ···O4A <sub>(-NO3-)</sub>                                                                                                                                                                                                                                                                                                                                                                                                                                                                                                                                                                                                                                                                                                                                                                     |
| <b>GOTFAY</b> | $C(7)$      | C12-H3 <sub>(-CHarom.)</sub> ···O11 <sub>(-NO2)</sub>                                                                                                                                                                                                                                                                                                                                                                                                                                                                                                                                                                                                                                                                                                                                                                                                                                                                                                                                                                                                                                           |
|               | $C_2^1(7)$  | *O16-H17 <sub>(-COOH)</sub> ···O10 <sub>(-NO2)</sub> & C15-H5 <sub>(-CH2)</sub> ···O10 <sub>(-NO2)</sub><br>*N8-H10 <sub>(-NH3+)</sub> ···O8 <sub>(-C=O)</sub> & C15-H5 <sub>(-CH2)</sub> ···O8 <sub>(-C=O)</sub>                                                                                                                                                                                                                                                                                                                                                                                                                                                                                                                                                                                                                                                                                                                                                                                                                                                                               |
|               | $C_2^1(9)$  | *N7-H8 <sub>(-NH3+)</sub> ···O3 <sub>(-NO2)</sub> & N8-H18 <sub>(-NH3+)</sub> ···O3 <sub>(-NO2)</sub><br>*N7-H16 <sub>(-NH3+)</sub> ···O8 <sub>(-C=O)</sub> & N8-H10 <sub>(-NH3+)</sub> ···O8 <sub>(-C=O)</sub>                                                                                                                                                                                                                                                                                                                                                                                                                                                                                                                                                                                                                                                                                                                                                                                                                                                                                 |
|               | $C_2^2(7)$  | C13-H7 <sub>(-CH)</sub> ···O12 <sub>(-NO2)</sub> & C15-H6 <sub>(-CH2)</sub> ···O14 <sub>(-NO2)</sub>                                                                                                                                                                                                                                                                                                                                                                                                                                                                                                                                                                                                                                                                                                                                                                                                                                                                                                                                                                                            |
|               | $C_2^2(8)$  | *N7-H8 <sub>(-NH3+)</sub> ···O1 <sub>(-C=O)</sub> & N7-H15 <sub>(-NH3+)</sub> ···O4 <sub>(-NO2)</sub><br>*N8-H13 <sub>(-NH3+)</sub> ···O1 <sub>(-C=O)</sub> & N8-H18 <sub>(-NH3+)</sub> ···O3 <sub>(-NO2)</sub>                                                                                                                                                                                                                                                                                                                                                                                                                                                                                                                                                                                                                                                                                                                                                                                                                                                                                 |
|               | $C_2^2(10)$ | N7-H8 <sub>(-NH3+)</sub> ···O3 <sub>(-NO2)</sub> & N7-H15 <sub>(-NH3+)</sub> ···O4 <sub>(-NO2)</sub>                                                                                                                                                                                                                                                                                                                                                                                                                                                                                                                                                                                                                                                                                                                                                                                                                                                                                                                                                                                            |
|               | $C_2^2(11)$ | *O16-H17 <sub>(-COOH)</sub> ···O10 <sub>(-NO2)</sub> & N7-H16 <sub>(-NH3+)</sub> ···O8 <sub>(-C=O)</sub><br>*O16-H17 <sub>(-COOH)</sub> ···O10 <sub>(-NO2)</sub> & C15-H5 <sub>(-CH2)</sub> ···O8 <sub>(-C=O)</sub><br>*N7-H16 <sub>(-NH3+)</sub> ···O8 <sub>(-C=O)</sub> & C13-H7 <sub>(-CH)</sub> ···O12 <sub>(-NO2)</sub><br>*N8-H10 <sub>(-NH3+)</sub> ···O8 <sub>(-C=O)</sub> & C15-H5 <sub>(-CH2)</sub> ···O10 <sub>(-NO2)</sub>                                                                                                                                                                                                                                                                                                                                                                                                                                                                                                                                                                                                                                                          |
|               | $C_2^2(12)$ | *O16-H17 <sub>(-COOH)</sub> ···O10 <sub>(-NO2)</sub> & C13-H7 <sub>(-CH)</sub> ···O12 <sub>(-NO2)</sub><br>*N7-H16 <sub>(-NH3+)</sub> ···O8 <sub>(-C=O)</sub> & C15-H6 <sub>(-CH2)</sub> ···O14 <sub>(-NO2)</sub>                                                                                                                                                                                                                                                                                                                                                                                                                                                                                                                                                                                                                                                                                                                                                                                                                                                                               |
|               | $C_2^2(13)$ | *O16-H17 <sub>(-COOH)</sub> ···O10 <sub>(-NO2)</sub> & N7-H16 <sub>(-NH3+)</sub> ···O11 <sub>(-NO2)</sub><br>*O16-H17 <sub>(-COOH)</sub> ···O10 <sub>(-NO2)</sub> & C15-H6 <sub>(-CH2)</sub> ···O14 <sub>(-NO2)</sub><br>*N7-H8 <sub>(-NH3+)</sub> ···O1 <sub>(-C=O)</sub> & N8-H18 <sub>(-NH3+)</sub> ···O3 <sub>(-NO2)</sub><br>*(N7-H8 <sub>(-NH3+)</sub> ···O3 <sub>(-NO2)</sub> ) <sub>2</sub> & N8-H13 <sub>(-NH3+)</sub> ···O1 <sub>(-C=O)</sub><br>*N7-H16 <sub>(-NH3+)</sub> ···O11 <sub>(-NO2)</sub> & N8-H10 <sub>(-NH3+)</sub> ···O8 <sub>(-C=O)</sub><br>*N8-H10 <sub>(-NH3+)</sub> ···O8 <sub>(-C=O)</sub> & C15-H6 <sub>(-CH2)</sub> ···O14 <sub>(-NO2)</sub>                                                                                                                                                                                                                                                                                                                                                                                                                    |
|               | $C_2^2(14)$ | *O16-H17 <sub>(-COOH)</sub> ···O10 <sub>(-NO2)</sub> & N8-H10 <sub>(-NH3+)</sub> ···O8 <sub>(-C=O)</sub><br>*N7-H8 <sub>(-NH3+)</sub> ···O1 <sub>(-C=O)</sub> & C14-H12 <sub>(-CH2)</sub> ···O7 <sub>(-NO2)</sub><br>*N7-H8 <sub>(-NH3+)</sub> ···O3 <sub>(-NO2)</sub> & C14-H12 <sub>(-CH2)</sub> ···O7 <sub>(-NO2)</sub>                                                                                                                                                                                                                                                                                                                                                                                                                                                                                                                                                                                                                                                                                                                                                                      |
|               | $R_1^2(6)$  | *N7-H8 <sub>(-NH3+)</sub> ···O1 <sub>(-C=O)</sub> & N7-H8 <sub>(-NH3+)</sub> ···O3 <sub>(-NO2)</sub><br>*N7-H16 <sub>(-NH3+)</sub> ···O8 <sub>(-C=O)</sub> & N7-H16 <sub>(-NH3+)</sub> ···O11 <sub>(-NO2)</sub>                                                                                                                                                                                                                                                                                                                                                                                                                                                                                                                                                                                                                                                                                                                                                                                                                                                                                 |
|               | $R_2^2(7)$  | C14-H12 <sub>(-CH2)</sub> ···O7 <sub>(-NO2)</sub> & C16-H9 <sub>(-CH2)</sub> ···O6 <sub>(-NO2)</sub>                                                                                                                                                                                                                                                                                                                                                                                                                                                                                                                                                                                                                                                                                                                                                                                                                                                                                                                                                                                            |
|               | $R_2^2(10)$ | N7-H16 <sub>(-NH3+)</sub> ···O8 <sub>(-C=O)</sub> & C15-H5 <sub>(-CH2)</sub> ···O10 <sub>(-NO2)</sub>                                                                                                                                                                                                                                                                                                                                                                                                                                                                                                                                                                                                                                                                                                                                                                                                                                                                                                                                                                                           |
|               | $R_2^2(12)$ | N7-H16 <sub>(-NH3+)</sub> ···O11 <sub>(-NO2)</sub> & C15-H5 <sub>(-CH2)</sub> ···O10 <sub>(-NO2)</sub>                                                                                                                                                                                                                                                                                                                                                                                                                                                                                                                                                                                                                                                                                                                                                                                                                                                                                                                                                                                          |
|               | $D(2)$      | *C6-H2 <sub>(-CHarom.)</sub> ···O9 <sub>(-NO2)</sub><br>*O16-H17 <sub>(-COOH)</sub> ···O10 <sub>(-NO2)</sub><br>*N7-H8 <sub>(-NH3+)</sub> ···O1 <sub>(-C=O)</sub><br>*N7-H8 <sub>(-NH3+)</sub> ···O3 <sub>(-NO2)</sub><br>*N7-H15 <sub>(-NH3+)</sub> ···O4 <sub>(-NO2)</sub><br>*N7-H16 <sub>(-NH3+)</sub> ···O8 <sub>(-C=O)</sub><br>*N7-H16 <sub>(-NH3+)</sub> ···O11 <sub>(-NO2)</sub><br>*N8-H10 <sub>(-NH3+)</sub> ···O8 <sub>(-C=O)</sub><br>*N8-H13 <sub>(-NH3+)</sub> ···O4 <sub>(-NO2)</sub><br>*N8-H18 <sub>(-NH3+)</sub> ···O3 <sub>(-NO2)</sub><br>*C13-H7 <sub>(-CH)</sub> ···O12 <sub>(-NO2)</sub><br>*C16-H9 <sub>(-CH2)</sub> ···O6 <sub>(-NO2)</sub><br>*C14-H12 <sub>(-CH2)</sub> ···O7 <sub>(-NO2)</sub><br>*C15-H15 <sub>(-CH2)</sub> ···O8 <sub>(-C=O)</sub><br>*C15-H5 <sub>(-CH2)</sub> ···O10 <sub>(-NO2)</sub><br>*C15-H6 <sub>(-CH2)</sub> ···O14 <sub>(-NO2)</sub>                                                                                                                                                                                                   |
|               | $D_2^2(5)$  | *N7-H16 <sub>(-NH3+)</sub> ···O11 <sub>(-NO2)</sub> & C6-H2 <sub>(-CHarom.)</sub> ···O9 <sub>(-NO2)</sub><br>*N7-H8 <sub>(-NH3+)</sub> ···O1 <sub>(-C=O)</sub> & N7-H16 <sub>(-NH3+)</sub> ···O8 <sub>(-C=O)</sub><br>*N7-H8 <sub>(-NH3+)</sub> ···O3 <sub>(-NO2)</sub> & N7-H16 <sub>(-NH3+)</sub> ···O8 <sub>(-C=O)</sub>                                                                                                                                                                                                                                                                                                                                                                                                                                                                                                                                                                                                                                                                                                                                                                     |
|               | $D_2^2(6)$  | *N7-H8 <sub>(-NH3+)</sub> ···O1 <sub>(-C=O)</sub> & C13-H7 <sub>(-CH)</sub> ···O12 <sub>(-NO2)</sub><br>*N7-H8 <sub>(-NH3+)</sub> ···O3 <sub>(-NO2)</sub> & C13-H7 <sub>(-CH)</sub> ···O12 <sub>(-NO2)</sub>                                                                                                                                                                                                                                                                                                                                                                                                                                                                                                                                                                                                                                                                                                                                                                                                                                                                                    |
|               | $D_2^2(7)$  | *N7-H8 <sub>(-NH3+)</sub> ···O1 <sub>(-C=O)</sub> & C6-H2 <sub>(-CHarom.)</sub> ···O9 <sub>(-NO2)</sub><br>*N7-H15 <sub>(-NH3+)</sub> ···O4 <sub>(-NO2)</sub> & C6-H2 <sub>(-CHarom.)</sub> ···O9 <sub>(-NO2)</sub><br>*N7-H8 <sub>(-NH3+)</sub> ···O1 <sub>(-C=O)</sub> & C15-H5 <sub>(-CH2)</sub> ···O8 <sub>(-C=O)</sub><br>*N7-H8 <sub>(-NH3+)</sub> ···O3 <sub>(-NO2)</sub> & C15-H5 <sub>(-CH2)</sub> ···O8 <sub>(-C=O)</sub>                                                                                                                                                                                                                                                                                                                                                                                                                                                                                                                                                                                                                                                             |

|               |             |                                                                                                                                                                                                                                                                                                                                                                                                                                                                                                                                                             |
|---------------|-------------|-------------------------------------------------------------------------------------------------------------------------------------------------------------------------------------------------------------------------------------------------------------------------------------------------------------------------------------------------------------------------------------------------------------------------------------------------------------------------------------------------------------------------------------------------------------|
|               | $D_2^2(8)$  | *O16-H17 <sub>(-COOH)</sub> ···O10 <sub>(-NO2)</sub> & N7-H8 <sub>(-NH3+)</sub> ···O1 <sub>(-C=O)</sub><br>*N7-H16 <sub>(-NH3+)</sub> ···O8 <sub>(-C=O)</sub> & C16-H9 <sub>(-CH2)</sub> ···O6 <sub>(-NO2)</sub>                                                                                                                                                                                                                                                                                                                                            |
|               | $D_2^2(9)$  | *C6-H2 <sub>(-CHarom.)</sub> ···O11 <sub>(-NO2)</sub> & O16-H17 <sub>(-COOH)</sub> ···O10 <sub>(-NO2)</sub><br>*N7-H8 <sub>(-NH3+)</sub> ···O3 <sub>(-NO2)</sub> & C6-H2 <sub>(-CHarom.)</sub> ···O9 <sub>(-NO2)</sub><br>*O16-H17 <sub>(-COOH)</sub> ···O10 <sub>(-NO2)</sub> & C16-H9 <sub>(-CH2)</sub> ···O6 <sub>(-NO2)</sub><br>*N7-H16 <sub>(-NH3+)</sub> ···O8 <sub>(-C=O)</sub> & C14-H12 <sub>(-CH2)</sub> ···O7 <sub>(-NO2)</sub>                                                                                                                 |
|               | $D_2^2(10)$ | *O16-H17 <sub>(-COOH)</sub> ···O10 <sub>(-NO2)</sub> & N8-H13 <sub>(-NH3+)</sub> ···O1 <sub>(-C=O)</sub><br>*O16-H17 <sub>(-COOH)</sub> ···O10 <sub>(-NO2)</sub> & C14-H12 <sub>(-CH2)</sub> ···O7 <sub>(-NO2)</sub><br>*N7-H8 <sub>(-NH3+)</sub> ···O1 <sub>(-C=O)</sub> & N8-H10 <sub>(-NH3+)</sub> ···O8 <sub>(-C=O)</sub><br>*N7-H8 <sub>(-NH3+)</sub> ···O3 <sub>(-NO2)</sub> & N8-H10 <sub>(-NH3+)</sub> ···O8 <sub>(-C=O)</sub><br>*N7-H16 <sub>(-NH3+)</sub> ···O11 <sub>(-NO2)</sub> & N8-H13 <sub>(-NH3+)</sub> ···O1 <sub>(-C=O)</sub>           |
|               | $D_2^2(11)$ | O16-H17 <sub>(-COOH)</sub> ···O10 <sub>(-NO2)</sub> & N8-H18 <sub>(-NH3+)</sub> ···O3 <sub>(-NO2)</sub>                                                                                                                                                                                                                                                                                                                                                                                                                                                     |
|               | $D_2^3(10)$ | (N7-H16 <sub>(-NH3+)</sub> ···O11 <sub>(-NO2)</sub> ) <sub>2</sub> & C12-H3 <sub>(-CHarom.)</sub> ···O11 <sub>(-NO2)</sub>                                                                                                                                                                                                                                                                                                                                                                                                                                  |
|               | $D_3^3(12)$ | *C6-H2 <sub>(-CHarom.)</sub> ···O9 <sub>(-NO2)</sub> & C12-H3 <sub>(-CHarom.)</sub> ···O11 <sub>(-NO2)</sub> & C6-H2 <sub>(-CHarom.)</sub> ···O9 <sub>(-NO2)</sub><br>*(N7-H16 <sub>(-NH3+)</sub> ···O8 <sub>(-C=O)</sub> ) <sub>2</sub> & C12-H3 <sub>(-CHarom.)</sub> ···O11 <sub>(-NO2)</sub><br>*(N8-H10 <sub>(-NH3+)</sub> ···O8 <sub>(-C=O)</sub> ) <sub>2</sub> & C12-H3 <sub>(-CHarom.)</sub> ···O11 <sub>(-NO2)</sub><br>*C12-H3 <sub>(-CHarom.)</sub> ···O11 <sub>(-NO2)</sub> & (C15-H5 <sub>(-CH2)</sub> ···O8 <sub>(-C=O)</sub> ) <sub>2</sub> |
|               | $D_3^3(14)$ | *(O6-H17 <sub>(-NO2)</sub> ···O10 <sub>(-NO2)</sub> ) <sub>2</sub> & C12-H3 <sub>(-CHarom.)</sub> ···O11 <sub>(-NO2)</sub><br>*C12-H3 <sub>(-CHarom.)</sub> ···O11 <sub>(-NO2)</sub> & (C13-H7 <sub>(-CH)</sub> ···O12 <sub>(-NO2)</sub> ) <sub>2</sub>                                                                                                                                                                                                                                                                                                     |
| <b>EXOFAY</b> | D(2)        | *O1-H2 <sub>(-COOH)</sub> ···C11<br>*N1-H9 <sub>(-NH3+)</sub> ···C11<br>*N1-H11 <sub>(-NH3+)</sub> ···C11                                                                                                                                                                                                                                                                                                                                                                                                                                                   |
|               | C(4)        | N2-H12 <sub>(-NH)</sub> ornithine ···O4 <sub>(-O=C)</sub> FMOC                                                                                                                                                                                                                                                                                                                                                                                                                                                                                              |
|               | C(5)        | C3-H4 <sub>(-CH2)</sub> ···O1 <sub>(-COOH)</sub> ornithine                                                                                                                                                                                                                                                                                                                                                                                                                                                                                                  |
|               | C(13)       | C3-H3 <sub>(-CH2)</sub> ornithine ···C13 <sub>(-Carom.)</sub> FMOC                                                                                                                                                                                                                                                                                                                                                                                                                                                                                          |
| level 2       | $C_2^1(4)$  | N1-H9 <sub>(-NH3+)</sub> ···C11 & N1-H11 <sub>(-NH3+)</sub> ···C11                                                                                                                                                                                                                                                                                                                                                                                                                                                                                          |
|               | $C_2^1(10)$ | *(O1-H2 <sub>(-COOH)</sub> ···C11) <sub>2</sub> & N1-H9 <sub>(-NH3+)</sub> ···C11<br>*(O1-H2 <sub>(-COOH)</sub> ···C11) <sub>2</sub> & N1-H11 <sub>(-NH3+)</sub> ···C11                                                                                                                                                                                                                                                                                                                                                                                     |
|               | $C_2^2(11)$ | N2-H12 <sub>(-NH)</sub> ornithine ···O4 <sub>(-O=C)</sub> FMOC & C3-H4 <sub>(-CH2)</sub> ···O1 <sub>(-COOH)</sub> ornithine                                                                                                                                                                                                                                                                                                                                                                                                                                 |
|               | $R_2^2(11)$ | N2-H12 <sub>(-NH)</sub> ornithine ···O4 <sub>(-O=C)</sub> FMOC & C3-H4 <sub>(-CH2)</sub> ···O1 <sub>(-COOH)</sub> ornithine                                                                                                                                                                                                                                                                                                                                                                                                                                 |
|               | $D_2^2(5)$  | *N1-H9 <sub>(-NH3+)</sub> ···C11 & N1-H10 <sub>(-NH3+)</sub> ···O5 <sub>(-C-O-C)</sub><br>*N1-H10 <sub>(-NH3+)</sub> ···O5 <sub>(-C-O-C)</sub> & N1-H11 <sub>(-NH3+)</sub> ···C11                                                                                                                                                                                                                                                                                                                                                                           |
|               | $D_2^2(11)$ | O1-H2 <sub>(-COOH)</sub> ···C11 & N1-H10 <sub>(-NH3+)</sub> ···O5 <sub>(-C-O-C)</sub>                                                                                                                                                                                                                                                                                                                                                                                                                                                                       |
|               | $D_3^3(10)$ | (O1-H2 <sub>(-COOH)</sub> ···C11) <sub>2</sub> & C3-H4 <sub>(-CH2)</sub> ···O1 <sub>(-COOH)</sub> ornithine                                                                                                                                                                                                                                                                                                                                                                                                                                                 |
|               | $D_3^3(15)$ | (O1-H2 <sub>(-COOH)</sub> ···C11) <sub>2</sub> & N2-H12 <sub>(-NH)</sub> ornithine ···O4 <sub>(-O=C)</sub> FMOC                                                                                                                                                                                                                                                                                                                                                                                                                                             |
|               | $D_3^3(16)$ | *(N1-H9 <sub>(-NH3+)</sub> ···C11) <sub>2</sub> & C3-H4 <sub>(-CH2)</sub> ···O1 <sub>(-COOH)</sub> ornithine<br>*(N1-H10 <sub>(-NH3+)</sub> ···O5 <sub>(-C-O-C)</sub> ) <sub>2</sub> & C3-H4 <sub>(-CH2)</sub> ···O1 <sub>(-COOH)</sub> ornithine<br>*(N1-H11 <sub>(-NH3+)</sub> ···C11) <sub>2</sub> & C3-H4 <sub>(-CH2)</sub> ···O1 <sub>(-COOH)</sub> ornithine                                                                                                                                                                                          |
|               | $D_3^3(19)$ | *(N1-H9 <sub>(-NH3+)</sub> ···C11) <sub>2</sub> & N2-H12 <sub>(-NH)</sub> ornithine ···O4 <sub>(-O=C)</sub> FMOC<br>*(N1-H10 <sub>(-NH3+)</sub> ···O5 <sub>(-C-O-C)</sub> ) <sub>2</sub> & N2-H12 <sub>(-NH)</sub> ornithine ···O4 <sub>(-O=C)</sub> FMOC<br>*(N1-H11 <sub>(-NH3+)</sub> ···C11) <sub>2</sub> & N2-H12 <sub>(-NH)</sub> ornithine ···O4 <sub>(-O=C)</sub> FMOC                                                                                                                                                                              |
| <b>IHEPES</b> | C(9)        | *N2-H3···C12<br>*N2-H4···C12                                                                                                                                                                                                                                                                                                                                                                                                                                                                                                                                |
|               | $C_2^1(4)$  | *N2-H3···C12 & N2-H3···C12A<br>*N2-H4···C12A & N2-H4···C12                                                                                                                                                                                                                                                                                                                                                                                                                                                                                                  |
|               | C(7)        | C5-H11···F1                                                                                                                                                                                                                                                                                                                                                                                                                                                                                                                                                 |
|               | D(2)        | *O3-H13···C11<br>*O3-H14···O1<br>*N2-H5···O3<br>*C4-H8···O3<br>*C6-H12···O3                                                                                                                                                                                                                                                                                                                                                                                                                                                                                 |
| Level 2       | $C_2^1(4)$  | N2-H3···C12 & N2-H4···C12                                                                                                                                                                                                                                                                                                                                                                                                                                                                                                                                   |
|               | $C_2^1(6)$  | N2-H5···O3 & C4-H8···O3                                                                                                                                                                                                                                                                                                                                                                                                                                                                                                                                     |
|               | $C_2^1(7)$  | C4-H8···O3 & C6-H12···O3                                                                                                                                                                                                                                                                                                                                                                                                                                                                                                                                    |
|               | $C_2^1(9)$  | (N2-H5···O3) <sub>2</sub> & C6-H12···O3                                                                                                                                                                                                                                                                                                                                                                                                                                                                                                                     |
|               | $C_2^2(8)$  | *O3-H13···C11 & O3-H14···O1<br>*O3-H14···O1 & C4-H8···O3<br>*O3-H13···C11 & C6-H12···O3                                                                                                                                                                                                                                                                                                                                                                                                                                                                     |
|               | $C_2^2(9)$  | O3-H13···C11 & C4-H8···O3                                                                                                                                                                                                                                                                                                                                                                                                                                                                                                                                   |
|               | $C_2^2(10)$ | *O3-H14···O1 & N2-H5···O3<br>*N2-H3···C12 & C5-H11···F1<br>*N2-H4···C12A & C5-H11···F1                                                                                                                                                                                                                                                                                                                                                                                                                                                                      |
|               | $C_2^2(11)$ | *N2-H3···C12 & N2-H4···C12<br>*N2-H3···C12 & N2-H4···C12A                                                                                                                                                                                                                                                                                                                                                                                                                                                                                                   |
|               | $C_2^2(16)$ | *N2-H3···C12 & C5-H11···F1                                                                                                                                                                                                                                                                                                                                                                                                                                                                                                                                  |

|               |                                  |                                                                                                                                                                                                                                                                                                                                                                                                                                                                                                                                                                                                                                                                                                                                                                                                                                                                                                                                                                                                                                                                                                                                                                                                                                                                                                                      |
|---------------|----------------------------------|----------------------------------------------------------------------------------------------------------------------------------------------------------------------------------------------------------------------------------------------------------------------------------------------------------------------------------------------------------------------------------------------------------------------------------------------------------------------------------------------------------------------------------------------------------------------------------------------------------------------------------------------------------------------------------------------------------------------------------------------------------------------------------------------------------------------------------------------------------------------------------------------------------------------------------------------------------------------------------------------------------------------------------------------------------------------------------------------------------------------------------------------------------------------------------------------------------------------------------------------------------------------------------------------------------------------|
|               |                                  | *N2-H4 $\cdots$ Cl2A & C5-H11 $\cdots$ F1                                                                                                                                                                                                                                                                                                                                                                                                                                                                                                                                                                                                                                                                                                                                                                                                                                                                                                                                                                                                                                                                                                                                                                                                                                                                            |
|               | C <sub>2</sub> <sup>2</sup> (18) | N2-H3 $\cdots$ Cl2 & N2-H4 $\cdots$ Cl2A                                                                                                                                                                                                                                                                                                                                                                                                                                                                                                                                                                                                                                                                                                                                                                                                                                                                                                                                                                                                                                                                                                                                                                                                                                                                             |
|               | C <sub>2</sub> <sup>3</sup> (15) | *N2-H3 $\cdots$ Cl2 & N2-H3 $\cdots$ Cl2A & C5-H11 $\cdots$ F1<br>(N1-H4 $\cdots$ Cl2A) <sub>2</sub> & C5-H11 $\cdots$ F1                                                                                                                                                                                                                                                                                                                                                                                                                                                                                                                                                                                                                                                                                                                                                                                                                                                                                                                                                                                                                                                                                                                                                                                            |
|               | C <sub>3</sub> <sup>3</sup> (15) | *N2-H3 $\cdots$ Cl2 & N2-H3 $\cdots$ Cl2A & N2-H4 $\cdots$ Cl2A<br>*N2-H3 $\cdots$ Cl2 & (N2-H4 $\cdots$ Cl2A) <sub>2</sub><br>*N2-H3 $\cdots$ Cl2 & N2-H3 $\cdots$ Cl2A & C5-H11 $\cdots$ F1<br>*N2-H4 $\cdots$ Cl2 & N2-H4 $\cdots$ Cl2A & C5-H11 $\cdots$ F1                                                                                                                                                                                                                                                                                                                                                                                                                                                                                                                                                                                                                                                                                                                                                                                                                                                                                                                                                                                                                                                      |
|               | R <sub>2</sub> <sup>2</sup> (4)  | N2-H4 $\cdots$ Cl2A & N2-H3 $\cdots$ Cl2A                                                                                                                                                                                                                                                                                                                                                                                                                                                                                                                                                                                                                                                                                                                                                                                                                                                                                                                                                                                                                                                                                                                                                                                                                                                                            |
|               | R <sub>2</sub> <sup>2</sup> (6)  | N2-H3 $\cdots$ Cl2 & N2-H4 $\cdots$ Cl2A                                                                                                                                                                                                                                                                                                                                                                                                                                                                                                                                                                                                                                                                                                                                                                                                                                                                                                                                                                                                                                                                                                                                                                                                                                                                             |
|               | R <sub>2</sub> <sup>2</sup> (7)  | O3-H14 $\cdots$ O1 & C6-H12 $\cdots$ O3                                                                                                                                                                                                                                                                                                                                                                                                                                                                                                                                                                                                                                                                                                                                                                                                                                                                                                                                                                                                                                                                                                                                                                                                                                                                              |
|               | R <sub>2</sub> <sup>2</sup> (11) | O3-H13 $\cdots$ Cl1 & N2-H5 $\cdots$ O3                                                                                                                                                                                                                                                                                                                                                                                                                                                                                                                                                                                                                                                                                                                                                                                                                                                                                                                                                                                                                                                                                                                                                                                                                                                                              |
|               | R <sub>3</sub> <sup>3</sup> (8)  | *N2-H3 $\cdots$ Cl2 & N2-H3 $\cdots$ Cl2A & N2-H4 $\cdots$ Cl2A<br>*(N2-H4 $\cdots$ Cl2A) <sub>2</sub> & N2-H3 $\cdots$ Cl2                                                                                                                                                                                                                                                                                                                                                                                                                                                                                                                                                                                                                                                                                                                                                                                                                                                                                                                                                                                                                                                                                                                                                                                          |
|               | R <sub>4</sub> <sup>4</sup> (12) | *N2-H3 $\cdots$ Cl2 & N2-H3 $\cdots$ Cl2A & (N2-H4 $\cdots$ Cl2A) <sub>2</sub>                                                                                                                                                                                                                                                                                                                                                                                                                                                                                                                                                                                                                                                                                                                                                                                                                                                                                                                                                                                                                                                                                                                                                                                                                                       |
|               | R <sub>3</sub> <sup>5</sup> (19) | *(N2-H3 $\cdots$ Cl2A) <sub>2</sub> & C5-H11 $\cdots$ F1<br>*(N2-H4 $\cdots$ Cl2A) <sub>2</sub> & C5-H11 $\cdots$ F1                                                                                                                                                                                                                                                                                                                                                                                                                                                                                                                                                                                                                                                                                                                                                                                                                                                                                                                                                                                                                                                                                                                                                                                                 |
|               | R <sub>4</sub> <sup>5</sup> (19) | *(N2-H3 $\cdots$ Cl2A) <sub>2</sub> & N2-H3 $\cdots$ Cl2 & C5-H11 $\cdots$ F1                                                                                                                                                                                                                                                                                                                                                                                                                                                                                                                                                                                                                                                                                                                                                                                                                                                                                                                                                                                                                                                                                                                                                                                                                                        |
|               | D <sub>3</sub> <sup>3</sup> (12) | (C4-H8 $\cdots$ O3) <sub>2</sub> & C5-H11 $\cdots$ F1<br>* C5-H11 $\cdots$ F1 & (C6-H12 $\cdots$ O3) <sub>2</sub>                                                                                                                                                                                                                                                                                                                                                                                                                                                                                                                                                                                                                                                                                                                                                                                                                                                                                                                                                                                                                                                                                                                                                                                                    |
|               | D <sub>3</sub> <sup>3</sup> (14) | *(O3-H13 $\cdots$ Cl1) <sub>2</sub> & N2-H3 $\cdots$ Cl2<br>*(O3-H13 $\cdots$ Cl1) <sub>2</sub> & N2-H4 $\cdots$ Cl2A<br>*(O3-H14 $\cdots$ O1) <sub>2</sub> & C5-H11 $\cdots$ F1<br>*(N2-H5 $\cdots$ O3) <sub>2</sub> & N2-H3 $\cdots$ Cl2<br>*(N2-H5 $\cdots$ O3) <sub>2</sub> & C5-H11 $\cdots$ F1<br>*N2-H3 $\cdots$ Cl2 & (C4-H8 $\cdots$ O3) <sub>2</sub><br>*N2-H4 $\cdots$ Cl2 & (C4-H8 $\cdots$ O3) <sub>2</sub><br>*N2-H4 $\cdots$ Cl2A & (N2-H5 $\cdots$ O3) <sub>2</sub>                                                                                                                                                                                                                                                                                                                                                                                                                                                                                                                                                                                                                                                                                                                                                                                                                                  |
|               | D <sub>3</sub> <sup>3</sup> (15) | *(O3-H14 $\cdots$ O1) <sub>2</sub> & N2-H3 $\cdots$ Cl2<br>*(O3-H14 $\cdots$ O1) <sub>2</sub> & N2-H4 $\cdots$ Cl2A                                                                                                                                                                                                                                                                                                                                                                                                                                                                                                                                                                                                                                                                                                                                                                                                                                                                                                                                                                                                                                                                                                                                                                                                  |
|               | D <sub>3</sub> <sup>3</sup> (16) | *(O3-H13 $\cdots$ Cl1) <sub>2</sub> & C5-H11 $\cdots$ F1<br>*N2-H3 $\cdots$ Cl2 & (C6-H12 $\cdots$ O3) <sub>2</sub><br>*N2-H4 $\cdots$ Cl2A & (C6-H12 $\cdots$ O3) <sub>2</sub>                                                                                                                                                                                                                                                                                                                                                                                                                                                                                                                                                                                                                                                                                                                                                                                                                                                                                                                                                                                                                                                                                                                                      |
| <b>JADGED</b> | C(2)                             | C8-H22 <sub>(-CH2)</sub> $\cdots$ O12 <sub>(-C=O)</sub>                                                                                                                                                                                                                                                                                                                                                                                                                                                                                                                                                                                                                                                                                                                                                                                                                                                                                                                                                                                                                                                                                                                                                                                                                                                              |
|               | C(4)                             | C7-H20 <sub>(-CH)</sub> $\cdots$ O3 <sub>(-COO-)</sub><br>C19-H35 <sub>(-CH2)</sub> $\cdots$ O13 <sub>(-COOH)</sub>                                                                                                                                                                                                                                                                                                                                                                                                                                                                                                                                                                                                                                                                                                                                                                                                                                                                                                                                                                                                                                                                                                                                                                                                  |
|               | C(5)                             | N1-H2 <sub>(-NH3+)</sub> $\cdots$ O1 <sub>(-COO-)</sub>                                                                                                                                                                                                                                                                                                                                                                                                                                                                                                                                                                                                                                                                                                                                                                                                                                                                                                                                                                                                                                                                                                                                                                                                                                                              |
|               | C(6)                             | C4-H10 <sub>(-CH2)</sub> $\cdots$ O1 <sub>(-COO-)</sub>                                                                                                                                                                                                                                                                                                                                                                                                                                                                                                                                                                                                                                                                                                                                                                                                                                                                                                                                                                                                                                                                                                                                                                                                                                                              |
|               | D(2)                             | *N1-H1 <sub>(-NH3+)</sub> $\cdots$ O5 <sub>(-COO-)</sub><br>*N1-H3 <sub>(-NH3+)</sub> $\cdots$ O5 <sub>(-COO-)</sub><br>*N1-H3 <sub>(-NH3+)</sub> $\cdots$ O7 <sub>(-C=O)</sub><br>*N2-H4 <sub>(-NH3+)</sub> $\cdots$ O3 <sub>(-COO-)</sub><br>*N2-H5 <sub>(-NH3+)</sub> $\cdots$ O8 <sub>(-COOH)</sub><br>*N2-H6 <sub>(-NH3+)</sub> $\cdots$ O11 <sub>(-COOH)</sub><br>*C2-H7 <sub>(-CH)</sub> $\cdots$ O5 <sub>(-COO-)</sub><br>*C3-H9 <sub>(-CH2)</sub> $\cdots$ O7 <sub>(-C=O)</sub><br>*C5-H12 <sub>(-CH2)</sub> $\cdots$ O7 <sub>(-C=O)</sub><br>*C5-H12 <sub>(-CH2)</sub> $\cdots$ O9 <sub>(-COOH)</sub><br>*C5-H13 <sub>(-CH2)</sub> $\cdots$ O11 <sub>(-COOH)</sub><br>*N3-H14 <sub>(-NH3+)</sub> $\cdots$ O10 <sub>(-COOH)</sub><br>*N3-H15 <sub>(-NH3+)</sub> $\cdots$ O10 <sub>(-COOH)</sub><br>*N3-H15 <sub>(-NH3+)</sub> $\cdots$ O12 <sub>(-C=O)</sub><br>*N3-H16 <sub>(-NH3+)</sub> $\cdots$ O10 <sub>(-COOH)</sub><br>*N4-H17 <sub>(-NH3+)</sub> $\cdots$ O1 <sub>(-COO-)</sub><br>*N4-H18 <sub>(-NH3+)</sub> $\cdots$ O6 <sub>(-COO-)</sub><br>*N4-H19 <sub>(-NH3+)</sub> $\cdots$ O14 <sub>(-COOH)</sub><br>*C10-H26 <sub>(-CH2)</sub> $\cdots$ O14 <sub>(-COOH)</sub><br>*O9-H27 <sub>(-COOH)</sub> $\cdots$ O4 <sub>(-COO-)</sub><br>*O13-H32 <sub>(-COOH)</sub> $\cdots$ O2 <sub>(-COO-)</sub> |
| level 2       | C <sub>2</sub> <sup>1</sup> (4)  | *N1-H3 <sub>(-NH3+)</sub> $\cdots$ O5 <sub>(-COO-)</sub> & N1-H1 <sub>(-NH3+)</sub> $\cdots$ O5 <sub>(-COO-)</sub><br>*N3-H14 <sub>(-NH3+)</sub> $\cdots$ O10 <sub>(-COOH)</sub> & N3-H15 <sub>(-NH3+)</sub> $\cdots$ O10 <sub>(-COOH)</sub><br>*N3-H16 <sub>(-NH3+)</sub> $\cdots$ O10 <sub>(-COOH)</sub> & N3-H14 <sub>(-NH3+)</sub> $\cdots$ O10 <sub>(-COOH)</sub><br>*N3-H16 <sub>(-NH3+)</sub> $\cdots$ O10 <sub>(-COOH)</sub> & N3-H15 <sub>(-NH3+)</sub> $\cdots$ O10 <sub>(-COOH)</sub>                                                                                                                                                                                                                                                                                                                                                                                                                                                                                                                                                                                                                                                                                                                                                                                                                     |
|               | C <sub>2</sub> <sup>1</sup> (5)  | *N1-H1 <sub>(-NH3+)</sub> $\cdots$ O5 <sub>(-COO-)</sub> & C2-H7 <sub>(-CH)</sub> $\cdots$ O5 <sub>(-COO-)</sub><br>*N1-H3 <sub>(-NH3+)</sub> $\cdots$ O5 <sub>(-COO-)</sub> & C2-H7 <sub>(-CH)</sub> $\cdots$ O5 <sub>(-COO-)</sub>                                                                                                                                                                                                                                                                                                                                                                                                                                                                                                                                                                                                                                                                                                                                                                                                                                                                                                                                                                                                                                                                                 |

|             |  |                                                                                                                                                                                                                                                                                                                                                                                                                                                                                                                                                                                                                                                                                                                                                                                                                                                                                                                                                                                                                                                                                                               |
|-------------|--|---------------------------------------------------------------------------------------------------------------------------------------------------------------------------------------------------------------------------------------------------------------------------------------------------------------------------------------------------------------------------------------------------------------------------------------------------------------------------------------------------------------------------------------------------------------------------------------------------------------------------------------------------------------------------------------------------------------------------------------------------------------------------------------------------------------------------------------------------------------------------------------------------------------------------------------------------------------------------------------------------------------------------------------------------------------------------------------------------------------|
|             |  | *N2-H6 <sub>(-NH3+)</sub> ···O11 <sub>(-COOH)</sub> & C5-H13 <sub>(-CH2)</sub> ···O11 <sub>(-COOH)</sub><br>*N4-H19 <sub>(-NH3+)</sub> ···O14 <sub>(-COOH)</sub> & C10-H26 <sub>(-CH2)</sub> ···O14 <sub>(-COOH)</sub>                                                                                                                                                                                                                                                                                                                                                                                                                                                                                                                                                                                                                                                                                                                                                                                                                                                                                        |
| $C_2^2(7)$  |  | *N1-H3 <sub>(-NH3+)</sub> ···O7 <sub>(-C=O)</sub> & N1-H1 <sub>(-NH3+)</sub> ···O5 <sub>(-COO-)</sub><br>*N2-H5 <sub>(-NH3+)</sub> ···O8 <sub>(-COOH)</sub> & C5-H12 <sub>(-CH2)</sub> ···O9 <sub>(-COOH)</sub><br>*N3-H14 <sub>(-NH3+)</sub> ···O10 <sub>(-COOH)</sub> & N3-H15 <sub>(-NH3+)</sub> ···O12 <sub>(-C=O)</sub><br>*N3-H15 <sub>(-NH3+)</sub> ···O13 <sub>(-COOH)</sub> & N3-H16 <sub>(-NH3+)</sub> ···O10 <sub>(-COOH)</sub>                                                                                                                                                                                                                                                                                                                                                                                                                                                                                                                                                                                                                                                                    |
| $C_2^2(8)$  |  | *N1-H3 <sub>(-NH3+)</sub> ···O7 <sub>(-C=O)</sub> & C2-H7 <sub>(-CH)</sub> ···O5 <sub>(-COO-)</sub><br>*C2-H7 <sub>(-CH)</sub> ···O5 <sub>(-COO-)</sub> & C3-H9 <sub>(-CH2)</sub> ···O7 <sub>(-C=O)</sub>                                                                                                                                                                                                                                                                                                                                                                                                                                                                                                                                                                                                                                                                                                                                                                                                                                                                                                     |
| $C_2^2(9)$  |  | *N1-H1 <sub>(-NH3+)</sub> ···O5 <sub>(-COO-)</sub> & C3-H9 <sub>(-CH2)</sub> ···O7 <sub>(-C=O)</sub><br>*N3-H14 <sub>(-NH3+)</sub> ···O10 <sub>(-COOH)</sub> & C8-H22 <sub>(-CH2)</sub> ···O12 <sub>(-C=O)</sub>                                                                                                                                                                                                                                                                                                                                                                                                                                                                                                                                                                                                                                                                                                                                                                                                                                                                                              |
| $C_2^2(10)$ |  | *N2-H5 <sub>(-NH3+)</sub> ···O8 <sub>(-COOH)</sub> & C5-H12 <sub>(-CH2)</sub> ···O7 <sub>(-C=O)</sub><br>*C2-H7 <sub>(-CH)</sub> ···O5 <sub>(-COO-)</sub> & C5-H12 <sub>(-CH2)</sub> ···O7 <sub>(-C=O)</sub>                                                                                                                                                                                                                                                                                                                                                                                                                                                                                                                                                                                                                                                                                                                                                                                                                                                                                                  |
| $C_2^2(11)$ |  | *(N1-H1 <sub>(-NH3+)</sub> ···O5 <sub>(-COO-)</sub> ) <sub>2</sub> & C5-H12 <sub>(-CH2)</sub> ···O7 <sub>(-C=O)</sub><br>*N1-H4 <sub>(-NH3+)</sub> ···O1 <sub>(-COO-)</sub> & C4-H10 <sub>(-CH2)</sub> ···O1 <sub>(-COO-)</sub>                                                                                                                                                                                                                                                                                                                                                                                                                                                                                                                                                                                                                                                                                                                                                                                                                                                                               |
| $C_2^2(12)$ |  | *N2-H5 <sub>(-NH3+)</sub> ···O8 <sub>(-COOH)</sub> & C3-H9 <sub>(-CH2)</sub> ···O7 <sub>(-C=O)</sub><br>*N14-H19 <sub>(-NH3+)</sub> ···O14 <sub>(-COOH)</sub> & C8-H22 <sub>(-CH2)</sub> ···O12 <sub>(-C=O)</sub>                                                                                                                                                                                                                                                                                                                                                                                                                                                                                                                                                                                                                                                                                                                                                                                                                                                                                             |
| $C_2^2(13)$ |  | C2-H7 <sub>(-CH)</sub> ···O5 <sub>(-COO-)</sub> & C5-H12 <sub>(-CH2)</sub> ···O9 <sub>(-COOH)</sub>                                                                                                                                                                                                                                                                                                                                                                                                                                                                                                                                                                                                                                                                                                                                                                                                                                                                                                                                                                                                           |
| $C_2^2(14)$ |  | *N1-H1 <sub>(-NH3+)</sub> ···O5 <sub>(-COO-)</sub> & C5-H12 <sub>(-CH2)</sub> ···O9 <sub>(-COOH)</sub><br>*N1-H3 <sub>(-NH3+)</sub> ···O7 <sub>(-C=O)</sub> & N2-H5 <sub>(-NH3+)</sub> ···O8 <sub>(-COOH)</sub><br>*N3-H14 <sub>(-NH3+)</sub> ···O10 <sub>(-COOH)</sub> & C10-H26 <sub>(-CH2)</sub> ···O14 <sub>(-COOH)</sub><br>*N3-H15 <sub>(-NH3+)</sub> ···O12 <sub>(-C=O)</sub> & N4-H19 <sub>(-NH3+)</sub> ···O14 <sub>(-COOH)</sub><br>*C10-H26 <sub>(-CH2)</sub> ···O14 <sub>(-COOH)</sub> & N3-H16 <sub>(-NH3+)</sub> ···O10 <sub>(-COOH)</sub>                                                                                                                                                                                                                                                                                                                                                                                                                                                                                                                                                      |
| $C_2^2(15)$ |  | *N1-H1 <sub>(-NH3+)</sub> ···O5 <sub>(-COO-)</sub> & N2-H5 <sub>(-NH3+)</sub> ···O8 <sub>(-COOH)</sub><br>*N1-H3 <sub>(-NH3+)</sub> ···O5 <sub>(-COO-)</sub> & N2-H5 <sub>(-NH3+)</sub> ···O8 <sub>(-COOH)</sub><br>*O13-H32 <sub>(-COOH)</sub> ···O2 <sub>(-COO-)</sub> & C5-H13 <sub>(-CH2)</sub> ···O11 <sub>(-COOH)</sub><br>*N3-H14 <sub>(-NH3+)</sub> ···O10 <sub>(-COOH)</sub> & N4-H19 <sub>(-NH3+)</sub> ···O14 <sub>(-COOH)</sub><br>*N3-H15 <sub>(-NH3+)</sub> ···O10 <sub>(-COOH)</sub> & N4-H19 <sub>(-NH3+)</sub> ···O14 <sub>(-COOH)</sub>                                                                                                                                                                                                                                                                                                                                                                                                                                                                                                                                                     |
| $C_2^2(16)$ |  | O9 <sub>(COOH)</sub> -H27···O4 <sub>(-COO-)</sub> & N4-H18 <sub>(-NH3+)</sub> ···O6 <sub>(-COO-)</sub>                                                                                                                                                                                                                                                                                                                                                                                                                                                                                                                                                                                                                                                                                                                                                                                                                                                                                                                                                                                                        |
| $R_2^1(6)$  |  | *N1-H3 <sub>(-NH3+)</sub> ···O7 <sub>(-C=O)</sub> & C3-H9 <sub>(-CH2)</sub> ···O7 <sub>(-C=O)</sub><br>*C3-H9 <sub>(-CH2)</sub> ···O7 <sub>(-C=O)</sub> & C5-H12 <sub>(-CH2)</sub> ···O7 <sub>(-C=O)</sub><br>*N3-H15 <sub>(-NH3+)</sub> ···O12 <sub>(-C=O)</sub> & C8-H22 <sub>(-CH2)</sub> ···O12 <sub>(-C=O)</sub>                                                                                                                                                                                                                                                                                                                                                                                                                                                                                                                                                                                                                                                                                                                                                                                         |
| $R_2^1(7)$  |  | *N1-H2 <sub>(-NH3+)</sub> ···O1 <sub>(-COO-)</sub> & C4-H10 <sub>(-CH2)</sub> ···O1 <sub>(-COO-)</sub><br>*C5-H12 <sub>(-CH2)</sub> ···O9 <sub>(-COOH)</sub> & C5-H12 <sub>(-CH2)</sub> ···O7 <sub>(-C=O)</sub>                                                                                                                                                                                                                                                                                                                                                                                                                                                                                                                                                                                                                                                                                                                                                                                                                                                                                               |
| $R_2^1(8)$  |  | N1-H3 <sub>(-NH3+)</sub> ···O7 <sub>(-C=O)</sub> & C5-H12 <sub>(-CH2)</sub> ···O7 <sub>(-C=O)</sub>                                                                                                                                                                                                                                                                                                                                                                                                                                                                                                                                                                                                                                                                                                                                                                                                                                                                                                                                                                                                           |
| $R_2^1(5)$  |  | *N1-H3 <sub>(-NH3+)</sub> ···O5 <sub>(-COO-)</sub> & N1-H3 <sub>(-NH3+)</sub> ···O7 <sub>(-C=O)</sub><br>*N3-H15 <sub>(-NH3+)</sub> ···O12 <sub>(-C=O)</sub> & N3-H15 <sub>(-NH3+)</sub> ···O10 <sub>(-COOH)</sub>                                                                                                                                                                                                                                                                                                                                                                                                                                                                                                                                                                                                                                                                                                                                                                                                                                                                                            |
| $R_2^2(7)$  |  | C3-H9 <sub>(-CH2)</sub> ···O7 <sub>(-C=O)</sub> & C5-H13 <sub>(-CH2)</sub> ···O11 <sub>(-COOH)</sub>                                                                                                                                                                                                                                                                                                                                                                                                                                                                                                                                                                                                                                                                                                                                                                                                                                                                                                                                                                                                          |
| $R_2^2(9)$  |  | *N1-H3 <sub>(-NH3+)</sub> ···O5 <sub>(-COO-)</sub> & C3-H9 <sub>(-CH2)</sub> ···O7 <sub>(-C=O)</sub><br>*N3-H15 <sub>(-NH3+)</sub> ···O10 <sub>(-COOH)</sub> & C8-H22 <sub>(-CH2)</sub> ···O12 <sub>(-C=O)</sub>                                                                                                                                                                                                                                                                                                                                                                                                                                                                                                                                                                                                                                                                                                                                                                                                                                                                                              |
| $R_2^2(11)$ |  | *N1-H3 <sub>(-NH3+)</sub> ···O5 <sub>(-COO-)</sub> & C5-H12 <sub>(-CH2)</sub> ···O7 <sub>(-C=O)</sub><br>*C3-H9 <sub>(-CH2)</sub> ···O7 <sub>(-C=O)</sub> & C5-H12 <sub>(-CH2)</sub> ···O9 <sub>(-COOH)</sub><br>*C8-H22 <sub>(-CH2)</sub> ···O12 <sub>(-C=O)</sub> & C10-H26 <sub>(-CH2)</sub> ···O14 <sub>(-COOH)</sub>                                                                                                                                                                                                                                                                                                                                                                                                                                                                                                                                                                                                                                                                                                                                                                                     |
| $R_2^2(13)$ |  | *N1-H3 <sub>(-NH3+)</sub> ···O7 <sub>(-C=O)</sub> & C5-H12 <sub>(-CH2)</sub> ···O9 <sub>(-COOH)</sub><br>*N3-H15 <sub>(-NH3+)</sub> ···O12 <sub>(-C=O)</sub> & C10-H26 <sub>(-CH2)</sub> ···O14 <sub>(-COOH)</sub>                                                                                                                                                                                                                                                                                                                                                                                                                                                                                                                                                                                                                                                                                                                                                                                                                                                                                            |
| $R_2^2(14)$ |  | *N1-H3 <sub>(-NH3+)</sub> ···O5 <sub>(-COO-)</sub> & C5-H12 <sub>(-CH2)</sub> ···O9 <sub>(-COOH)</sub><br>*N2-H5 <sub>(-NH3+)</sub> ···O8 <sub>(-COOH)</sub> & C2-H7 <sub>(-CH)</sub> ···O5 <sub>(-COO-)</sub><br>*N3-H15 <sub>(-NH3+)</sub> ···O10 <sub>(-COOH)</sub> & C10-H26 <sub>(-CH2)</sub> ···O14 <sub>(-COOH)</sub>                                                                                                                                                                                                                                                                                                                                                                                                                                                                                                                                                                                                                                                                                                                                                                                  |
| $R_2^2(15)$ |  | N3-H16 <sub>(-NH3+)</sub> ···O10 <sub>(-COOH)</sub> & N4-H19 <sub>(-NH3+)</sub> ···O14 <sub>(-COOH)</sub>                                                                                                                                                                                                                                                                                                                                                                                                                                                                                                                                                                                                                                                                                                                                                                                                                                                                                                                                                                                                     |
| $D_2^2(5)$  |  | *N1-H1 <sub>(-NH3+)</sub> ···O5 <sub>(-COO-)</sub> & N4-H18 <sub>(-NH3+)</sub> ···O6 <sub>(-COO-)</sub><br>*N1-H3 <sub>(-NH3+)</sub> ···O5 <sub>(-COO-)</sub> & N4-H18 <sub>(-NH3+)</sub> ···O6 <sub>(-COO-)</sub><br>*O9-H27 <sub>(COOH)</sub> ···O4 <sub>(-COO-)</sub> & N2-H4 <sub>(-NH3+)</sub> ···O3 <sub>(-COO-)</sub><br>*N2-H6 <sub>(-NH3+)</sub> ···O11 <sub>(-COOH)</sub> & N3-H14 <sub>(-NH3+)</sub> ···O10 <sub>(-COOH)</sub><br>*N4-H18 <sub>(-NH3+)</sub> ···O6 <sub>(-COO-)</sub> & C2-H7 <sub>(-CH)</sub> ···O5 <sub>(-COO-)</sub><br>*C5-H12 <sub>(-CH2)</sub> ···O7 <sub>(-C=O)</sub> & C5-H13 <sub>(-CH2)</sub> ···O1 <sub>(-COO-)</sub><br>*N4-H17 <sub>(-NH3+)</sub> ···O1 <sub>(-COO-)</sub> & N4-H18 <sub>(-NH3+)</sub> ···O6 <sub>(-COO-)</sub><br>*N4-H17 <sub>(-NH3+)</sub> ···O1 <sub>(-COO-)</sub> & N4-H19 <sub>(-NH3+)</sub> ···O14 <sub>(-COOH)</sub><br>*O13-H32 <sub>(COOH)</sub> ···O2 <sub>(-COO-)</sub> & N4-H17 <sub>(-NH3+)</sub> ···O1 <sub>(-COO-)</sub><br>*N4-H19 <sub>(-NH3+)</sub> ···O14 <sub>(-COOH)</sub> & N4-H18 <sub>(-NH3+)</sub> ···O6 <sub>(-COO-)</sub> |
| $D_2^2(6)$  |  | *N1-H3 <sub>(-NH3+)</sub> ···O7 <sub>(-C=O)</sub> & N4-H18 <sub>(-NH3+)</sub> ···O6 <sub>(-COO-)</sub><br>*N2-H5 <sub>(-NH3+)</sub> ···O8 <sub>(-COOH)</sub> & C5-H13 <sub>(-CH2)</sub> ···O11 <sub>(-COOH)</sub><br>*O13-H32 <sub>(COOH)</sub> ···O2 <sub>(-COO-)</sub> & C2-H7 <sub>(-CH)</sub> ···O5 <sub>(-COO-)</sub><br>*N4-H17 <sub>(-NH3+)</sub> ···O1 <sub>(-COO-)</sub> & C10-H26 <sub>(-CH2)</sub> ···O14 <sub>(-COOH)</sub><br>*N4-H18 <sub>(-NH3+)</sub> ···O6 <sub>(-COO-)</sub> & C10-H26 <sub>(-CH2)</sub> ···O14 <sub>(-COOH)</sub><br>*O13-H32 <sub>(COOH)</sub> ···O2 <sub>(-COO-)</sub> & N4-H19 <sub>(-NH3+)</sub> ···O14 <sub>(-COOH)</sub><br>*O13-H32 <sub>(COOH)</sub> ···O2 <sub>(-COO-)</sub> & C10-H26 <sub>(-CH2)</sub> ···O14 <sub>(-COOH)</sub>                                                                                                                                                                                                                                                                                                                                |

|             |                                                                                                                                                                                                                                                                                                                                                                                                                                                                                                                                                                                                                                                                                                                                                                                                                                                                                                                                                                                                                                                                                                                                                                                                                                                                                                                                                                                                                                                                                                                                                                                                                                                                                                                                                                                                     |
|-------------|-----------------------------------------------------------------------------------------------------------------------------------------------------------------------------------------------------------------------------------------------------------------------------------------------------------------------------------------------------------------------------------------------------------------------------------------------------------------------------------------------------------------------------------------------------------------------------------------------------------------------------------------------------------------------------------------------------------------------------------------------------------------------------------------------------------------------------------------------------------------------------------------------------------------------------------------------------------------------------------------------------------------------------------------------------------------------------------------------------------------------------------------------------------------------------------------------------------------------------------------------------------------------------------------------------------------------------------------------------------------------------------------------------------------------------------------------------------------------------------------------------------------------------------------------------------------------------------------------------------------------------------------------------------------------------------------------------------------------------------------------------------------------------------------------------|
| $D_2^2(7)$  | <p>*N1-H1<sub>(-NH3+)</sub>···O5<sub>(-COO-)</sub> &amp; N4-H17<sub>(-NH3+)</sub>···O1<sub>(-COO-)</sub><br/> *N1-H1<sub>(-NH3+)</sub>···O5<sub>(-COO-)</sub> &amp; O13-H32<sub>(COOH)</sub>···O2<sub>(-COO-)</sub><br/> *N4-H17<sub>(-NH3+)</sub>···O1<sub>(-COO-)</sub> &amp; N1-H3<sub>(-NH3+)</sub>···O5<sub>(-COO-)</sub><br/> *N1-H3<sub>(-NH3+)</sub>···O5<sub>(-COO-)</sub> &amp; O13-H32<sub>(COOH)</sub>···O2<sub>(-COO-)</sub><br/> *O9-H27<sub>(-COOH)</sub>···O4<sub>(-COO-)</sub> &amp; N3-H14<sub>(-NH3+)</sub>···O10<sub>(-COOH)</sub><br/> *O9-H27<sub>(-COOH)</sub>···O4<sub>(-COO-)</sub> &amp; N3-H15<sub>(-NH3+)</sub>···O10<sub>(-COOH)</sub><br/> *O9-H27<sub>(-COOH)</sub>···O4<sub>(-COO-)</sub> &amp; N3-H15<sub>(-NH3+)</sub>···O12<sub>(C=O)</sub><br/> *O9-H27<sub>(-COOH)</sub>···O4<sub>(-COO-)</sub> &amp; N3-H16<sub>(-NH3+)</sub>···O10<sub>(-COOH)</sub><br/> *O9-H27<sub>(-COOH)</sub>···O4<sub>(-COO-)</sub> &amp; C8-H22<sub>(-CH2)</sub>···O12<sub>(C=O)</sub></p>                                                                                                                                                                                                                                                                                                                                                                                                                                                                                                                                                                                                                                                                                                                                                                                           |
| $D_2^2(8)$  | <p>*N4-H17<sub>(-NH3+)</sub>···O1<sub>(-COO-)</sub> &amp; C8-H22<sub>(-CH2)</sub>···O12<sub>(C=O)</sub><br/> *N4-H18<sub>(-NH3+)</sub>···O6<sub>(-COO-)</sub> &amp; C8-H22<sub>(-CH2)</sub>···O12<sub>(C=O)</sub></p>                                                                                                                                                                                                                                                                                                                                                                                                                                                                                                                                                                                                                                                                                                                                                                                                                                                                                                                                                                                                                                                                                                                                                                                                                                                                                                                                                                                                                                                                                                                                                                               |
| $D_2^2(9)$  | <p>*N1-H1<sub>(-NH3+)</sub>···O5<sub>(-COO-)</sub> &amp; C5-H13<sub>(-CH2)</sub>···O11<sub>(-COOH)</sub><br/> *N1-H3<sub>(-NH3+)</sub>···O5<sub>(-COO-)</sub> &amp; C5-H13<sub>(-CH2)</sub>···O11<sub>(-COOH)</sub><br/> *O9-H27<sub>(-COOH)</sub>···O4<sub>(-COO-)</sub> &amp; N1-H3<sub>(-NH3+)</sub>···O7<sub>(C=O)</sub><br/> *N2-H4<sub>(-NH3+)</sub>···O3<sub>(-COO-)</sub> &amp; C10-H26<sub>(-CH2)</sub>···O14<sub>(-COOH)</sub><br/> *N2-H6<sub>(-NH3+)</sub>···O11<sub>(-COOH)</sub> &amp; N4-H19<sub>(-NH3+)</sub>···O14<sub>(-COOH)</sub><br/> *O9-H27<sub>(-COOH)</sub>···O4<sub>(-COO-)</sub> &amp; C3-H9<sub>(-CH2)</sub>···O7<sub>(C=O)</sub><br/> *N4-H17<sub>(-NH3+)</sub>···O1<sub>(-COO-)</sub> &amp; C5-H12<sub>(-CH2)</sub>···O7<sub>(C=O)</sub><br/> *O13-H32<sub>(-COOH)</sub>···O2<sub>(-COO-)</sub> &amp; N3-H15<sub>(-NH3+)</sub>···O12<sub>(C=O)</sub><br/> *O13-H32<sub>(-COOH)</sub>···O2<sub>(-COO-)</sub> &amp; C8-H22<sub>(-CH2)</sub>···O12<sub>(C=O)</sub><br/> *O9-H27<sub>(-COOH)</sub>···O4<sub>(-COO-)</sub> &amp; C10-H26<sub>(-CH2)</sub>···O14<sub>(-COOH)</sub></p>                                                                                                                                                                                                                                                                                                                                                                                                                                                                                                                                                                                                                                                                                      |
| $D_2^2(10)$ | <p>*N1-H1<sub>(-NH3+)</sub>···O5<sub>(-COO-)</sub> &amp; N2-H4<sub>(-NH3+)</sub>···O3<sub>(-COO-)</sub><br/> *O9-H27<sub>(-COOH)</sub>···O4<sub>(-COO-)</sub> &amp; N1-H1<sub>(-NH3+)</sub>···O5<sub>(-COO-)</sub><br/> *N1-H3<sub>(-NH3+)</sub>···O5<sub>(-COO-)</sub> &amp; N2-H4<sub>(-NH3+)</sub>···O3<sub>(-COO-)</sub><br/> *O9-H27<sub>(-COOH)</sub>···O4<sub>(-COO-)</sub> &amp; N1-H3<sub>(-NH3+)</sub>···O5<sub>(-COO-)</sub><br/> *O13-H32<sub>(-COOH)</sub>···O2<sub>(COO-)</sub> &amp; N2-H4<sub>(-NH3+)</sub>···O3<sub>(-COO-)</sub><br/> *N2-H5<sub>(-NH3+)</sub>···O8<sub>(-COOH)</sub> &amp; N4-H17<sub>(-NH3+)</sub>···O1<sub>(-COO-)</sub><br/> *N3-H14<sub>(-NH3+)</sub>···O10<sub>(-COOH)</sub> &amp; N4-H17<sub>(-NH3+)</sub>···O1<sub>(-COO-)</sub><br/> *O13-H32<sub>(-COOH)</sub>···O2<sub>(-COO-)</sub> &amp; N3-H14<sub>(-NH3+)</sub>···O10<sub>(-COOH)</sub><br/> *N3-H15<sub>(-NH3+)</sub>···O10<sub>(-COOH)</sub> &amp; N4-H18<sub>(-NH3+)</sub>···O6<sub>(-COO-)</sub><br/> *O13-H32<sub>(-COOH)</sub>···O2<sub>(-COO-)</sub> &amp; N3-H15<sub>(-NH3+)</sub>···O10<sub>(-COOH)</sub><br/> *N3-H15<sub>(-NH3+)</sub>···O12<sub>(C=O)</sub> &amp; N4-H17<sub>(-NH3+)</sub>···O1<sub>(-COO-)</sub><br/> *N3-H16<sub>(-NH3+)</sub>···O10<sub>(-COOH)</sub> &amp; N4-H17<sub>(-NH3+)</sub>···O1<sub>(-COO-)</sub><br/> *N3-H16<sub>(-NH3+)</sub>···O10<sub>(-COOH)</sub> &amp; N4-H18<sub>(-NH3+)</sub>···O6<sub>(-COO-)</sub><br/> *O13-H32<sub>(-COOH)</sub>···O2<sub>(-COO-)</sub> &amp; N3-H16<sub>(-NH3+)</sub>···O10<sub>(-COOH)</sub><br/> *O9-H27<sub>(-COOH)</sub>···O4<sub>(-COO-)</sub> &amp; N4-H17<sub>(-NH3+)</sub>···O1<sub>(-COO-)</sub><br/> *O9-H27<sub>(-COOH)</sub>···O4<sub>(-COO-)</sub> &amp; N4-H19<sub>(-NH3+)</sub>···O14<sub>(-COOH)</sub></p> |
| $D_3^2(8)$  | N1-H2 <sub>(-NH3+)</sub> ···O1 <sub>(-COO-)</sub> & (N4-H17 <sub>(-NH3+)</sub> ···O1 <sub>(-COO-)</sub> ) <sub>2</sub>                                                                                                                                                                                                                                                                                                                                                                                                                                                                                                                                                                                                                                                                                                                                                                                                                                                                                                                                                                                                                                                                                                                                                                                                                                                                                                                                                                                                                                                                                                                                                                                                                                                                              |
| $D_3^2(9)$  | <p>*(N4-H17<sub>(-NH3+)</sub>···O1<sub>(-COO-)</sub>)<sub>2</sub> &amp; C4-H10<sub>(-CH2)</sub>···O1<sub>(-COO-)</sub><br/> *(C10-H26<sub>(-CH2)</sub>···O14<sub>(-COOH)</sub>)<sub>2</sub> &amp; C19-H35<sub>(-CH2)</sub>···O13<sub>(-COOH)</sub><br/> *(O13-H32<sub>(-COOH)</sub>···O2<sub>(-COO-)</sub>)<sub>2</sub> &amp; C19-H35<sub>(-CH2)</sub>···O13<sub>(-COOH)</sub></p>                                                                                                                                                                                                                                                                                                                                                                                                                                                                                                                                                                                                                                                                                                                                                                                                                                                                                                                                                                                                                                                                                                                                                                                                                                                                                                                                                                                                                  |
| $D_3^3(9)$  | <p>*(N4-H18<sub>(-NH3+)</sub>···O14<sub>(-COOH)</sub>)<sub>2</sub> &amp; C19-H35<sub>(-CH2)</sub>···O13<sub>(-COOH)</sub><br/> *(O9-H27<sub>(-COOH)</sub>···O4<sub>(-COO-)</sub>)<sub>2</sub> &amp; C7-H20<sub>(-CH)</sub>···O3<sub>(-COO-)</sub></p>                                                                                                                                                                                                                                                                                                                                                                                                                                                                                                                                                                                                                                                                                                                                                                                                                                                                                                                                                                                                                                                                                                                                                                                                                                                                                                                                                                                                                                                                                                                                               |
| $D_3^3(10)$ | <p>*(N1-H1<sub>(-NH3+)</sub>···O5<sub>(-COO-)</sub>)<sub>2</sub> &amp; N1-H2<sub>(-NH3+)</sub>···O1<sub>(-COO-)</sub><br/> *N1-H2<sub>(-NH3+)</sub>···O1<sub>(-COO-)</sub> &amp; (C2-H7<sub>(-CH)</sub>···O5<sub>(-COO-)</sub>)<sub>2</sub><br/> *N1-H2<sub>(-NH3+)</sub>···O1<sub>(-COO-)</sub> &amp; (O13-H32<sub>(-COOH)</sub>···O2<sub>(-COO-)</sub>)<sub>2</sub></p>                                                                                                                                                                                                                                                                                                                                                                                                                                                                                                                                                                                                                                                                                                                                                                                                                                                                                                                                                                                                                                                                                                                                                                                                                                                                                                                                                                                                                           |
| $D_3^3(11)$ | <p>*C2-H7<sub>(-CH)</sub>···O5<sub>(-COO-)</sub> &amp; C4-H10<sub>(-CH2)</sub>···O1<sub>(-COO-)</sub> &amp; C2-H8<sub>(-CH)</sub>···O5<sub>(-COO-)</sub><br/> *(O13-H32<sub>(-COOH)</sub>···O2<sub>(-COO-)</sub>)<sub>2</sub> &amp; C4-H10<sub>(-CH2)</sub>···O1<sub>(-COO-)</sub><br/> *(N3-H15<sub>(-NH3+)</sub>···O10<sub>(-COOH)</sub>)<sub>2</sub> &amp; C7-H20<sub>(-CH)</sub>···O3<sub>(-COO-)</sub><br/> *(N3-H15<sub>(-NH3+)</sub>···O12<sub>(C=O)</sub>)<sub>2</sub> &amp; C7-H20<sub>(-CH)</sub>···O3<sub>(-COO-)</sub><br/> *(N3-H16<sub>(-NH3+)</sub>···O10<sub>(-COOH)</sub>)<sub>2</sub> &amp; C7-H20<sub>(-CH)</sub>···O3<sub>(-COO-)</sub><br/> *C7-H20<sub>(-CH)</sub>···O3<sub>(-COO-)</sub> &amp; C8-H22<sub>(-CH2)</sub>···O12<sub>(C=O)</sub> &amp; C8-H22<sub>(-CH2)</sub>···O12<sub>(C=O)</sub></p>                                                                                                                                                                                                                                                                                                                                                                                                                                                                                                                                                                                                                                                                                                                                                                                                                                                                                                                                                                         |
| $D_3^3(12)$ | N1-H2 <sub>(-NH3+)</sub> ···O1 <sub>(-COO-)</sub> & (C3-H9 <sub>(-CH2)</sub> ···O7 <sub>(C=O)</sub> ) <sub>2</sub>                                                                                                                                                                                                                                                                                                                                                                                                                                                                                                                                                                                                                                                                                                                                                                                                                                                                                                                                                                                                                                                                                                                                                                                                                                                                                                                                                                                                                                                                                                                                                                                                                                                                                  |
| $D_3^3(13)$ | <p>*(N1-H1<sub>(-NH3+)</sub>···O5<sub>(-COO-)</sub>)<sub>2</sub> &amp; C4-H10<sub>(-CH2)</sub>···O1<sub>(-COO-)</sub><br/> *(N1-H3<sub>(-NH3+)</sub>···O5<sub>(-COO-)</sub>)<sub>2</sub> &amp; C4-H10<sub>(-CH2)</sub>···O1<sub>(-COO-)</sub><br/> *C4-H10<sub>(-CH2)</sub>···O1<sub>(-COO-)</sub> &amp; (C5-H12<sub>(-CH2)</sub>···O7<sub>(C=O)</sub>)<sub>2</sub><br/> *(N3-H15<sub>(-NH3+)</sub>···O12<sub>(C=O)</sub>)<sub>2</sub> &amp; C19-H35<sub>(-CH2)</sub>···O13<sub>(-COOH)</sub><br/> *(C8-H22<sub>(-CH2)</sub>···O12<sub>(C=O)</sub>)<sub>2</sub> &amp; C19-H35<sub>(-CH2)</sub>···O13<sub>(-COOH)</sub></p>                                                                                                                                                                                                                                                                                                                                                                                                                                                                                                                                                                                                                                                                                                                                                                                                                                                                                                                                                                                                                                                                                                                                                                          |
| $D_3^3(15)$ | <p>*(N2-H5<sub>(-NH3+)</sub>···O8<sub>(-COOH)</sub>)<sub>2</sub> &amp; C4-H10<sub>(-CH2)</sub>···O1<sub>(-COO-)</sub><br/> *C5-H13<sub>(-CH2)</sub>···O11<sub>(-COOH)</sub> &amp; C19-H35<sub>(-CH2)</sub>···O13<sub>(-COOH)</sub><br/> *N3-H14<sub>(-NH3+)</sub>···O10<sub>(-COOH)</sub> &amp; N3-H14<sub>(-NH3+)</sub>···O10<sub>(-COOH)</sub><br/> *(N3-H15<sub>(-NH3+)</sub>···O10<sub>(-COOH)</sub>)<sub>2</sub> &amp; C19-H35<sub>(-CH2)</sub>···O13<sub>(-COOH)</sub><br/> *(N3-H16<sub>(-NH3+)</sub>···O10<sub>(-COOH)</sub>)<sub>2</sub> &amp; C19-H35<sub>(-CH2)</sub>···O13<sub>(-COOH)</sub><br/> *C7-H20<sub>(-CH)</sub>···O3<sub>(-COO-)</sub> &amp; (C10-H26<sub>(-CH2)</sub>···O14<sub>(-COOH)</sub>)<sub>2</sub></p>                                                                                                                                                                                                                                                                                                                                                                                                                                                                                                                                                                                                                                                                                                                                                                                                                                                                                                                                                                                                                                                               |
| $D_3^3(16)$ | <p>*N1-H2<sub>(-NH3+)</sub>···O1<sub>(-COO-)</sub> &amp; (C5-H12<sub>(-CH2)</sub>···O7<sub>(C=O)</sub>)<sub>2</sub><br/> *N1-H2<sub>(-NH3+)</sub>···O1<sub>(-COO-)</sub> &amp; (C5-H12<sub>(-CH2)</sub>···O9<sub>(-COOH)</sub>)<sub>2</sub></p>                                                                                                                                                                                                                                                                                                                                                                                                                                                                                                                                                                                                                                                                                                                                                                                                                                                                                                                                                                                                                                                                                                                                                                                                                                                                                                                                                                                                                                                                                                                                                     |

|               |             |                                                                                                                                                                                                                                                                                                                                                                                                                                                                                                                                                                                                                                                                                                   |
|---------------|-------------|---------------------------------------------------------------------------------------------------------------------------------------------------------------------------------------------------------------------------------------------------------------------------------------------------------------------------------------------------------------------------------------------------------------------------------------------------------------------------------------------------------------------------------------------------------------------------------------------------------------------------------------------------------------------------------------------------|
|               | $D_3^3(17)$ | * $(N4-H17_{(-NH3+)} \cdots O1_{(-COO-)})_2$ & $C7-H20_{(-CH)} \cdots O3_{(-COO-)}$<br>* $(N4-H13_{(-NH3+)} \cdots O6_{(-COO-)})_2$ & $C7-H20_{(-CH)} \cdots O3_{(-COO-)}$<br>* $(N4-H19_{(-NH3+)} \cdots O14)_2$ & $C7-H20_{(-CH)} \cdots O3_{(-COO-)}$                                                                                                                                                                                                                                                                                                                                                                                                                                          |
|               | $D_3^3(18)$ | $N1-H2_{(-NH3+)} \cdots O1_{(-COO-)}$ & $(N2-H4_{(-NH3+)} \cdots O3_{(-COO-)})_2$                                                                                                                                                                                                                                                                                                                                                                                                                                                                                                                                                                                                                 |
| <b>PUYVUA</b> | $S(6)$      | $C4-H10_{(CH2)} \cdots O2_{(COO-)}$ ornithine                                                                                                                                                                                                                                                                                                                                                                                                                                                                                                                                                                                                                                                     |
|               | $C(5)$      | $N1-H2_{(NH3+)} \cdots O2_{(COO-)}$ ornithine                                                                                                                                                                                                                                                                                                                                                                                                                                                                                                                                                                                                                                                     |
|               | $C(6)$      | $C4-H10_{(CH2)} \cdots O1_{(COO-)}$ ornithine                                                                                                                                                                                                                                                                                                                                                                                                                                                                                                                                                                                                                                                     |
|               | $C(8)$      | $N2-H9_{(NH3+)} \cdots O1_{(COO-)}$ ornithine                                                                                                                                                                                                                                                                                                                                                                                                                                                                                                                                                                                                                                                     |
|               | $D(2)$      | * $N1-H3_{(NH3+)} \cdots O3_{(NO3-)}$<br>* $N2-H7_{(NH3+)} \cdots O4_{(NO3-)}$<br>* $C5-H12_{(CH2)} \cdots O5_{(NO3-)}$                                                                                                                                                                                                                                                                                                                                                                                                                                                                                                                                                                           |
| level 2       | $C_2^1(4)$  | $N1-H4_{(NH3+)} \cdots O2_{(COO-)}$ ornithine & $N1-H2_{(NH3+)} \cdots O2_{(COO-)}$ ornithine                                                                                                                                                                                                                                                                                                                                                                                                                                                                                                                                                                                                     |
|               | $C_2^1(5)$  | $N2-H8_{(NH3+)} \cdots O5_{(NO3-)}$ & $C5-H12_{(CH2)} \cdots O5_{(NO3-)}$                                                                                                                                                                                                                                                                                                                                                                                                                                                                                                                                                                                                                         |
|               | $C_2^2(6)$  | $N2-H7_{(NH3+)} \cdots O4_{(NO3-)}$ & $N2-H8_{(NH3+)} \cdots O5_{(NO3-)}$                                                                                                                                                                                                                                                                                                                                                                                                                                                                                                                                                                                                                         |
|               | $C_2^2(7)$  | $N2-H7_{(NH3+)} \cdots O4_{(NO3-)}$ & $C5-H12_{(CH2)} \cdots O5_{(NO3-)}$                                                                                                                                                                                                                                                                                                                                                                                                                                                                                                                                                                                                                         |
|               | $C_2^2(9)$  | $N1-H2_{(NH3+)} \cdots O2_{(COO-)}$ ornithine & $C4-H10_{(CH2)} \cdots O1_{(COO-)}$ ornithine                                                                                                                                                                                                                                                                                                                                                                                                                                                                                                                                                                                                     |
|               | $C_2^2(10)$ | * $N1-H4_{(NH3+)} \cdots O2_{(COO-)}$ ornithine & $N1-H2_{(NH3+)} \cdots O2_{(COO-)}$ ornithine<br>* $N1-H3_{(NH3+)} \cdots O3_{(NO3-)}$ & $C5-H12_{(CH2)} \cdots O5_{(NO3-)}$                                                                                                                                                                                                                                                                                                                                                                                                                                                                                                                    |
|               | $C_2^2(11)$ | * $N1-H2_{(NH3+)} \cdots O2_{(COO-)}$ ornithine & $N2-H9_{(NH3+)} \cdots O1_{(COO-)}$ ornithine<br>* $N1-H3_{(NH3+)} \cdots O3_{(NO3-)}$ & $N2-H7_{(NH3+)} \cdots O4_{(NO3-)}$<br>* $N1-H4_{(NH3+)} \cdots O2_{(COO-)}$ ornithine & $C4-H10_{(CH2)} \cdots O1_{(COO-)}$ ornithine                                                                                                                                                                                                                                                                                                                                                                                                                 |
|               | $C_2^2(13)$ | $N1-H4_{(NH3+)} \cdots O2_{(COO-)}$ ornithine & $N2-H9_{(NH3+)} \cdots O1_{(COO-)}$ ornithine                                                                                                                                                                                                                                                                                                                                                                                                                                                                                                                                                                                                     |
|               | $C_2^2(14)$ | $N2-H9_{(NH3+)} \cdots O1_{(COO-)}$ ornithine & $C4-H10_{(CH2)} \cdots O1_{(COO-)}$ ornithine                                                                                                                                                                                                                                                                                                                                                                                                                                                                                                                                                                                                     |
|               | $C_4^3(14)$ | $(N1-H4_{(NH3+)} \cdots O2_{(COO-)})_2$ ornithine & $(N1-H2_{(NH3+)} \cdots O2_{(COO-)})_2$ ornithine                                                                                                                                                                                                                                                                                                                                                                                                                                                                                                                                                                                             |
|               | $C_4^4(20)$ | $(N1-H4_{(NH3+)} \cdots O2_{(COO-)})_2$ ornithine & $(C4-H10_{(CH2)} \cdots O1_{(COO-)})_2$ ornithine                                                                                                                                                                                                                                                                                                                                                                                                                                                                                                                                                                                             |
|               | $R_2^1(6)$  | $N2-H9_{(NH3+)} \cdots O1_{(COO-)}$ ornithine & $C4-H10_{(CH2)} \cdots O1_{(COO-)}$ ornithine                                                                                                                                                                                                                                                                                                                                                                                                                                                                                                                                                                                                     |
|               | $R_2^2(11)$ | $N1-H2_{(NH3+)} \cdots O2_{(COO-)}$ ornithine & $C4-H10_{(CH2)} \cdots O1_{(COO-)}$ ornithine                                                                                                                                                                                                                                                                                                                                                                                                                                                                                                                                                                                                     |
|               | $R_2^2(13)$ | $N1-H2_{(NH3+)} \cdots O2_{(COO-)}$ ornithine & $N2-H9_{(NH3+)} \cdots O1_{(COO-)}$ ornithine                                                                                                                                                                                                                                                                                                                                                                                                                                                                                                                                                                                                     |
|               | $R_4^3(14)$ | $(N1-H4_{(NH3+)} \cdots O2_{(COO-)})_2$ ornithine & $(N1-H2_{(NH3+)} \cdots O2_{(COO-)})_2$ ornithine                                                                                                                                                                                                                                                                                                                                                                                                                                                                                                                                                                                             |
|               | $R_4^4(20)$ | $(N1-H4_{(NH3+)} \cdots O2_{(COO-)})_2$ ornithine & $(C4-H10_{(CH2)} \cdots O1_{(COO-)})_2$ ornithine                                                                                                                                                                                                                                                                                                                                                                                                                                                                                                                                                                                             |
|               | $D_3^3(10)$ | $(N1-H3_{(NH3+)} \cdots O3_{(NO3-)})_2$ & $N1-H2 \cdots O2_{(COO-)}$ ornithine                                                                                                                                                                                                                                                                                                                                                                                                                                                                                                                                                                                                                    |
|               | $D_3^3(13)$ | * $(N2-H8_{(NH3+)} \cdots O5_{(NO3-)})_2$ & $N2-H9_{(NH3+)} \cdots O1_{(COO-)}$ ornithine<br>* $(N1-H3_{(NH3+)} \cdots O3_{(NO3-)})_2$ & $C4-H10_{(CH2)} \cdots O1_{(COO-)}$ ornithine<br>* $C4-H10_{(CH2)} \cdots O1_{(COO-)}$ ornithine & $(C5-H12_{(CH2)} \cdots O5_{(NO3-)})_2$ ornithine                                                                                                                                                                                                                                                                                                                                                                                                     |
|               | $D_3^3(15)$ | * $(N1-H3_{(NH3+)} \cdots O3_{(NO3-)})_2$ & $N2-H9_{(NH3+)} \cdots O1_{(COO-)}$ ornithine<br>* $(N2-H7_{(NH3+)} \cdots O4_{(NO3-)})_2$ & $C4-H10_{(CH2)} \cdots O1_{(COO-)}$ ornithine                                                                                                                                                                                                                                                                                                                                                                                                                                                                                                            |
|               | $D_3^3(16)$ | * $(N2-H7_{(NH3+)} \cdots O4_{(NO3-)})_2$ & $N2-H9_{(NH3+)} \cdots O1_{(COO-)}$ ornithine<br>* $N1-H2_{(NH3+)} \cdots O2_{(COO-)}$ ornithine & $(C5-H12_{(CH2)} \cdots O5_{(NO3-)})_2$                                                                                                                                                                                                                                                                                                                                                                                                                                                                                                            |
|               | $D_3^3(18)$ | $N1-H2_{(NH3+)} \cdots O2_{(COO-)}$ ornithine & $(N2-H7_{(NH3+)} \cdots O4_{(NO3-)})_2$                                                                                                                                                                                                                                                                                                                                                                                                                                                                                                                                                                                                           |
|               | $D_3^3(16)$ | $N1-H2_{(NH3+)} \cdots O2_{(COO-)}$ ornithine & $(C5-H12_{(CH2)} \cdots O5_{(NO3-)})_2$                                                                                                                                                                                                                                                                                                                                                                                                                                                                                                                                                                                                           |
| <b>TEHMIA</b> | $D(2)$      | * $O16_{(COOH)}-H3 \cdots O13_{(NO2)}$<br>* $C14-H6_{(CH)} \cdots O13_{(NO2)}$<br>* $C14-H18_{(CH)} \cdots O8_{(C=Oarom.)}$<br>* $N7-H7_{(NH3+)} \cdots O1_{(C=Oarom.)}$<br>* $N7-H8_{(NH3+)} \cdots O14_{(NO2)}$<br>* $C15-H9_{(CH2)} \cdots O11_{(NO2)}$<br>* $C15-H10_{(CH2)} \cdots O4_{(NO2)}$<br>* $C16-H11_{(CH2)} \cdots O4_{(NO2)}$<br>* $C14-H12_{(CH)} \cdots O11_{(NO2)}$<br>* $C17-H13_{(CH2)} \cdots O12_{(NO2)}$<br>* $C17-H14_{(CH2)} \cdots O4_{(NO2)}$<br>* $N8-H15_{(NH3+)} \cdots O1_{(C=Oarom.)}$<br>* $N8-H16_{(NH3+)} \cdots O9_{(NO2)}$<br>* $N8-H16_{(NH3+)} \cdots O10_{(NO2)}$<br>* $N8-H17_{(NH3+)} \cdots O8_{(C=Oarom.)}$<br>* $N8-H17_{(NH3+)} \cdots O14_{(NO2)}$ |
| level 2       | $C_2^1(8)$  | $N7-H18_{(NH3+)} \cdots O8_{(C=Oarom.)}$ & $N8-H17_{(NH3+)} \cdots O8_{(C=Oarom.)}$                                                                                                                                                                                                                                                                                                                                                                                                                                                                                                                                                                                                               |
|               | $C_2^1(9)$  | * $N7-H7_{(NH3+)} \cdots O1_{(C=Oarom.)}$ & $N8-H15_{(NH3+)} \cdots O1_{(C=Oarom.)}$<br>* $N7-H8_{(NH3+)} \cdots O14_{(NO2)}$ & $N8-H17_{(NH3+)} \cdots O14_{(NO2)}$                                                                                                                                                                                                                                                                                                                                                                                                                                                                                                                              |
|               | $C_2^2(7)$  | $O16-H5_{(COOH)} \cdots O13_{(NO2)}$ & $N7-H7_{(NH3+)} \cdots O14_{(NO2)}$                                                                                                                                                                                                                                                                                                                                                                                                                                                                                                                                                                                                                        |
|               | $C_2^2(8)$  | * $O16-H5_{(COOH)} \cdots O13_{(NO2)}$ & $N8-H17_{(NH3+)} \cdots O8_{(C=Oarom.)}$<br>* $N7-H18_{(NH3+)} \cdots O8_{(C=Oarom.)}$ & $N7-H8_{(NH3+)} \cdots O14_{(NO2)}$<br>* $N8-H16_{(NH3+)} \cdots O9_{(NO2)}$ & $N8-H17_{(NH3+)} \cdots O8_{(C=Oarom.)}$<br>* $N8-H16_{(NH3+)} \cdots O10_{(NO2)}$ & $N8-H17_{(NH3+)} \cdots O8_{(C=Oarom.)}$                                                                                                                                                                                                                                                                                                                                                    |
|               | $C_2^2(9)$  | $O16-H5_{(COOH)} \cdots O13_{(NO2)}$ & $N7-H7_{(NH3+)} \cdots O14_{(NO2)}$                                                                                                                                                                                                                                                                                                                                                                                                                                                                                                                                                                                                                        |

|             |                                                                                                                                                                                                                                                                                                                                                                                                                                                                                                                                                                                                                                                                                                                                                                                                                                                                                                                                                                                                                                                                                                                                                                                                                                                                                                                                                                                                                                                                                                                                                                                                                                                       |
|-------------|-------------------------------------------------------------------------------------------------------------------------------------------------------------------------------------------------------------------------------------------------------------------------------------------------------------------------------------------------------------------------------------------------------------------------------------------------------------------------------------------------------------------------------------------------------------------------------------------------------------------------------------------------------------------------------------------------------------------------------------------------------------------------------------------------------------------------------------------------------------------------------------------------------------------------------------------------------------------------------------------------------------------------------------------------------------------------------------------------------------------------------------------------------------------------------------------------------------------------------------------------------------------------------------------------------------------------------------------------------------------------------------------------------------------------------------------------------------------------------------------------------------------------------------------------------------------------------------------------------------------------------------------------------|
| $C_2^2(10)$ | <p>*O16-H5<sub>(COOH)</sub>···O13<sub>(NO2)</sub> &amp; N7-H18<sub>(NH3+)</sub>···O8<sub>(C=Oarom.)</sub><br/> *N8-H17<sub>(NH3+)</sub>···O14<sub>(NO2)</sub> &amp; O16-H5<sub>(COOH)</sub>···O13<sub>(NO2)</sub><br/> *N8-H16<sub>(NH3+)</sub>···O9<sub>(NO2)</sub> &amp; N8-H17<sub>(NH3+)</sub>···O14<sub>(NO2)</sub><br/> *N8-H16<sub>(NH3+)</sub>···O10<sub>(NO2)</sub> &amp; N8-H17<sub>(NH3+)</sub>···O14<sub>(NO2)</sub></p>                                                                                                                                                                                                                                                                                                                                                                                                                                                                                                                                                                                                                                                                                                                                                                                                                                                                                                                                                                                                                                                                                                                                                                                                                  |
| $C_2^2(11)$ | <p>*O16-H5<sub>(COOH)</sub>···O13<sub>(NO2)</sub> &amp; C15-H9<sub>(CH2)</sub>···C11<sub>(CHarom.)</sub><br/> *N7-H18<sub>(NH3+)</sub>···O8<sub>(C=Oarom.)</sub> &amp; C15-H9<sub>(CH2)</sub>···O11<sub>(NO2)</sub><br/> *N8-H16<sub>(NH3+)</sub>···O9<sub>(NO2)</sub> &amp; C17-H13<sub>(CH2)</sub>···O12<sub>(NO2)</sub><br/> *N8-H16<sub>(NH3+)</sub>···O10<sub>(NO2)</sub> &amp; C17-H13<sub>(CH2)</sub>···O12<sub>(NO2)</sub><br/> *N8-H17<sub>(NH3+)</sub>···O8<sub>(C=Oarom.)</sub> &amp; C17-H13<sub>(CH2)</sub>···O12<sub>(NO2)</sub><br/> *N8-H17<sub>(NH3+)</sub>···O14<sub>(NO2)</sub> &amp; C17-H13<sub>(CH2)</sub>···O12<sub>(NO2)</sub><br/> *N8-H15<sub>(NH3+)</sub>···O1<sub>(C=Oarom.)</sub> &amp; C17-H14<sub>(CH2)</sub>···O4<sub>(NO2)</sub></p>                                                                                                                                                                                                                                                                                                                                                                                                                                                                                                                                                                                                                                                                                                                                                                                                                                                                                 |
| $C_2^2(12)$ | <p>*O16-H5<sub>(COOH)</sub>···O13<sub>(NO2)</sub> &amp; N8-H17<sub>(NH3+)</sub>···O8<sub>(C=Oarom.)</sub><br/> *O16-H5<sub>(COOH)</sub>···O13<sub>(NO2)</sub> &amp; C16-H12<sub>(CH2)</sub>···O11<sub>(NO2)</sub><br/> *N8-H17<sub>(NH3+)</sub>···O8<sub>(C=Oarom.)</sub> &amp; C14-H6<sub>(CH)</sub>···O13<sub>(NO2)</sub><br/> *N7-H18<sub>(NH3+)</sub>···O8<sub>(C=Oarom.)</sub> &amp; C16-H12<sub>(CH2)</sub>···O11<sub>(NO2)</sub><br/> *N7-H18<sub>(NH3+)</sub>···O8<sub>(C=Oarom.)</sub> &amp; N8-H16<sub>(NH3+)</sub>···O9<sub>(NO2)</sub><br/> *N7-H18<sub>(NH3+)</sub>···O8<sub>(C=Oarom.)</sub> &amp; N8-H16<sub>(NH3+)</sub>···O10<sub>(NO2)</sub><br/> *N8-H17<sub>(NH3+)</sub>···O8<sub>(C=Oarom.)</sub> &amp; N7-H18<sub>(NH3+)</sub>···O8<sub>(C=Oarom.)</sub><br/> *N7-H7<sub>(NH3+)</sub>···O1<sub>(C=Oarom.)</sub> &amp; C15-H10<sub>(CH2)</sub>···O4<sub>(NO2)</sub><br/> *N7-H7<sub>(NH3+)</sub>···O2<sub>(NO2)</sub> &amp; C15-H10<sub>(CH2)</sub>···O4<sub>(NO2)</sub><br/> *N7-H8<sub>(NH3+)</sub>···O14<sub>(NO2)</sub> &amp; C15-H9<sub>(CH2)</sub>···O11<sub>(NO2)</sub><br/> *N8-H15<sub>(NH3+)</sub>···O1<sub>(C=Oarom.)</sub> &amp; C16-H11<sub>(CH2)</sub>···O4<sub>(NO2)</sub><br/> *N8-H16<sub>(NH3+)</sub>···O9<sub>(NO2)</sub> &amp; C16-H12<sub>(CH2)</sub>···O11<sub>(NO2)</sub><br/> *N8-H16<sub>(NH3+)</sub>···O10<sub>(NO2)</sub> &amp; C16-H12<sub>(CH2)</sub>···O11<sub>(NO2)</sub><br/> *N8-H17<sub>(NH3+)</sub>···O8<sub>(C=Oarom.)</sub> &amp; C16-H12<sub>(CH2)</sub>···O11<sub>(NO2)</sub><br/> *N8-H17<sub>(NH3+)</sub>···O14<sub>(NO2)</sub> &amp; C16-H12<sub>(CH2)</sub>···O11<sub>(NO2)</sub></p> |
| $C_2^2(13)$ | <p>*O16-H5<sub>(COOH)</sub>···O13<sub>(NO2)</sub> &amp; C15-H9<sub>(CH2)</sub>···O11<sub>(NO2)</sub><br/> *O16-H5<sub>(COOH)</sub>···O13<sub>(NO2)</sub> &amp; C17-H13<sub>(CH2)</sub>···O12<sub>(NO2)</sub><br/> *N7-H18<sub>(NH3+)</sub>···O8<sub>(C=Oarom.)</sub> &amp; C17-H13<sub>(CH2)</sub>···O12<sub>(NO2)</sub><br/> *N7-H7<sub>(NH3+)</sub>···O1<sub>(C=Oarom.)</sub> &amp; C16-H11<sub>(CH2)</sub>···O4<sub>(NO2)</sub><br/> *N7-H7<sub>(NH3+)</sub>···O2<sub>(NO2)</sub> &amp; C16-H11<sub>(CH2)</sub>···O4<sub>(NO2)</sub><br/> *N7-H7<sub>(NH3+)</sub>···O2<sub>(NO2)</sub> &amp; N8-H15<sub>(NH3+)</sub>···O1<sub>(C=Oarom.)</sub><br/> *N7-H8<sub>(NH3+)</sub>···O14<sub>(NO2)</sub> &amp; C16-H12<sub>(CH2)</sub>···O11<sub>(NO2)</sub><br/> *N7-H8<sub>(NH3+)</sub>···O14<sub>(NO2)</sub> &amp; N8-H17<sub>(NH3+)</sub>···O8<sub>(C=Oarom.)</sub><br/> *N8-H16<sub>(NH3+)</sub>···O9<sub>(NO2)</sub> &amp; C15-H9<sub>(CH2)</sub>···O11<sub>(NO2)</sub><br/> *N8-H16<sub>(NH3+)</sub>···O10<sub>(NO2)</sub> &amp; C15-H9<sub>(CH2)</sub>···O11<sub>(NO2)</sub><br/> *N8-H17<sub>(NH3+)</sub>···O8<sub>(C=Oarom.)</sub> &amp; C15-H9<sub>(CH2)</sub>···O11<sub>(NO2)</sub><br/> *N8-H17<sub>(NH3+)</sub>···O14<sub>(NO2)</sub> &amp; C15-H9<sub>(CH2)</sub>···O11<sub>(NO2)</sub><br/> *N8-H15<sub>(NH3+)</sub>···O1<sub>(C=Oarom.)</sub> &amp; C15-H10<sub>(CH2)</sub>···O4<sub>(NO2)</sub></p>                                                                                                                                                                                                                                     |
| $C_2^2(14)$ | <p>*O16-H5<sub>(COOH)</sub>···O13<sub>(NO2)</sub> &amp; C16-H12<sub>(CH2)</sub>···O11<sub>(NO2)</sub><br/> *O16-H5<sub>(COOH)</sub>···O13<sub>(NO2)</sub> &amp; N8-H17<sub>(NH3+)</sub>···O8<sub>(C=Oarom.)</sub><br/> *O16-H5<sub>(COOH)</sub>···O13<sub>(NO2)</sub> &amp; N8-H16<sub>(NH3+)</sub>···O9<sub>(NO2)</sub><br/> *O16-H5<sub>(COOH)</sub>···O13<sub>(NO2)</sub> &amp; N8-H16<sub>(NH3+)</sub>···O10<sub>(NO2)</sub><br/> *N7-H7<sub>(NH3+)</sub>···O1<sub>(C=Oarom.)</sub> &amp; C17-H14<sub>(CH2)</sub>···O4<sub>(NO2)</sub><br/> *N7-H7<sub>(NH3+)</sub>···O2<sub>(NO2)</sub> &amp; C17-H14<sub>(CH2)</sub>···O4<sub>(NO2)</sub><br/> *N7-H8<sub>(NH3+)</sub>···O14<sub>(NO2)</sub> &amp; C17-H13<sub>(CH2)</sub>···O12<sub>(NO2)</sub></p>                                                                                                                                                                                                                                                                                                                                                                                                                                                                                                                                                                                                                                                                                                                                                                                                                                                                                            |
| $C_2^2(15)$ | <p>*O16-H5<sub>(COOH)</sub>···O13<sub>(NO2)</sub> &amp; C17-H13<sub>(CH2)</sub>···O12<sub>(NO2)</sub><br/> *N7-H8<sub>(NH3+)</sub>···O14<sub>(NO2)</sub> &amp; N8-H16<sub>(NH3+)</sub>···O9<sub>(NO2)</sub><br/> *N7-H8<sub>(NH3+)</sub>···O14<sub>(NO2)</sub> &amp; N8-H16<sub>(NH3+)</sub>···O10<sub>(NO2)</sub></p>                                                                                                                                                                                                                                                                                                                                                                                                                                                                                                                                                                                                                                                                                                                                                                                                                                                                                                                                                                                                                                                                                                                                                                                                                                                                                                                                |
| $C_2^2(16)$ | <p>*O16-H5<sub>(COOH)</sub>···O13<sub>(NO2)</sub> &amp; N8-H16<sub>(NH3+)</sub>···O9<sub>(NO2)</sub><br/> *O16-H5<sub>(COOH)</sub>···O13<sub>(NO2)</sub> &amp; N8-H16<sub>(NH3+)</sub>···O10<sub>(NO2)</sub></p>                                                                                                                                                                                                                                                                                                                                                                                                                                                                                                                                                                                                                                                                                                                                                                                                                                                                                                                                                                                                                                                                                                                                                                                                                                                                                                                                                                                                                                      |
| $R_2^1(5)$  | <p>*C15-H9<sub>(CH2)</sub>···O11<sub>(NO2)</sub> &amp; C16-H12<sub>(CH2)</sub>···O11<sub>(NO2)</sub><br/> *C15-H10<sub>(CH2)</sub>···O4<sub>(NO2)</sub> &amp; C16-H11<sub>(CH2)</sub>···O4<sub>(NO2)</sub><br/> *C16-H11<sub>(CH2)</sub>···O4<sub>(NO2)</sub> &amp; C17-H14<sub>(CH2)</sub>···O4<sub>(NO2)</sub></p>                                                                                                                                                                                                                                                                                                                                                                                                                                                                                                                                                                                                                                                                                                                                                                                                                                                                                                                                                                                                                                                                                                                                                                                                                                                                                                                                  |
| $R_2^1(6)$  | <p>*O16-H5<sub>(COOH)</sub>···O13<sub>(NO2)</sub> &amp; C14-H6<sub>(CH)</sub>···O13<sub>(NO2)</sub><br/> *C15-H10<sub>(CH2)</sub>···O4<sub>(NO2)</sub> &amp; C17-H14<sub>(CH2)</sub>···O4<sub>(NO2)</sub></p>                                                                                                                                                                                                                                                                                                                                                                                                                                                                                                                                                                                                                                                                                                                                                                                                                                                                                                                                                                                                                                                                                                                                                                                                                                                                                                                                                                                                                                         |
| $R_2^1(4)$  | N8-H16 <sub>(NH3+)</sub> ···O10 <sub>(NO2)</sub> & N8-H16 <sub>(NH3+)</sub> ···O9 <sub>(NO2)</sub>                                                                                                                                                                                                                                                                                                                                                                                                                                                                                                                                                                                                                                                                                                                                                                                                                                                                                                                                                                                                                                                                                                                                                                                                                                                                                                                                                                                                                                                                                                                                                    |
| $R_2^1(6)$  | <p>*N7-H7<sub>(NH3+)</sub>···O1<sub>(C=Oarom.)</sub> &amp; N7-H7<sub>(NH3+)</sub>···O2<sub>(NO2)</sub><br/> *N8-H17<sub>(NH3+)</sub>···O8<sub>(C=Oarom.)</sub> &amp; N8-H17<sub>(NH3+)</sub>···O14<sub>(NO2)</sub></p>                                                                                                                                                                                                                                                                                                                                                                                                                                                                                                                                                                                                                                                                                                                                                                                                                                                                                                                                                                                                                                                                                                                                                                                                                                                                                                                                                                                                                                |
| $R_2^2(7)$  | C16-H12 <sub>(CH2)</sub> ···O11 <sub>(NO2)</sub> & C17-H13 <sub>(CH2)</sub> ···O12 <sub>(NO2)</sub>                                                                                                                                                                                                                                                                                                                                                                                                                                                                                                                                                                                                                                                                                                                                                                                                                                                                                                                                                                                                                                                                                                                                                                                                                                                                                                                                                                                                                                                                                                                                                   |
| $R_2^2(8)$  | C15-H9 <sub>(CH2)</sub> ···O11 <sub>(NO2)</sub> & C17-H13 <sub>(CH2)</sub> ···O12 <sub>(NO2)</sub>                                                                                                                                                                                                                                                                                                                                                                                                                                                                                                                                                                                                                                                                                                                                                                                                                                                                                                                                                                                                                                                                                                                                                                                                                                                                                                                                                                                                                                                                                                                                                    |
| $D_2^2(5)$  | <p>*N7-H7<sub>(NH3+)</sub>···O2<sub>(NO2)</sub> &amp; C11-H4<sub>(CHarom.)</sub>···O3<sub>(NO2)</sub><br/> *N7-H7<sub>(NH3+)</sub>···O1<sub>(C=Oarom.)</sub> &amp; N7-H18<sub>(NH3+)</sub>···O8<sub>(C=Oarom.)</sub><br/> *N7-H7<sub>(NH3+)</sub>···O2<sub>(NO2)</sub> &amp; N7-H18<sub>(NH3+)</sub>···O8<sub>(C=Oarom.)</sub><br/> *N7-H7<sub>(NH3+)</sub>···O1<sub>(C=Oarom.)</sub> &amp; N7-H8<sub>(NH3+)</sub>···O14<sub>(NO2)</sub><br/> *N7-H7<sub>(NH3+)</sub>···O2<sub>(NO2)</sub> &amp; N8-H17<sub>(NH3+)</sub>···O14<sub>(NO2)</sub></p>                                                                                                                                                                                                                                                                                                                                                                                                                                                                                                                                                                                                                                                                                                                                                                                                                                                                                                                                                                                                                                                                                                    |



|  |            |                                                                                                                                                                                                                                                                                                                                                                                                                                                                                                                                                                                                                                                                                                                                                                                                                                                                                                                                                                                                                                                                                                                                                                                                                                                                                                                                                                                                                                                                                                                                                                                                                                                                                                                                                                                                                                                                                                                                                                                                                                                                                                                                                                                                                                                                                                                                                                                                                                                                                                                                                                                                                                                                                                                                                           |
|--|------------|-----------------------------------------------------------------------------------------------------------------------------------------------------------------------------------------------------------------------------------------------------------------------------------------------------------------------------------------------------------------------------------------------------------------------------------------------------------------------------------------------------------------------------------------------------------------------------------------------------------------------------------------------------------------------------------------------------------------------------------------------------------------------------------------------------------------------------------------------------------------------------------------------------------------------------------------------------------------------------------------------------------------------------------------------------------------------------------------------------------------------------------------------------------------------------------------------------------------------------------------------------------------------------------------------------------------------------------------------------------------------------------------------------------------------------------------------------------------------------------------------------------------------------------------------------------------------------------------------------------------------------------------------------------------------------------------------------------------------------------------------------------------------------------------------------------------------------------------------------------------------------------------------------------------------------------------------------------------------------------------------------------------------------------------------------------------------------------------------------------------------------------------------------------------------------------------------------------------------------------------------------------------------------------------------------------------------------------------------------------------------------------------------------------------------------------------------------------------------------------------------------------------------------------------------------------------------------------------------------------------------------------------------------------------------------------------------------------------------------------------------------------|
|  |            | <p>*C15-H10<sub>(CH2)</sub>···O4<sub>(NO2)</sub> &amp; C15-H9<sub>(CH2)</sub>···O11<sub>(NO2)</sub><br/>           *C16-H11<sub>(CH2)</sub>···O4<sub>(NO2)</sub> &amp; C16-H12<sub>(CH2)</sub>···O11<sub>(NO2)</sub><br/>           *C17-H13<sub>(CH2)</sub>···O12<sub>(NO2)</sub> &amp; C17-H14<sub>(CH2)</sub>···O4<sub>(NO2)</sub><br/>           *N8-H15<sub>(NH3+)</sub>···O1<sub>(C=Oarom.)</sub> &amp; N8-H16<sub>(NH3+)</sub>···O9<sub>(NO2)</sub><br/>           *N8-H15<sub>(NH3+)</sub>···O1<sub>(C=Oarom.)</sub> &amp; N8-H16<sub>(NH3+)</sub>···O10<sub>(NO2)</sub><br/>           *N8-H15<sub>(NH3+)</sub>···O1<sub>(C=Oarom.)</sub> &amp; N8-H17<sub>(NH3+)</sub>···O8<sub>(C=Oarom.)</sub><br/>           *N8-H15<sub>(NH3+)</sub>···O1<sub>(C=Oarom.)</sub> &amp; N8-H17<sub>(NH3+)</sub>···O14<sub>(NO2)</sub></p>                                                                                                                                                                                                                                                                                                                                                                                                                                                                                                                                                                                                                                                                                                                                                                                                                                                                                                                                                                                                                                                                                                                                                                                                                                                                                                                                                                                                                                                                                                                                                                                                                                                                                                                                                                                                                                                                                                                      |
|  | $D_2^2(6)$ | <p>*O16-H5<sub>(COOH)</sub>···O13<sub>(NO2)</sub> &amp; N7-H7<sub>(NH3+)</sub>···O1<sub>(C=Oarom.)</sub><br/>           *O16-H5<sub>(COOH)</sub>···O13<sub>(NO2)</sub> &amp; N7-H7<sub>(NH3+)</sub>···O2<sub>(NO2)</sub><br/>           *O16-H5<sub>(COOH)</sub>···O13<sub>(NO2)</sub> &amp; C15-H10<sub>(CH2)</sub>···O4<sub>(NO2)</sub><br/>           *N7-H18<sub>(NH3+)</sub>···O2<sub>(NO2)</sub> &amp; C15-H10<sub>(CH2)</sub>···O4<sub>(NO2)</sub><br/>           *C15-H9<sub>(CH2)</sub>···O11<sub>(NO2)</sub> &amp; C16-H11<sub>(CH2)</sub>···O4<sub>(NO2)</sub><br/>           *C15-H10<sub>(CH2)</sub>···O4<sub>(NO2)</sub> &amp; C16-H12<sub>(CH2)</sub>···O11<sub>(NO2)</sub><br/>           *C16-H11<sub>(CH2)</sub>···O4<sub>(NO2)</sub> &amp; C17-H13<sub>(CH2)</sub>···O12<sub>(NO2)</sub><br/>           *C16-H12<sub>(CH2)</sub>···O11<sub>(NO2)</sub> &amp; C17-H14<sub>(CH2)</sub>···O4<sub>(NO2)</sub><br/>           *N8-H15<sub>(NH3+)</sub>···O1<sub>(C=Oarom.)</sub> &amp; C17-H13<sub>(CH2)</sub>···O12<sub>(NO2)</sub><br/>           *N8-H16<sub>(NH3+)</sub>···O9<sub>(NO2)</sub> &amp; C17-H14<sub>(CH2)</sub>···O4<sub>(NO2)</sub><br/>           *N8-H16<sub>(NH3+)</sub>···O10<sub>(NO2)</sub> &amp; C17-H14<sub>(CH2)</sub>···O4<sub>(NO2)</sub><br/>           *N8-H17<sub>(NH3+)</sub>···O8<sub>(C=Oarom.)</sub> &amp; C17-H14<sub>(CH2)</sub>···O4<sub>(NO2)</sub><br/>           *N8-H17<sub>(NH3+)</sub>···O14<sub>(NO2)</sub> &amp; C17-H14<sub>(CH2)</sub>···O4<sub>(NO2)</sub></p>                                                                                                                                                                                                                                                                                                                                                                                                                                                                                                                                                                                                                                                                                                                                                                                                                                                                                                                                                                                                                                                                                                                                                                                                                             |
|  | $D_2^2(7)$ | <p>*O16-H5<sub>(COOH)</sub>···O13<sub>(NO2)</sub> &amp; C11-H14<sub>(CHarom.)</sub>···O3<sub>(NO2)</sub><br/>           *C11-H4<sub>(CHarom.)</sub>···O3<sub>(NO2)</sub> &amp; C14-H6<sub>(CH)</sub>···O13<sub>(NO2)</sub><br/>           *N7-H18<sub>(NH3+)</sub>···O8<sub>(C=Oarom.)</sub> &amp; C11-H4<sub>(CHarom.)</sub>···O3<sub>(NO2)</sub><br/>           *N7-H7<sub>(NH3+)</sub>···O1<sub>(C=Oarom.)</sub> &amp; C11-H4<sub>(CHarom.)</sub>···O3<sub>(NO2)</sub><br/>           *N7-H8<sub>(NH3+)</sub>···O14<sub>(NO2)</sub> &amp; C11-H4<sub>(CHarom.)</sub>···O3<sub>(NO2)</sub><br/>           *C11-H4<sub>(CHarom.)</sub>···O3<sub>(NO2)</sub> &amp; C15-H9<sub>(CH2)</sub>···O11<sub>(NO2)</sub><br/>           *C11-H4<sub>(CHarom.)</sub>···O3<sub>(NO2)</sub> &amp; C16-H12<sub>(CH2)</sub>···O11<sub>(NO2)</sub><br/>           *C11-H4<sub>(CHarom.)</sub>···O3<sub>(NO2)</sub> &amp; C17-H13<sub>(CH2)</sub>···O12<sub>(NO2)</sub><br/>           *N8-H15<sub>(NH3+)</sub>···O1<sub>(C=Oarom.)</sub> &amp; C11-H14<sub>(CHarom.)</sub>···O3<sub>(NO2)</sub><br/>           *N8-H17<sub>(NH3+)</sub>···O8<sub>(C=Oarom.)</sub> &amp; C11-H14<sub>(CHarom.)</sub>···O3<sub>(NO2)</sub><br/>           *N8-H17<sub>(NH3+)</sub>···O14<sub>(NO2)</sub> &amp; C11-H14<sub>(CHarom.)</sub>···O3<sub>(NO2)</sub><br/>           *O16-H5<sub>(COOH)</sub>···O13<sub>(NO2)</sub> &amp; C16-H11<sub>(CH2)</sub>···O4<sub>(NO2)</sub><br/>           *N7-H18<sub>(NH3+)</sub>···O8<sub>(C=Oarom.)</sub> &amp; C16-H11<sub>(CH2)</sub>···O4<sub>(NO2)</sub><br/>           *N7-H7<sub>(NH3+)</sub>···O1<sub>(C=Oarom.)</sub> &amp; C15-H9<sub>(CH2)</sub>···O11<sub>(NO2)</sub><br/>           *N7-H7<sub>(NH3+)</sub>···O2<sub>(NO2)</sub> &amp; C15-H9<sub>(CH2)</sub>···O11<sub>(NO2)</sub><br/>           *N7-H8<sub>(NH3+)</sub>···O14<sub>(NO2)</sub> &amp; C15-H10<sub>(CH2)</sub>···O4<sub>(NO2)</sub><br/>           *C15-H9<sub>(CH2)</sub>···O11<sub>(NO2)</sub> &amp; C17-H14<sub>(CH2)</sub>···O4<sub>(NO2)</sub><br/>           *C15-H10<sub>(CH2)</sub>···O4<sub>(NO2)</sub> &amp; C17-H13<sub>(CH2)</sub>···O12<sub>(NO2)</sub><br/>           *N8-H16<sub>(NH3+)</sub>···O9<sub>(NO2)</sub> &amp; C16-H11<sub>(CH2)</sub>···O4<sub>(NO2)</sub><br/>           *N8-H16<sub>(NH3+)</sub>···O10<sub>(NO2)</sub> &amp; C16-H11<sub>(CH2)</sub>···O4<sub>(NO2)</sub><br/>           *N8-H17<sub>(NH3+)</sub>···O8<sub>(C=Oarom.)</sub> &amp; C16-H11<sub>(CH2)</sub>···O4<sub>(NO2)</sub><br/>           *N8-H17<sub>(NH3+)</sub>···O14<sub>(NO2)</sub> &amp; C16-H11<sub>(CH2)</sub>···O4<sub>(NO2)</sub><br/>           *N8-H15<sub>(NH3+)</sub>···O1<sub>(C=Oarom.)</sub> &amp; C16-H12<sub>(CH2)</sub>···O11<sub>(NO2)</sub></p> |
|  | $D_2^2(8)$ | <p>*N7-H7<sub>(NH3+)</sub>···O1<sub>(C=Oarom.)</sub> &amp; O16-H5<sub>(COOH)</sub>···O13<sub>(NO2)</sub><br/>           *N7-H7<sub>(NH3+)</sub>···O2<sub>(NO2)</sub> &amp; O16-H5<sub>(COOH)</sub>···O13<sub>(NO2)</sub><br/>           *O16-H5<sub>(COOH)</sub>···O13<sub>(NO2)</sub> &amp; C15-H10<sub>(CH2)</sub>···O4<sub>(NO2)</sub><br/>           *O16-H5<sub>(COOH)</sub>···O13<sub>(NO2)</sub> &amp; C17-H14<sub>(CH2)</sub>···O4<sub>(NO2)</sub><br/>           *N7-H18<sub>(NH3+)</sub>···O8<sub>(C=Oarom.)</sub> &amp; C17-H14<sub>(CH2)</sub>···O4<sub>(NO2)</sub><br/>           *N7-H7<sub>(NH3+)</sub>···O1<sub>(C=Oarom.)</sub> &amp; C16-H12<sub>(CH2)</sub>···O11<sub>(NO2)</sub><br/>           *N7-H7<sub>(NH3+)</sub>···O1<sub>(C=Oarom.)</sub> &amp; C16-H12<sub>(CH2)</sub>···O11<sub>(NO2)</sub><br/>           *N7-H8<sub>(NH3+)</sub>···O14<sub>(NO2)</sub> &amp; C16-H11<sub>(CH2)</sub>···O4<sub>(NO2)</sub><br/>           *N8-H15<sub>(NH3+)</sub>···O1<sub>(C=Oarom.)</sub> &amp; C15-H9<sub>(CH2)</sub>···O11<sub>(NO2)</sub><br/>           *N8-H16<sub>(NH3+)</sub>···O9<sub>(NO2)</sub> &amp; C15-H10<sub>(CH2)</sub>···O4<sub>(NO2)</sub><br/>           *N8-H16<sub>(NH3+)</sub>···O10<sub>(NO2)</sub> &amp; C15-H10<sub>(CH2)</sub>···O4<sub>(NO2)</sub><br/>           *N8-H17<sub>(NH3+)</sub>···O8<sub>(C=Oarom.)</sub> &amp; C15-H10<sub>(CH2)</sub>···O4<sub>(NO2)</sub><br/>           *N8-H17<sub>(NH3+)</sub>···O14<sub>(NO2)</sub> &amp; C15-H10<sub>(CH2)</sub>···O4<sub>(NO2)</sub></p>                                                                                                                                                                                                                                                                                                                                                                                                                                                                                                                                                                                                                                                                                                                                                                                                                                                                                                                                                                                                                                                                                                                                                                                                                 |
|  | $D_2^2(9)$ | <p>*C11-H4<sub>(CHarom.)</sub>···O3<sub>(NO2)</sub> &amp; C15-H10<sub>(CH2)</sub>···O4<sub>(NO2)</sub><br/>           *C11-H4<sub>(CHarom.)</sub>···O3<sub>(NO2)</sub> &amp; C16-H11<sub>(CH2)</sub>···O4<sub>(NO2)</sub><br/>           *C11-H4<sub>(CHarom.)</sub>···O3<sub>(NO2)</sub> &amp; C17-H14<sub>(CH2)</sub>···O4<sub>(NO2)</sub><br/>           *N8-H16<sub>(NH3+)</sub>···O9<sub>(NO2)</sub> &amp; C11-H14<sub>(CHarom.)</sub>···O3<sub>(NO2)</sub><br/>           *N8-H16<sub>(NH3+)</sub>···O10<sub>(NO2)</sub> &amp; C11-H14<sub>(CHarom.)</sub>···O3<sub>(NO2)</sub><br/>           *O16-H5<sub>(COOH)</sub>···O13<sub>(NO2)</sub> &amp; C16-H11<sub>(CH2)</sub>···O4<sub>(NO2)</sub><br/>           *O16-H5<sub>(COOH)</sub>···O13<sub>(NO2)</sub> &amp; N8-H15<sub>(NH3+)</sub>···O1<sub>(C=Oarom.)</sub><br/>           *N7-H18<sub>(NH3+)</sub>···O8<sub>(C=Oarom.)</sub> &amp; N8-H15<sub>(NH3+)</sub>···O1<sub>(C=Oarom.)</sub><br/>           *N7-H7<sub>(NH3+)</sub>···O1<sub>(C=Oarom.)</sub> &amp; C17-H13<sub>(CH2)</sub>···O12<sub>(NO2)</sub><br/>           *N7-H7<sub>(NH3+)</sub>···O2<sub>(NO2)</sub> &amp; C17-H13<sub>(CH2)</sub>···O12<sub>(NO2)</sub></p>                                                                                                                                                                                                                                                                                                                                                                                                                                                                                                                                                                                                                                                                                                                                                                                                                                                                                                                                                                                                                                                                                                                                                                                                                                                                                                                                                                                                                                                                                                                                                           |

|                |             |                                                                                                                                                                                                                                                                                                                                                                                                                                                                                                                                                                                                                                                                                                                                                                                 |
|----------------|-------------|---------------------------------------------------------------------------------------------------------------------------------------------------------------------------------------------------------------------------------------------------------------------------------------------------------------------------------------------------------------------------------------------------------------------------------------------------------------------------------------------------------------------------------------------------------------------------------------------------------------------------------------------------------------------------------------------------------------------------------------------------------------------------------|
|                |             | <p>*N7-H7<sub>(NH3+)</sub>...O2<sub>(NO2)</sub> &amp; N8-H16<sub>(NH3+)</sub>...O10<sub>(NO2)</sub><br/> *N7-H7<sub>(NH3+)</sub>...O2<sub>(NO2)</sub> &amp; N8-H17<sub>(NH3+)</sub>...O8<sub>(C=Oarom.)</sub><br/> *N7-H7<sub>(NH3+)</sub>...O2<sub>(NO2)</sub> &amp; N8-H17<sub>(NH3+)</sub>...O14<sub>(NO2)</sub><br/> *N7-H8<sub>(NH3+)</sub>...O14<sub>(NO2)</sub> &amp; C17-H14<sub>(CH2)</sub>...O4<sub>(NO2)</sub></p>                                                                                                                                                                                                                                                                                                                                                   |
|                | $D_2^2(10)$ | <p>*N7-H7<sub>(NH3+)</sub>...O1<sub>(C=Oarom.)</sub> &amp; N8-H16<sub>(NH3+)</sub>...O9<sub>(NO2)</sub><br/> *N7-H7<sub>(NH3+)</sub>...O1<sub>(C=Oarom.)</sub> &amp; N8-H16<sub>(NH3+)</sub>...O10<sub>(NO2)</sub><br/> *N7-H7<sub>(NH3+)</sub>...O1<sub>(C=Oarom.)</sub> &amp; N8-H17<sub>(NH3+)</sub>...O8<sub>(C=Oarom.)</sub><br/> *N7-H7<sub>(NH3+)</sub>...O1<sub>(C=Oarom.)</sub> &amp; N8-H17<sub>(NH3+)</sub>...O8<sub>(C=Oarom.)</sub><br/> *N7-H7<sub>(NH3+)</sub>...O1<sub>(C=Oarom.)</sub> &amp; N8-H17<sub>(NH3+)</sub>...O14<sub>(NO2)</sub><br/> *N7-H7<sub>(NH3+)</sub>...O2<sub>(NO2)</sub> &amp; N8-H16<sub>(NH3+)</sub>...O9<sub>(NO2)</sub><br/> *N7-H8<sub>(NH3+)</sub>...O14<sub>(NO2)</sub> &amp; N8-H15<sub>(NH3+)</sub>...O1<sub>(C=Oarom.)</sub></p> |
|                | $D_2^2(11)$ | O16-H5 <sub>(COOH)</sub> ...O13 <sub>(NO2)</sub> & N8-H15 <sub>(NH3+)</sub> ...O1 <sub>(C=Oarom.)</sub>                                                                                                                                                                                                                                                                                                                                                                                                                                                                                                                                                                                                                                                                         |
|                | $D_2^3(10)$ | N7-H7 <sub>(NH3+)</sub> ...O2 <sub>(NO2)</sub> & O5-H2...O2 <sub>(NO2)</sub> & N7-H7 <sub>(NH3+)</sub> ...N7 ornithine <sub>(NH3+)</sub>                                                                                                                                                                                                                                                                                                                                                                                                                                                                                                                                                                                                                                        |
|                | $D_3^3(12)$ | <p>*N7-H7<sub>(NH3+)</sub>...O1<sub>(C=Oarom.)</sub> &amp; C5-H2<sub>(CHarom.)</sub>...O2<sub>(NO2)</sub> &amp; N7-H7<sub>(NH3+)</sub>...O1<sub>(C=Oarom.)</sub><br/> *(N8-H15<sub>(NH3+)</sub>...O1<sub>(C=Oarom.)</sub>)<sub>2</sub> &amp; C5-H2<sub>(CHarom.)</sub>...O2<sub>(NO2)</sub></p>                                                                                                                                                                                                                                                                                                                                                                                                                                                                                 |
|                | $D_3^3(14)$ | <p>*C15-H10<sub>(CH2)</sub>...O4<sub>(NO2)</sub> &amp; C5-H2<sub>(CHarom.)</sub>...O2<sub>(NO2)</sub> &amp; C15-H10<sub>(CH2)</sub>...O4<sub>(NO2)</sub><br/> *C16-H11<sub>(CH2)</sub>...O4<sub>(NO2)</sub> &amp; C5-H2<sub>(CHarom.)</sub>...O2<sub>(NO2)</sub> &amp; C16-H11<sub>(CH2)</sub>...O4<sub>(NO2)</sub><br/> *C17-H14<sub>(CH2)</sub>...O4<sub>(NO2)</sub> &amp; C5-H2<sub>(CHarom.)</sub>...O2<sub>(NO2)</sub> &amp; C17-H14<sub>(CH2)</sub>...O4<sub>(NO2)</sub></p>                                                                                                                                                                                                                                                                                              |
| <b>VUVHYII</b> | $C(4)$      | C8-H19 <sub>(CH2)</sub> ...O5 <sub>(COO-)</sub>                                                                                                                                                                                                                                                                                                                                                                                                                                                                                                                                                                                                                                                                                                                                 |
|                | $C(5)$      | <p>*N1-H1<sub>(NH3+)</sub>...O2<sub>(COO-)</sub> ornithine<br/> *N1-H3<sub>(NH3+)</sub>...O2<sub>(COO-)</sub> ornithine<br/> *N3-H16<sub>(NH3+)</sub>...O4<sub>(COO-)</sub><br/> *C7-H17<sub>(CH)</sub>...O6<sub>(COO-)</sub></p>                                                                                                                                                                                                                                                                                                                                                                                                                                                                                                                                               |
|                | $C(6)$      | C4-H8 <sub>(CH2)</sub> ...O1 <sub>(COO-)</sub> ornithine                                                                                                                                                                                                                                                                                                                                                                                                                                                                                                                                                                                                                                                                                                                        |
|                | $C(8)$      | N2-H13 <sub>(NH3+)</sub> ...O1 <sub>(COO-)</sub> ornithine                                                                                                                                                                                                                                                                                                                                                                                                                                                                                                                                                                                                                                                                                                                      |
|                | $S(6)$      | <p>*N3-H15<sub>(NH3+)</sub>...O5<sub>(COO-)</sub><br/> *C4-H8<sub>(CH2)</sub>...O2<sub>(COO-)</sub> ornithine</p>                                                                                                                                                                                                                                                                                                                                                                                                                                                                                                                                                                                                                                                               |
|                | $D(2)$      | <p>*N1-H2<sub>(NH3+)</sub>...O3<sub>(COO-)</sub><br/> *C3-H6<sub>(CH2)</sub>...O3<sub>(COO-)</sub><br/> *N2-H11<sub>(NH3+)</sub>...O7<sub>(OH2)</sub><br/> *N2-H12<sub>(NH3+)</sub>...O4<sub>(COO-)</sub><br/> *N3-H14<sub>(NH3+)</sub>...O7<sub>(OH2)</sub><br/> *O7-H20<sub>(OH2)</sub>...O6<sub>(COO-)</sub><br/> *O7-H21<sub>(OH2)</sub>...O5<sub>(COO-)</sub></p>                                                                                                                                                                                                                                                                                                                                                                                                          |
|                | $D_3^3(10)$ | N1-H1 <sub>(NH3+)</sub> ...O2 <sub>(COO-)</sub> ornithine & (N1-H2 <sub>(NH3+)</sub> ...O3 <sub>(COO-)</sub> ) <sub>2</sub>                                                                                                                                                                                                                                                                                                                                                                                                                                                                                                                                                                                                                                                     |
| level 2        | $C_1^2(4)$  | N1-H1 <sub>(NH3+)</sub> ...O2 <sub>(COO-)</sub> ornithine & N1-H3 <sub>(NH3+)</sub> ...O2 <sub>(COO-)</sub> ornithine                                                                                                                                                                                                                                                                                                                                                                                                                                                                                                                                                                                                                                                           |
|                | $C_2^2(6)$  | (O7-H21 <sub>(OH2)</sub> ...O5 <sub>(COO-)</sub> ) <sub>2</sub> & O7-H20 <sub>(OH2)</sub> ...O6 <sub>(COO-)</sub>                                                                                                                                                                                                                                                                                                                                                                                                                                                                                                                                                                                                                                                               |
|                | $C_2^2(7)$  | C7-H17 <sub>(CH)</sub> ...O6 <sub>(COO-)</sub> & C8-H19 <sub>(CH2)</sub> ...O5 <sub>(COO-)</sub>                                                                                                                                                                                                                                                                                                                                                                                                                                                                                                                                                                                                                                                                                |
|                | $C_2^2(8)$  | <p>*O7-H20<sub>(OH2)</sub>...O6<sub>(COO-)</sub> &amp; N3-H14<sub>(NH3+)</sub>...O7<sub>(OH2)</sub><br/> *O7-H21<sub>(OH2)</sub>...O5<sub>(COO-)</sub> &amp; N3-H14<sub>(NH3+)</sub>...O7<sub>(OH2)</sub></p>                                                                                                                                                                                                                                                                                                                                                                                                                                                                                                                                                                   |
|                | $C_2^2(9)$  | <p>*N1-H1<sub>(NH3+)</sub>...O2<sub>(COO-)</sub> ornithine &amp; C4-H8<sub>(CH2)</sub>...O1<sub>(COO-)</sub> ornithine<br/> *N1-H3<sub>(NH3+)</sub>...O2<sub>(COO-)</sub> ornithine &amp; C3-H8<sub>(CH2)</sub>...O1<sub>(COO-)</sub> ornithine<br/> *N2-H12<sub>(NH3+)</sub>...O4<sub>(COO-)</sub> &amp; C3-H6<sub>(CH2)</sub>...O3<sub>(COO-)</sub><br/> *C7-H17<sub>(CH)</sub>...O6<sub>(COO-)</sub> &amp; C8-H19<sub>(CH2)</sub>...O5<sub>(COO-)</sub></p>                                                                                                                                                                                                                                                                                                                  |
|                | $C_2^2(10)$ | <p>*N1-H1<sub>(NH3+)</sub>...O2<sub>(COO-)</sub> ornithine &amp; N1-H3<sub>(NH3+)</sub>...O2<sub>(COO-)</sub> ornithine<br/> *N3-H16<sub>(NH3+)</sub>...O4<sub>(COO-)</sub> &amp; C7-H17<sub>(CH)</sub>...O6<sub>(COO-)</sub></p>                                                                                                                                                                                                                                                                                                                                                                                                                                                                                                                                               |
|                | $C_2^2(11)$ | <p>*N1-H1<sub>(NH3+)</sub>...O2<sub>(COO-)</sub> ornithine &amp; C4-H8<sub>(CH2)</sub>...O1<sub>(COO-)</sub> ornithine<br/> *N1-H1<sub>(NH3+)</sub>...O2<sub>(COO-)</sub> ornithine &amp; N2-H13<sub>(NH3+)</sub>...O1<sub>(COO-)</sub> ornithine<br/> *N1-H2<sub>(NH3+)</sub>...O4<sub>(COO-)</sub> &amp; N2-H12<sub>(NH3+)</sub>...O4<sub>(COO-)</sub><br/> *N1-H3<sub>(NH3+)</sub>...O2<sub>(COO-)</sub> ornithine &amp; N2-H13...O1<sub>(COO-)</sub> ornithine<br/> *C8-H19<sub>(CH2)</sub>...O5<sub>(COO-)</sub> &amp; N3-H16<sub>(NH3+)</sub>...O4<sub>(COO-)</sub></p>                                                                                                                                                                                                   |
|                | $C_2^2(13)$ | N1-H1 <sub>(NH3+)</sub> ...O2 <sub>(COO-)</sub> ornithine & N2-H13 <sub>(NH3+)</sub> ...O1 <sub>(COO-)</sub> ornithine                                                                                                                                                                                                                                                                                                                                                                                                                                                                                                                                                                                                                                                          |
|                | $C_2^2(14)$ | N2-H13 <sub>(NH3+)</sub> ...O1 <sub>(COO-)</sub> ornithine & C4-H8 <sub>(CH2)</sub> ...O1 <sub>(COO-)</sub> ornithine                                                                                                                                                                                                                                                                                                                                                                                                                                                                                                                                                                                                                                                           |
|                | $C_4^3(14)$ | (N1-H1 <sub>(NH3+)</sub> ...O2 <sub>(COO-)</sub> ) <sub>2</sub> ornithine & (N1-H3 <sub>(NH3+)</sub> ...O2 <sub>(COO-)</sub> ) <sub>2</sub> ornithine                                                                                                                                                                                                                                                                                                                                                                                                                                                                                                                                                                                                                           |
|                | $C_4^4(16)$ | (C7-H17 <sub>(CH)</sub> ...O6 <sub>(COO-)</sub> ) <sub>2</sub> & (C8-H19 <sub>(CH2)</sub> ...O5 <sub>(COO-)</sub> ) <sub>2</sub>                                                                                                                                                                                                                                                                                                                                                                                                                                                                                                                                                                                                                                                |
|                | $C_4^4(20)$ | <p>*(N1-H1<sub>(NH3+)</sub>...O2<sub>(COO-)</sub>)<sub>2</sub> ornithine &amp; (C4-H8<sub>(CH2)</sub>...O1<sub>(COO-)</sub>)<sub>2</sub> ornithine<br/> *N3-H16<sub>(NH3+)</sub>...O4<sub>(COO-)</sub> &amp; (C7-H17<sub>(CH)</sub>...O6<sub>(COO-)</sub>)<sub>2</sub></p>                                                                                                                                                                                                                                                                                                                                                                                                                                                                                                      |
|                | $R_2^1(6)$  | <p>*(N1-H2<sub>(NH3+)</sub>...O3<sub>(COO-)</sub>)<sub>2</sub> &amp; C3-H6<sub>(CH2)</sub>...O3<sub>(COO-)</sub><br/> *N2-H13<sub>(NH3+)</sub>...O1<sub>(COO-)</sub> ornithine &amp; C4-H8<sub>(CH2)</sub>...O1<sub>(COO-)</sub> ornithine</p>                                                                                                                                                                                                                                                                                                                                                                                                                                                                                                                                  |
|                | $R_2^2(11)$ | N1-H3 <sub>(NH3+)</sub> ...O2 <sub>(COO-)</sub> ornithine & C4-H8 <sub>(CH2)</sub> ...O1 <sub>(COO-)</sub> ornithine                                                                                                                                                                                                                                                                                                                                                                                                                                                                                                                                                                                                                                                            |
|                | $R_2^2(13)$ | N1-H3 <sub>(NH3+)</sub> ...O2 <sub>(COO-)</sub> ornithine & N2-H13 <sub>(NH3+)</sub> ...O1 <sub>(COO-)</sub> ornithine                                                                                                                                                                                                                                                                                                                                                                                                                                                                                                                                                                                                                                                          |
|                | $R_4^3(14)$ | (N1-H1 <sub>(NH3+)</sub> ...O2 <sub>(COO-)</sub> ) <sub>2</sub> ornithine & (N1-H3 <sub>(NH3+)</sub> ...O2 <sub>(COO-)</sub> ) <sub>2</sub> ornithine                                                                                                                                                                                                                                                                                                                                                                                                                                                                                                                                                                                                                           |
|                | $R_4^4(18)$ | (C7-H17 <sub>(CH)</sub> ...O6 <sub>(COO-)</sub> ) <sub>2</sub> & (C8-H19 <sub>(CH2)</sub> ...O5 <sub>(COO-)</sub> ) <sub>2</sub>                                                                                                                                                                                                                                                                                                                                                                                                                                                                                                                                                                                                                                                |
|                | $R_4^4(20)$ | <p>*(N1-H1<sub>(NH3+)</sub>...O2<sub>(COO-)</sub>)<sub>2</sub> ornithine &amp; (C4-H8<sub>(CH2)</sub>...O1<sub>(COO-)</sub>)<sub>2</sub> ornithine<br/> *(N3-H16<sub>(NH3+)</sub>...O4<sub>(COO-)</sub>)<sub>2</sub> &amp; (C7-H17<sub>(CH)</sub>...O6<sub>(COO-)</sub>)<sub>2</sub></p>                                                                                                                                                                                                                                                                                                                                                                                                                                                                                        |

|               |             |                                                                                                                                                                                                                                                                                                                                                                                                                                                                                                                                                                                                                                                                                                                                                                                                  |
|---------------|-------------|--------------------------------------------------------------------------------------------------------------------------------------------------------------------------------------------------------------------------------------------------------------------------------------------------------------------------------------------------------------------------------------------------------------------------------------------------------------------------------------------------------------------------------------------------------------------------------------------------------------------------------------------------------------------------------------------------------------------------------------------------------------------------------------------------|
|               | $D_2^1(3)$  | N2-H11 <sub>(NH3+)</sub> ...O7 <sub>(OH2)</sub> & N3-H14 <sub>(NH3+)</sub> ...O7 <sub>(OH2)</sub>                                                                                                                                                                                                                                                                                                                                                                                                                                                                                                                                                                                                                                                                                                |
|               | $D_2^2(4)$  | *O7-H20 <sub>(OH2)</sub> ...O6 <sub>(COO-)</sub> & N2-H11 <sub>(NH3+)</sub> ...O7 <sub>(OH2)</sub><br>*O7-H21 <sub>(OH2)</sub> ...O5 <sub>(COO-)</sub> & N2-H11 <sub>(NH3+)</sub> ...O7 <sub>(OH2)</sub>                                                                                                                                                                                                                                                                                                                                                                                                                                                                                                                                                                                         |
|               | $D_2^2(5)$  | N2-H11 <sub>(NH3+)</sub> ...O7 <sub>(OH2)</sub> & N2-H12 <sub>(NH3+)</sub> ...O4 <sub>(COO-)</sub>                                                                                                                                                                                                                                                                                                                                                                                                                                                                                                                                                                                                                                                                                               |
|               | $D_2^2(7)$  | *(N1-H2 <sub>(NH3+)</sub> ...O3 <sub>(COO-)</sub> ) <sub>2</sub> & N3-H14 <sub>(NH3+)</sub> ...O7 <sub>(OH2)</sub><br>*N3-H14 <sub>(NH3+)</sub> ...O7 <sub>(OH2)</sub> & (C3-H6 <sub>(CH2)</sub> ...O3 <sub>(COO-)</sub> ) <sub>2</sub><br>*N2-H12 <sub>(NH3+)</sub> ...O4 <sub>(COO-)</sub> & N3-H14 <sub>(NH3+)</sub> ...O7 <sub>(OH2)</sub>                                                                                                                                                                                                                                                                                                                                                                                                                                                   |
|               | $D_2^2(8)$  | *N1-H2 <sub>(NH3+)</sub> ...O3 <sub>(COO-)</sub> & O7-H20 <sub>(OH2)</sub> ...O6 <sub>(COO-)</sub><br>*N1-H2 <sub>(NH3+)</sub> ...O3 <sub>(COO-)</sub> & O7-H21 <sub>(OH2)</sub> ...O5 <sub>(COO-)</sub><br>*N2-H11 <sub>(NH3+)</sub> ...O7 <sub>(OH2)</sub> & C3-H6 <sub>(CH2)</sub> ...O3 <sub>(COO-)</sub><br>*O7-H20 <sub>(OH2)</sub> ...O6 <sub>(COO-)</sub> & (C3-H6 <sub>(CH2)</sub> ...O3 <sub>(COO-)</sub> ) <sub>2</sub><br>*O7-H21 <sub>(OH2)</sub> ...O5 <sub>(COO-)</sub> & (C3-H6 <sub>(CH2)</sub> ...O3 <sub>(COO-)</sub> ) <sub>2</sub><br>*N2-H12 <sub>(NH3+)</sub> ...O4 <sub>(COO-)</sub> & O7-H20 <sub>(OH2)</sub> ...O6 <sub>(COO-)</sub><br>*N2-H12 <sub>(NH3+)</sub> ...O4 <sub>(COO-)</sub> & O7-H21 <sub>(OH2)</sub> ...O5 <sub>(COO-)</sub>                            |
|               | $D_2^2(10)$ | (N1-H2 <sub>(NH3+)</sub> ...O3 <sub>(COO-)</sub> ) <sub>2</sub> & N2-H11 <sub>(NH3+)</sub> ...O7 <sub>(OH2)</sub>                                                                                                                                                                                                                                                                                                                                                                                                                                                                                                                                                                                                                                                                                |
|               | $D_2^3(7)$  | (O7-H21 <sub>(OH2)</sub> ...O5 <sub>(COO-)</sub> ) <sub>2</sub> & C8-H19 <sub>(CH2)</sub> ...O5 <sub>(COO-)</sub>                                                                                                                                                                                                                                                                                                                                                                                                                                                                                                                                                                                                                                                                                |
|               | $D_2^3(8)$  | *(N2-H12 <sub>(NH3+)</sub> ...O4 <sub>(COO-)</sub> ) <sub>2</sub> & N3-H16 <sub>(NH3+)</sub> ...O4 <sub>(COO-)</sub><br>*(O7-H20 <sub>(OH2)</sub> ...O6 <sub>(COO-)</sub> ) <sub>2</sub> & C7-H17 <sub>(OH2)</sub> ...O6 <sub>(COO-)</sub>                                                                                                                                                                                                                                                                                                                                                                                                                                                                                                                                                       |
|               | $D_3^3(9)$  | (O7-H20 <sub>(OH2)</sub> ...O6 <sub>(COO-)</sub> ) <sub>2</sub> & C8-H19 <sub>(CH2)</sub> ...O5 <sub>(COO-)</sub>                                                                                                                                                                                                                                                                                                                                                                                                                                                                                                                                                                                                                                                                                |
|               | $D_3^3(10)$ | *N1-H3 <sub>(NH3+)</sub> ...O2 <sub>(COO-)</sub> ornithine & (N1-H2 <sub>(NH3+)</sub> ...O3 <sub>(COO-)</sub> ) <sub>2</sub><br>*(N1-H2 <sub>(NH3+)</sub> ...O3 <sub>(COO-)</sub> ) <sub>2</sub> & N3-H16 <sub>(NH3+)</sub> ...O4 <sub>(COO-)</sub><br>*N3-H16 <sub>(NH3+)</sub> ...O4 <sub>(COO-)</sub> & (C3-H6 <sub>(CH2)</sub> ...O3 <sub>(COO-)</sub> ) <sub>2</sub><br>*(N3-H14 <sub>(NH3+)</sub> ...O7 <sub>(OH2)</sub> ) <sub>2</sub> & N3-H16 <sub>(NH3+)</sub> ...O4 <sub>(COO-)</sub><br>*(O7-H21 <sub>(OH2)</sub> ...O5 <sub>(COO-)</sub> ) <sub>2</sub> & C7-H17 <sub>(CH)</sub> ...O6 <sub>(COO-)</sub>                                                                                                                                                                            |
|               | $D_3^3(11)$ | (C3-H6 <sub>(CH2)</sub> ...O3 <sub>(COO-)</sub> ) <sub>2</sub> & C4-H8 <sub>(CH2)</sub> ...O1 <sub>(COO-)</sub> ornithine                                                                                                                                                                                                                                                                                                                                                                                                                                                                                                                                                                                                                                                                        |
|               | $D_3^3(12)$ | *(N1-H1 <sub>(NH3+)</sub> ...O2 <sub>(COO-)</sub> ) <sub>2</sub> ornithine & (C3-H6 <sub>(CH2)</sub> ...O3 <sub>(COO-)</sub> ) <sub>2</sub><br>*(N1-H2 <sub>(NH3+)</sub> ...O3 <sub>(COO-)</sub> ) <sub>2</sub> & C7-H17 <sub>(CH)</sub> ...O6 <sub>(COO-)</sub><br>*N1-H2 <sub>(NH3+)</sub> ...O3 <sub>(COO-)</sub> & (C3-H6 <sub>(CH2)</sub> ...O3 <sub>(COO-)</sub> ) <sub>2</sub><br>*(C3-H6 <sub>(CH2)</sub> ...O3 <sub>(COO-)</sub> ) <sub>2</sub> & C7-H17 <sub>(CH)</sub> ...O6 <sub>(COO-)</sub><br>*(N2-H12 <sub>(NH3+)</sub> ...O4 <sub>(COO-)</sub> ) <sub>2</sub> & C7-H17 <sub>(CH)</sub> ...O6 <sub>(COO-)</sub><br>*(N3-H14 <sub>(NH3+)</sub> ...O7 <sub>(OH2)</sub> ) <sub>2</sub> & C7-H17 <sub>(CH)</sub> ...O6 <sub>(COO-)</sub>                                             |
|               | $D_3^3(13)$ | *(N1-H2 <sub>(NH3+)</sub> ...O3 <sub>(COO-)</sub> ) <sub>2</sub> & C4-H8 <sub>(CH2)</sub> ...O1 <sub>(COO-)</sub> ornithine<br>*(C3-H6 <sub>(CH2)</sub> ...O3 <sub>(COO-)</sub> ) <sub>2</sub> & C8-H19 <sub>(CH2)</sub> ...O5 <sub>(COO-)</sub><br>*(N2-H11 <sub>(NH3+)</sub> ...O7 <sub>(OH2)</sub> ) <sub>2</sub> & N2-H13 <sub>(NH3+)</sub> ...O1 <sub>(COO-)</sub> ornithine<br>*(N2-H12 <sub>(NH3+)</sub> ...O4 <sub>(COO-)</sub> ) <sub>2</sub> & N2-H13 <sub>(NH3+)</sub> ...O1 <sub>(COO-)</sub> ornithine<br>*(N2-H12 <sub>(NH3+)</sub> ...O4 <sub>(COO-)</sub> ) <sub>2</sub> & C8-H19 <sub>(CH2)</sub> ...O5 <sub>(COO-)</sub><br>*(N3-H14 <sub>(NH3+)</sub> ...O7 <sub>(OH2)</sub> ) <sub>2</sub> & C8-H19 <sub>(CH2)</sub> ...O5 <sub>(COO-)</sub>                                 |
|               | $D_3^3(14)$ | *(O7-H20 <sub>(OH2)</sub> ...O6 <sub>(COO-)</sub> ) <sub>2</sub> & N3-H16 <sub>(NH3+)</sub> ...O4 <sub>(COO-)</sub><br>*N3-H16 <sub>(NH3+)</sub> ...O4 <sub>(COO-)</sub> & (O7-H21 <sub>(OH2)</sub> ...O5 <sub>(COO-)</sub> ) <sub>2</sub>                                                                                                                                                                                                                                                                                                                                                                                                                                                                                                                                                       |
|               | $D_3^3(15)$ | *(N1-H2 <sub>(NH3+)</sub> ...O3 <sub>(COO-)</sub> ) <sub>2</sub> & N2-H13 <sub>(NH3+)</sub> ...O1 <sub>(COO-)</sub> ornithine<br>*(N2-H11 <sub>(NH3+)</sub> ...O7 <sub>(OH2)</sub> ) <sub>2</sub> & C4-H8 <sub>(CH2)</sub> ...O1 <sub>(COO-)</sub> ornithine<br>*(N2-H12 <sub>(NH3+)</sub> ...O4 <sub>(COO-)</sub> ) <sub>2</sub> & C4-H8 <sub>(CH2)</sub> ...O1 <sub>(COO-)</sub> ornithine                                                                                                                                                                                                                                                                                                                                                                                                     |
|               | $D_3^3(16)$ | *(N1-H2 <sub>(NH3+)</sub> ...O3 <sub>(COO-)</sub> ) <sub>2</sub> & C8-H19 <sub>(CH2)</sub> ...O5 <sub>(COO-)</sub><br>*N2-H13 <sub>(NH3+)</sub> ...O1 <sub>(COO-)</sub> ornithine & (C3-H6 <sub>(CH2)</sub> ...O3 <sub>(COO-)</sub> ) <sub>2</sub>                                                                                                                                                                                                                                                                                                                                                                                                                                                                                                                                               |
|               | $D_3^3(18)$ | *(N1-H1 <sub>(NH3+)</sub> ...O2 <sub>(COO-)</sub> ) <sub>2</sub> ornithine & (N2-H11 <sub>(NH3+)</sub> ...O7 <sub>(OH2)</sub> ) <sub>2</sub><br>*N1-H1 <sub>(NH3+)</sub> ...O2 <sub>(COO-)</sub> ornithine & (N2-H12 <sub>(NH3+)</sub> ...O4 <sub>(COO-)</sub> ) <sub>2</sub><br>*N1-H3 <sub>(NH3+)</sub> ...O2 <sub>(COO-)</sub> ornithine & (N2-H11 <sub>(NH3+)</sub> ...O7 <sub>(OH2)</sub> ) <sub>2</sub><br>*N1-H3 <sub>(NH3+)</sub> ...O2 <sub>(COO-)</sub> ornithine & (N2-H12 <sub>(NH3+)</sub> ...O4 <sub>(COO-)</sub> ) <sub>2</sub>                                                                                                                                                                                                                                                   |
| <b>YIGMAE</b> | $D(2)$      | *N1-H2 <sub>(NH3+)</sub> ...O9 <sub>(COO-)</sub> ornithine<br>*N1-H3 <sub>(NH3+)</sub> ...F23<br>*N1-H3 <sub>(NH3+)</sub> ...F26<br>*N1-H4 <sub>(NH3+)</sub> ...O11 <sub>(COO-)</sub> ornithine<br>*C4-H7 <sub>(CH2)</sub> ...F26<br>*N2-H11 <sub>(NH3+)</sub> ...O6 <sub>(COO-)</sub> ornithine<br>*N2-H12 <sub>(NH3+)</sub> ...F12<br>*N2-H12 <sub>(NH3+)</sub> ...F13<br>*N2-H12 <sub>(NH3+)</sub> ...F16<br>*N2-H12 <sub>(NH3+)</sub> ...F17<br>*N2-H13 <sub>(NH3+)</sub> ...F1<br>*N2-H13 <sub>(NH3+)</sub> ...F3<br>*N2-H13 <sub>(NH3+)</sub> ...F10<br>*C7-H14 <sub>(CH)</sub> ...F6<br>*N3-H15 <sub>(NH3+)</sub> ...O5 <sub>(COO-)</sub> ornithine<br>*N3-H16 <sub>(NH3+)</sub> ...O12 <sub>(COO-)</sub> ornithine<br>*N3-H17 <sub>(NH3+)</sub> ...F4<br>*N3-H17 <sub>(NH3+)</sub> ...F6 |

|         |             |                                                                                                                                                                                                                                                                                                                                                                                                                                                                                                                                                       |
|---------|-------------|-------------------------------------------------------------------------------------------------------------------------------------------------------------------------------------------------------------------------------------------------------------------------------------------------------------------------------------------------------------------------------------------------------------------------------------------------------------------------------------------------------------------------------------------------------|
|         |             | *N3-H1 <sub>(NH3+)</sub> ...F10<br>*C8-H18 <sub>(CH2)</sub> ...F3<br>*C8-H18 <sub>(CH2)</sub> ...F10<br>*C9-H20 <sub>(CH2)</sub> ...F12<br>*N4-H24 <sub>(NH3+)</sub> ...O9 <sub>(COO-)</sub> ornithine<br>*N4-H25 <sub>(NH3+)</sub> ...F22<br>*N4-H25 <sub>(NH3+)</sub> ...F23                                                                                                                                                                                                                                                                        |
| level 2 | $D^1_2(3)$  | *N2-H11 <sub>(NH3+)</sub> ...O6 <sub>(COO-)</sub> ornithine & N7-H41 <sub>(NH3+)</sub> ...O6 <sub>(COO-)</sub> ornithine<br>*N1-H3 <sub>(NH3+)</sub> ...F23 & N10-H65 <sub>(NH3+)</sub> ...F23<br>*N1-H3 <sub>(NH3+)</sub> ...F26 & C18-H44 <sub>(CH2)</sub> ...F26<br>*C18-H44 <sub>(CH2)</sub> ...F26 & C4-H7 <sub>(CH2)</sub> ...F26                                                                                                                                                                                                               |
|         | $D^2_2(4)$  | *N2-H12 <sub>(NH3+)</sub> ...F12 & N4-H26 <sub>(NH3+)</sub> ...F20<br>*N6-H38 <sub>(NH3+)</sub> ...F13 & N2-H12 <sub>(NH3+)</sub> ...F13                                                                                                                                                                                                                                                                                                                                                                                                              |
|         | $D^2_2(5)$  | *N1-H3 <sub>(NH3+)</sub> ...F23 & N1-H2 <sub>(NH3+)</sub> ...O9 <sub>(COO-)</sub><br>*N1-H4 <sub>(NH3+)</sub> ...O11 <sub>(COO-)</sub> ornithine & N1-H2 <sub>(NH3+)</sub> ...O9 <sub>(COO-)</sub> ornithine<br>*C18-H44 <sub>(CH2)</sub> ...F22 & N1-H3 <sub>(NH3+)</sub> ...F23<br>*N5-H29 <sub>(NH3+)</sub> ...F21 & N1-H3 <sub>(NH3+)</sub> ...F23<br>*C4-H7 <sub>(CH2)</sub> ...F26 & C12-H27 <sub>(CH)</sub> ...F25<br>*N2-H11 <sub>(NH3+)</sub> ...O6 <sub>(COO-)</sub> ornithine & C25-H61 <sub>(CH2)</sub> ...O5 <sub>(COO-)</sub> ornithine |
|         | $D^2_2(6)$  | *N2-H11 <sub>(NH3+)</sub> ...O6 <sub>(COO-)</sub> ornithine & C12-H27 <sub>(CH)</sub> ...F25<br>*N2-H11 <sub>(NH3+)</sub> ...O6 <sub>(COO-)</sub> ornithine & N5-H28 <sub>(NH3+)</sub> ...O8 <sub>(COO-)</sub> ornithine                                                                                                                                                                                                                                                                                                                              |
|         | $D^2_2(7)$  | *N1-H2 <sub>(NH3+)</sub> ...O9 <sub>(COO-)</sub> ornithine & N6-H37 <sub>(NH3+)</sub> ...O2 <sub>(COO-)</sub> ornithine<br>*N1-H2 <sub>(NH3+)</sub> ...O9 <sub>(COO-)</sub> ornithine & N9-H55 <sub>(NH3+)</sub> ...F14<br>*N2-H11 <sub>(NH3+)</sub> ...O6 <sub>(COO-)</sub> ornithine & C4-H7 <sub>(CH2)</sub> ...F26<br>*N2-H12 <sub>(NH3+)</sub> ...F12 & C4-H7 <sub>(CH2)</sub> ...F26<br>*C7-H14 <sub>(CH)</sub> ...F6 & C9-H20 <sub>(CH2)</sub> ...F12                                                                                          |
|         | $D^2_2(8)$  | *N1-H2 <sub>(NH3+)</sub> ...O9 <sub>(COO-)</sub> ornithine & C4-H7 <sub>(CH2)</sub> ...F26<br>*N1-H4 <sub>(NH3+)</sub> ...O1 <sub>(COO-)</sub> ornithine 1 & C4-H7 <sub>(CH2)</sub> ...F26                                                                                                                                                                                                                                                                                                                                                            |
|         | $D^2_2(9)$  | *N1-H2 <sub>(NH3+)</sub> ...O9 <sub>(COO-)</sub> ornithine & C25-H61 <sub>(CH2)</sub> ...O5 <sub>(COO-)</sub> ornithine<br>*N1-H4 <sub>(NH3+)</sub> ...O11 ornithine & C30-H75 <sub>(CH2)</sub> ...F22<br>*N4-H25 <sub>(NH3+)</sub> ...F22 & C7-H14 <sub>(CH)</sub> ...F6                                                                                                                                                                                                                                                                             |
|         | $D^2_2(10)$ | *N1-H2 <sub>(NH3+)</sub> ...O9 <sub>(COO-)</sub> ornithine & N2-H11 <sub>(NH3+)</sub> ...O6 <sub>(COO-)</sub> ornithine<br>*N1-H2 <sub>(NH3+)</sub> ...O9 <sub>(COO-)</sub> ornithine & N2-H12 <sub>(NH3+)</sub> ...F12<br>*N1-H3 <sub>(NH3+)</sub> ...F23 & N2-H12 <sub>(NH3+)</sub> ...F12                                                                                                                                                                                                                                                          |
|         | $D^1_2(3)$  | *N1-H2 <sub>(NH3+)</sub> ...O9 <sub>(COO-)</sub> ornithine & N4-H24 <sub>(NH3+)</sub> ...O9 <sub>(COO-)</sub> ornithine<br>*N2-H12 <sub>(NH3+)</sub> ...F16 & N12-H78 <sub>(NH3+)</sub> ...F16                                                                                                                                                                                                                                                                                                                                                        |
|         | $C^2_2(10)$ | N1-H4 <sub>(NH3+)</sub> ...O11 <sub>(COO-)</sub> ornithine & N11-H69 <sub>(NH3+)</sub> ...O1 <sub>(COO-)</sub> ornithine                                                                                                                                                                                                                                                                                                                                                                                                                              |
|         | $R^1_2(5)$  | N3-H17 <sub>(NH3+)</sub> ...F6 & C7-H14 <sub>(CH)</sub> ...F6                                                                                                                                                                                                                                                                                                                                                                                                                                                                                         |
|         | $R^1_2(6)$  | N3-H17 <sub>(NH3+)</sub> ...F4 & C8-H18 <sub>(CH2)</sub> ...F10                                                                                                                                                                                                                                                                                                                                                                                                                                                                                       |
|         | $R^1_2(7)$  | N1-H3 <sub>(NH3+)</sub> ...F26 & C4-H7 <sub>(CH2)</sub> ...F26                                                                                                                                                                                                                                                                                                                                                                                                                                                                                        |
|         | $R^2_1(3)$  | N2-H12 <sub>(NH3+)</sub> ...F13 & N2-H12 <sub>(NH3+)</sub> ...F17                                                                                                                                                                                                                                                                                                                                                                                                                                                                                     |
|         | $R^2_1(4)$  | N1-H3 <sub>(NH3+)</sub> ...F23 & N1-H3 <sub>(NH3+)</sub> ...F26                                                                                                                                                                                                                                                                                                                                                                                                                                                                                       |
|         | $R^2_2(7)$  | *N3-H17 <sub>(NH3+)</sub> ...F4 & C4-H14 <sub>(CH2)</sub> ...F6<br>*C12-H27 <sub>(CH)</sub> ...F25 & C13-H31 <sub>(CH2)</sub> ...F24                                                                                                                                                                                                                                                                                                                                                                                                                  |
|         | $R^2_2(8)$  | N3-H17 <sub>(NH3+)</sub> ...F4 & C8-H18 <sub>(CH2)</sub> ...F3                                                                                                                                                                                                                                                                                                                                                                                                                                                                                        |
|         | $R^2_2(9)$  | N1-H3 <sub>(NH3+)</sub> ...F23 & C4-H7 <sub>(CH2)</sub> ...F26                                                                                                                                                                                                                                                                                                                                                                                                                                                                                        |
|         | $R^2_2(10)$ | N1-H2 <sub>(NH3+)</sub> ...O9 <sub>(COO-)</sub> ornithine & N9-H54...O2 <sub>(COO-)</sub> ornithine                                                                                                                                                                                                                                                                                                                                                                                                                                                   |
|         | $R^2_2(16)$ | N2-H11 <sub>(NH3+)</sub> ...O6 <sub>(COO-)</sub> ornithine & N6-H37 <sub>(NH3+)</sub> ...O2 <sub>(COO-)</sub> ornithine                                                                                                                                                                                                                                                                                                                                                                                                                               |

**Table S6.** Interplay of interactions (forming synthons) between various functionalities in crystals of ornithine derivatives.

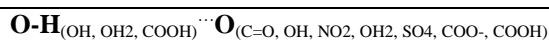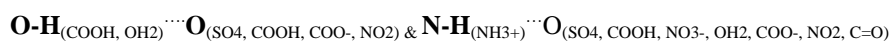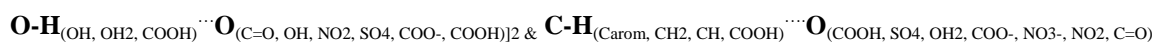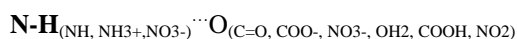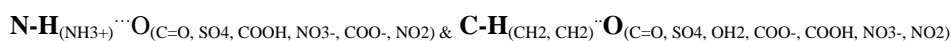

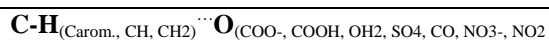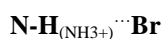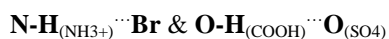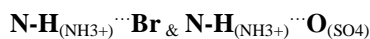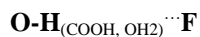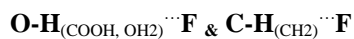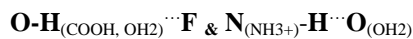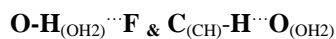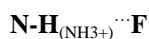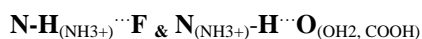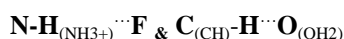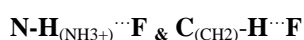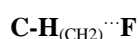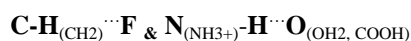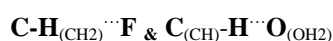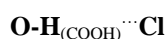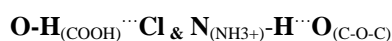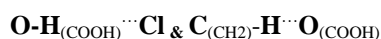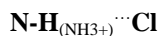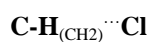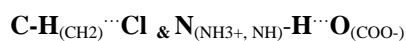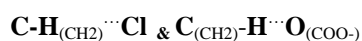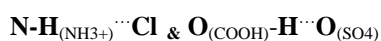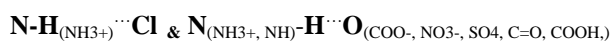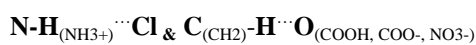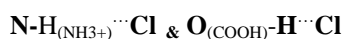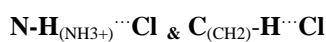

**Table S7.** Percentage contributions of interatomic contacts to the Hirshfeld surface for **(1)**, **(2)** and other ornithine derivatives.

|               | H $\cdots$ H | O $\cdots$ H | C $\cdots$ H | C $\cdots$ O | C $\cdots$ C | N $\cdots$ H<br>/H $\cdots$ N | O $\cdots$ O | N $\cdots$ O<br>/N $\cdots$ O | Cl $\cdots$ H<br>/H $\cdots$ Cl | Br $\cdots$ H<br>/H $\cdots$ Br | F $\cdots$ O<br>/O $\cdots$ F | F $\cdots$ H<br>/H $\cdots$ F | Cu $\cdots$ Cl<br>/Cl $\cdots$ Cu | Cl $\cdots$ F<br>/F $\cdots$ Cl | Cl $\cdots$ O<br>/O $\cdots$ Cl |
|---------------|--------------|--------------|--------------|--------------|--------------|-------------------------------|--------------|-------------------------------|---------------------------------|---------------------------------|-------------------------------|-------------------------------|-----------------------------------|---------------------------------|---------------------------------|
| <b>EXPFAU</b> | 53.6         | 20.1         | 18.9         |              | 1.5          |                               |              |                               |                                 |                                 |                               |                               |                                   |                                 |                                 |
| <b>(1)</b>    | 53.4         | 23.1         | 17.9         | 3.2          | 1            |                               |              |                               |                                 |                                 |                               |                               |                                   |                                 |                                 |
| <b>GOTFAY</b> | 12.9         | 77.2         | 1.4          |              |              |                               | 6.6          | 1.6                           |                                 |                                 |                               |                               |                                   |                                 |                                 |
| <b>TEFMIA</b> | 10.9         | 75.2         | 1.2          |              |              | 1                             | 9.7          | 1.4                           |                                 |                                 |                               |                               |                                   |                                 |                                 |

|                 |      |      |     |  |     |  |  |      |      |                  |
|-----------------|------|------|-----|--|-----|--|--|------|------|------------------|
| <b>ORNBDL10</b> | 45.4 | 37.1 | 2   |  |     |  |  |      |      | 15.5             |
| <b>BAPKUB</b>   | 39.4 | 41.4 |     |  | 1.4 |  |  |      |      | 16.6             |
| <b>BAPKOV</b>   | 39   | 42.1 |     |  | 1.1 |  |  |      | 16.4 |                  |
| <b>EVIJAU</b>   | 33.2 | 54.6 |     |  | 1.6 |  |  |      | 8.6  |                  |
| <b>(2)</b>      | 30   | 65.2 | 4.3 |  |     |  |  |      |      |                  |
| <b>BEZQOO</b>   | 26.8 | 25.3 |     |  |     |  |  |      | 1.2  | 45.6             |
| <b>IHEPES</b>   | 16.5 | 19.4 |     |  |     |  |  | 33.5 | 1.5  | 19.8 2.6 3.3 1.7 |
| <b>YIGMAE</b>   | 27.7 | 37.6 | 1.6 |  |     |  |  |      |      | 31.9             |
| <b>VUYHII</b>   | 41   | 56   | 2.9 |  |     |  |  |      |      |                  |
| <b>CAPRAM</b>   | 39.9 | 57.4 | 1.6 |  |     |  |  |      |      |                  |
| <b>BIHYEX</b>   | 34.5 | 64.3 |     |  |     |  |  |      |      |                  |
| <b>BAPKIP</b>   | 29.9 | 66.9 |     |  |     |  |  |      |      |                  |
| <b>JADGED</b>   | 30   | 65.2 | 4.3 |  |     |  |  |      |      |                  |
| <b>PUYVUA</b>   | 29.7 | 67.2 | 1.8 |  | 1.2 |  |  |      |      |                  |

**Table S8.** Properties of ornithine moiety in analyzed structures, as derived from HS calculations.

|                 | <i>Volume</i><br>[Å <sup>3</sup> ] | <i>Area</i><br>[Å <sup>2</sup> ] | <i>Globularity</i> | <i>Asphericity</i> |
|-----------------|------------------------------------|----------------------------------|--------------------|--------------------|
| <b>EXOFAY</b>   | 437.70                             | 402.46                           | 0.693              | 0.334              |
| <b>(1)</b>      | 490.02                             | 414.82                           | 0.725              | 0.080              |
| <b>GOTFAY</b>   | 170.58                             | 182.82                           | 0.814              | 0.111              |
| <b>TEFMIA</b>   | 168.25                             | 179.65                           | 0.820              | 0.118              |
| <b>ORNBDL10</b> | 159.68                             | 171.08                           | 0.832              | 0.130              |
| <b>BAPKUP</b>   | 168.92                             | 177.59                           | 0.832              | 0.088              |
| <b>BAPKOV</b>   | 168                                | 176.45                           | 0.835              | 0.089              |
| <b>EVIJAU</b>   | 168.20                             | 177.50                           | 0.830              | 0.089              |
| <b>(2)</b>      | 161.12                             | 172.85                           | 0.828              | 0.138              |
| <b>BEZQOO</b>   | 176.26                             | 181.92                           | 0.836              | 0.136              |
| <b>IHEPES</b>   | 257.96                             | 254.61                           | 0.770              | 0.028              |
| <b>YIGMAE</b>   | 165.89                             | 177.66                           | 0.822              | 0.119              |
| <b>VUYHII</b>   | 160.49                             | 170.86                           | 0.836              | 0.132              |
| <b>CAPRAM</b>   | 162.17                             | 173.91                           | 0.827              | 0.131              |

|               |        |        |       |       |
|---------------|--------|--------|-------|-------|
| <b>BIHYEX</b> | 180.48 | 184.95 | 0.835 | 0.144 |
| <b>BAPKIP</b> | 178    | 183.88 | 0.832 | 0.126 |
| <b>JADGED</b> | 162.94 | 172.7  | 0.835 | 0.102 |
| <b>PUYVUA</b> | 163.96 | 172.54 | 0.840 | 0.123 |

**Table S9.** Water solubility predictions of ornithine-based compounds.

| Compound | LogP<br>(concensus LogP) | LogS<br>(ESOL) | LogS<br>(Ali)  | LogS<br>(SILICOS-IT) |
|----------|--------------------------|----------------|----------------|----------------------|
| DFMO     | -0.87                    | highly soluble | highly soluble | soluble              |
| (1)      | 1.81                     | soluble        | soluble        | moderately soluble   |
| EXOFAY   | 0.06                     | soluble        | soluble        | soluble              |
| GOTFAY   | -2.75                    | highly soluble | highly soluble | soluble              |
| TEFMIA   | -1.24                    | highly soluble | soluble        | soluble              |
| (2)      | -3.83                    | highly soluble | highly soluble | soluble              |
| ORNBDL10 | -3.76                    | highly soluble | highly soluble | soluble              |
| BAPKUB   | -4.56                    | highly soluble | highly soluble | soluble              |
| BAPKOV   | -4.63                    | highly soluble | highly soluble | soluble              |
| EVIJAU   | -4.49                    | highly soluble | highly soluble | soluble              |
| BEZQOO   | -1.84                    | highly soluble | highly soluble | soluble              |
| YIGMAE   | -1.83                    | highly soluble | highly soluble | soluble              |
| IHEPES   | -0.73                    | soluble        | soluble        | soluble              |
| VUYHII   | -6.60                    | highly soluble | highly soluble | soluble              |
| CAPRAM   | -6.60                    | highly soluble | highly soluble | soluble              |
| BIHYEX   | -4.72                    | highly soluble | highly soluble | soluble              |
| BAPKIP   | -4.39                    | highly soluble | highly soluble | soluble              |
| JADGED   | -4.49                    | highly soluble | highly soluble | soluble              |
| PUYVUA   | -3.23                    | highly soluble | highly soluble | soluble              |

**Table S10.** Pharmacokinetic toxicity parameters obtained *via* pkCSM web server.

|                                                |       |
|------------------------------------------------|-------|
| AMES toxicity                                  | no    |
| Max. tolerated dose (human)<br>[log mg/kg/day] | 0.199 |
| hERG I inhibitor                               | no    |

|                                                      |       |
|------------------------------------------------------|-------|
| hERG II inhibitor                                    | no    |
| Oral rat acute toxicity (LD50) [mol/kg]              | 2.456 |
| Oral rat chronic toxicity (LOAEL) [log mg/kg_bw/day] | 2.914 |
| hepatotoxicity                                       | yes   |
| Skin sensitisation                                   | no    |
| <i>T. Pyriformis</i> toxicity [log ug/L]             | 0.296 |
| Minnow toxicity [log mM]                             | 2.265 |

**Table S11.** Toxicity parameters for (1).

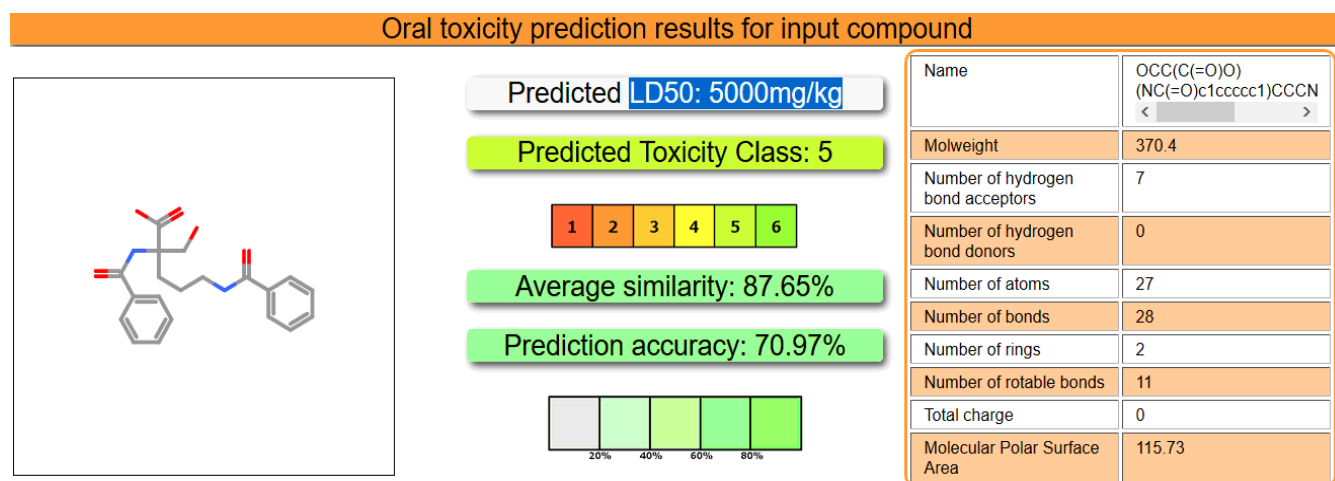

**Table S12.** Toxicity model report for (1).

**Toxicity Model Report**

| Classification                             | Target                                                                                | Shorthand     | Prediction | Probability |
|--------------------------------------------|---------------------------------------------------------------------------------------|---------------|------------|-------------|
| Organ toxicity                             | Hepatotoxicity                                                                        | dili          | Inactive   | 0.86        |
| Toxicity end points                        | Carcinogenicity                                                                       | carcino       | Inactive   | 0.67        |
| Toxicity end points                        | Immunotoxicity                                                                        | immuno        | Inactive   | 0.98        |
| Toxicity end points                        | Mutagenicity                                                                          | mutagen       | Inactive   | 0.72        |
| Toxicity end points                        | Cytotoxicity                                                                          | cyto          | Inactive   | 0.78        |
| Tox21-Nuclear receptor signalling pathways | Aryl hydrocarbon Receptor (AhR)                                                       | nr_ahr        | Inactive   | 0.92        |
| Tox21-Nuclear receptor signalling pathways | Androgen Receptor (AR)                                                                | nr_ar         | Inactive   | 0.95        |
| Tox21-Nuclear receptor signalling pathways | Androgen Receptor Ligand Binding Domain (AR-LBD)                                      | nr_ar_lbd     | Inactive   | 0.98        |
| Tox21-Nuclear receptor signalling pathways | Aromatase                                                                             | nr_aromatase  | Inactive   | 0.92        |
| Tox21-Nuclear receptor signalling pathways | Estrogen Receptor Alpha (ER)                                                          | nr_er         | Inactive   | 0.90        |
| Tox21-Nuclear receptor signalling pathways | Estrogen Receptor Ligand Binding Domain (ER-LBD)                                      | nr_er_lbd     | Inactive   | 0.99        |
| Tox21-Nuclear receptor signalling pathways | Peroxisome Proliferator Activated Receptor Gamma (PPAR-Gamma)                         | nr_ppar_gamma | Inactive   | 0.96        |
| Tox21-Stress response pathways             | Nuclear factor (erythroid-derived 2)-like 2/antioxidant responsive element (nrf2/ARE) | sr_are        | Inactive   | 0.96        |
| Tox21-Stress response pathways             | Heat shock factor response element (HSE)                                              | sr_hse        | Inactive   | 0.96        |
| Tox21-Stress response pathways             | Mitochondrial Membrane Potential (MMP)                                                | sr_mmp        | Inactive   | 0.87        |
| Tox21-Stress response pathways             | Phosphoprotein (Tumor Suppressor) p53                                                 | sr_p53        | Inactive   | 0.94        |
| Tox21-Stress response pathways             | ATPase family AAA domain-containing protein 5 (ATAD5)                                 | sr_atad5      | Inactive   | 0.97        |
